# Supplementary material for: The Impact of Dose and Dose Frequency on Word Learning by Kindergarten Children With Developmental Language Disorder During Interactive Book Reading
Source: PubMed Central journal article supplement — Lang Speech Hear Serv Sch. 2019 Oct 10;50(4):518–39. doi: 10.1044/2019_LSHSS-VOIA-18-0131 (PMC7210430; doi:10.1044/2019_lshss-voia-18-0131), 2019-10-10
Supplement: LSHSS-50-518-s001.pdf [file LSHSS-50-518-s001.pdf]

Supplemental Material S1 displays nesting of children within classrooms (identified by teacher) within schools. Note that data collection occurred across multiple years so children identified as being in the same classroom or school may not have been seen at the same time.

**Supplemental Material S1.** *Number of children at each school and in each classroom (identified by teacher) within school.*

|                        |   |
|------------------------|---|
| Elementary School 1    | 5 |
| <i>Teacher 1</i>       | 2 |
| <i>Teacher 2</i>       | 2 |
| <i>Teacher 3</i>       | 1 |
| Elementary School 2    | 5 |
| <i>Teacher 4</i>       | 3 |
| <i>Teacher 5</i>       | 1 |
| <i>Teacher 6</i>       | 1 |
| Elementary School 3    | 4 |
| <i>Teacher 7</i>       | 2 |
| <i>Teacher 8</i>       | 1 |
| <i>Teacher Unknown</i> | 1 |
| Elementary School 4    | 4 |
| <i>Teacher 9</i>       | 2 |
| <i>Teacher 10</i>      | 1 |
| <i>Teacher Unknown</i> | 1 |
| Elementary School 5    | 3 |
| <i>Teacher 11</i>      | 2 |
| <i>Teacher 12</i>      | 1 |
| Elementary School 6    | 3 |
| <i>Teacher 13</i>      | 2 |
| <i>Teacher 14</i>      | 1 |
| Elementary School 7    | 2 |
| <i>Teacher 15</i>      | 1 |
| <i>Teacher 16</i>      | 1 |
| Elementary School 8    | 2 |
| <i>Teacher 17</i>      | 1 |
| <i>Teacher 18</i>      | 1 |
| Elementary School 9    | 2 |
| <i>Teacher 19</i>      | 1 |
| <i>Teacher 20</i>      | 1 |
| Elementary School 10   | 1 |
| <i>Teacher 21</i>      | 1 |
| Elementary School 11   | 1 |
| <i>Teacher 22</i>      | 1 |
| Elementary School 12   | 1 |
| <i>Teacher 23</i>      | 1 |
| Elementary School 13   | 1 |
| <i>Teacher 24</i>      | 1 |
