# Supplementary material for: The Impact of Dose and Dose Frequency on Word Learning by Kindergarten Children With Developmental Language Disorder During Interactive Book Reading
Source: PubMed Central journal article supplement — Lang Speech Hear Serv Sch. 2019 Oct 10;50(4):518–39. doi: 10.1044/2019_LSHSS-VOIA-18-0131 (PMC7210430; doi:10.1044/2019_lshss-voia-18-0131), 2019-10-10
Supplement: LSHSS-50-518-s004.pdf [file LSHSS-50-518-s004.pdf]

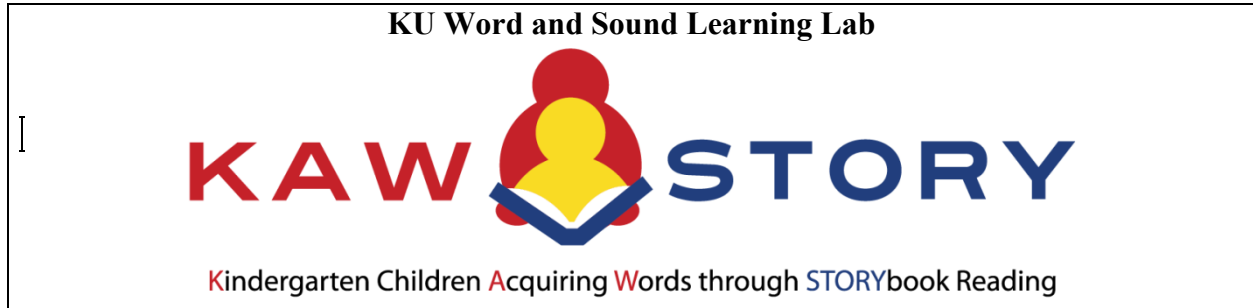

**TREATMENT INTENSITY CONDITION**  
**36 4 dose X 9 dose frequency**  
**Set A = Treated Words**

## KU Word and Sound Learning Lab

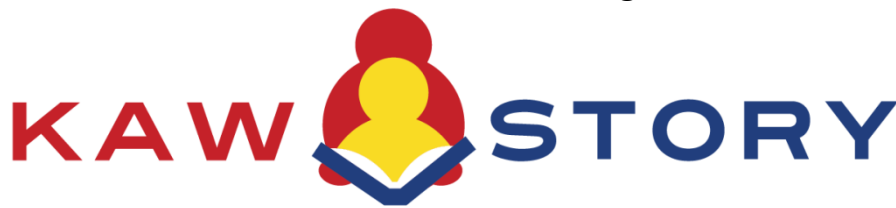

Kindergarten Children Acquiring Words through STORYbook Reading

### TREATMENT CHECKLIST

#### SUBJECT INFORMATION

KAW Number: \_\_\_\_\_ Initials: \_\_\_\_\_

Preliminary Evaluation Dates: \_\_\_\_\_ Examiner(s): \_\_\_\_\_

Pre-treatment Testing Dates: \_\_\_\_\_ Examiner(s) (blind): \_\_\_\_\_

#### INTENSITY CONDITION:

**36 4-9 (each book 9 times)**      **6-6 (each book 6 times)**      **9-4 (each book 4 times)**

**VERSION CONDITION:** \_\_\_\_\_ **VERSION A**      **VERSION B**

| Treatment                              | Control                                 |
|----------------------------------------|-----------------------------------------|
| Book 1: Imogene's Antlers              | Book 1: Caterpillar that Roared         |
| Book 2: Otis                           | Book 2: What do you do with a Kangaroo? |
| Book 3: Shy Charles                    | Book 3: Bear Under the Stairs           |
| Book 4: Harry and the Terrible Whatzit | Book 4: Book! Book! Book!               |
| Book 5: Possum and the Peeper          | Book 5: Swimmy                          |

**TREATMENT PROVIDER (LIST ALL IF MORE THAN ONE):** \_\_\_\_\_

#### SESSION SCHEDULE (2-3 SESSIONS PER WEEK)

**INTENSITY 36: DOSE 4 (2 SESSIONS PER WEEK = 11 ½ WEEKS OR 3 SESSIONS PER WEEK = 7 ½ WEEKS)**

| Session 1.1:                                          | Session 1.2:                                                              |
|-------------------------------------------------------|---------------------------------------------------------------------------|
| Book 1 (1st): Imogene's Antlers<br>Book 2 (1st): Otis | Book 3 (1st): Shy Charles<br>Book 4 (1st): Harry and the Terrible Whatzit |

| Session 1.3:                                                           | Session 1.4:                                                       |
|------------------------------------------------------------------------|--------------------------------------------------------------------|
| Book 5 (1st): Possum and the Peeper<br>Book 1 (2nd): Imogene's Antlers | Book 2 (2nd): Otis<br>Book 4 (2nd): Harry and the Terrible Whatzit |

| Session 1.5:                                                     | Session 1.6:                                                                    |
|------------------------------------------------------------------|---------------------------------------------------------------------------------|
| Book 3 (2nd): Shy Charles<br>Book 5 (2nd): Possum and the Peeper | Book 1 (3rd): Imogene's Antlers<br>Book 4 (3rd): Harry and the Terrible Whatzit |

| <b>Session 1.7:</b>                                       | <b>Session 1.8:</b>                                          |
|-----------------------------------------------------------|--------------------------------------------------------------|
| Book 2 (3rd): Otis<br>Book 5 (3rd): Possum and the Peeper | Book 3 (3rd): Shy Charles<br>Book 1 (4th): Imogene's Antlers |

| <b>Session 1.9:</b>                                                | <b>Session 1.10:</b>                                             |
|--------------------------------------------------------------------|------------------------------------------------------------------|
| Book 4 (4th): Harry and the Terrible Whatzit<br>Book 2 (4th): Otis | Book 5 (4th): Possum and the Peeper<br>Book 3 (4th): Shy Charles |

| <b>Session 1.11:</b>                                  | <b>Session 1.12:</b>                                                      |
|-------------------------------------------------------|---------------------------------------------------------------------------|
| Book 2 (5th): Otis<br>Book 1 (5th): Imogene's Antlers | Book 4 (5th): Harry and the Terrible Whatzit<br>Book 3 (5th): Shy Charles |

| <b>Session 1.13:</b>                                                   | <b>Session 1.14:</b>                                               |
|------------------------------------------------------------------------|--------------------------------------------------------------------|
| Book 1 (6th): Imogene's Antlers<br>Book 5 (5th): Possum and the Peeper | Book 4 (6th): Harry and the Terrible Whatzit<br>Book 2 (6th): Otis |

| <b>Session 1.15:</b>                                             | <b>Session 1.16:</b>                                                            |
|------------------------------------------------------------------|---------------------------------------------------------------------------------|
| Book 5 (6th): Possum and the Peeper<br>Book 3 (6th): Shy Charles | Book 4 (7th): Harry and the Terrible Whatzit<br>Book 1 (7th): Imogene's Antlers |

| <b>Session 1.17:</b>                                      | <b>Session 1.18:</b>                                         |
|-----------------------------------------------------------|--------------------------------------------------------------|
| Book 5 (7th): Possum and the Peeper<br>Book 2 (7th): Otis | Book 1 (8th): Imogene's Antlers<br>Book 3 (7th): Shy Charles |

| <b>Session 1.19:</b>                                               | <b>Session 1.20:</b>                                             |
|--------------------------------------------------------------------|------------------------------------------------------------------|
| Book 2 (8th): Otis<br>Book 4 (8th): Harry and the Terrible Whatzit | Book 3 (8th): Shy Charles<br>Book 5 (8th): Possum and the Peeper |

| <b>Session 1.21:</b>                                  | <b>Session 1.22:</b>                                                      |
|-------------------------------------------------------|---------------------------------------------------------------------------|
| Book 1 (9th): Imogene's Antlers<br>Book 2 (9th): Otis | Book 3 (9th): Shy Charles<br>Book 4 (9th): Harry and the Terrible Whatzit |

| <b>Session 1.23:</b>                |
|-------------------------------------|
| Book 5 (9th): Possum and the Peeper |

Post-treatment Testing Dates: \_\_\_\_\_ Examiner (blind): \_\_\_\_\_

Participant Number: \_\_\_\_\_ Examiner: \_\_\_\_\_ Date: \_\_\_\_\_  
 Treatment Session Number: \_\_\_\_\_ Dose = 4; Dose Frequency = 9  
 Dose Frequency for this Training (circle 1): 1 2 3 4 5 6 7 8 9

Videotape Number: \_\_\_\_\_ Start time: \_\_\_\_\_ End time: \_\_\_\_\_ Session Length: \_\_\_\_\_

**Preview (Definition + Synonym):**

**SAY:** "Let's look at some of the words we'll hear in our storybook."

| <b><u>SHOW Definition</u></b><br><b><u>Picture and SAY</u></b> | <b><u>SAY Definition</u></b>                                            | √ | <b><u>SAY Synonym</u></b>                     | √ | <b>X</b><br><b>exposure</b> |
|----------------------------------------------------------------|-------------------------------------------------------------------------|---|-----------------------------------------------|---|-----------------------------|
| <b>P 1.</b> Tell me what <b><i>advice</i></b> means.           | <b><i>Advice</i></b> means an idea used to help people to make choices. |   | <b><i>Advice</i></b> is like help.            |   |                             |
| <b>Response</b>                                                |                                                                         |   |                                               |   |                             |
| <b>P 2.</b> Tell me what <b><i>glared</i></b> means.           | <b><i>Glared</i></b> means to look at someone in an angry way.          |   | <b><i>Glared</i></b> is like stared.          |   |                             |
| <b>Response</b>                                                |                                                                         |   |                                               |   |                             |
| <b>P 3.</b> Tell me what <b><i>overjoyed</i></b> means.        | <b><i>Overjoyed</i></b> means filled with joy; very happy.              |   | <b><i>Overjoyed</i></b> is like excited.      |   |                             |
| <b>Response</b>                                                |                                                                         |   |                                               |   |                             |
| <b>P 4.</b> Tell me what <b><i>prodded</i></b> means.          | <b><i>Prodded</i></b> means to poke someone with something pointed.     |   | <b><i>Prodded</i></b> is like pushed.         |   |                             |
| <b>Response</b>                                                |                                                                         |   |                                               |   |                             |
| <b>P 5.</b> Tell me what <b><i>rare</i></b> means.             | <b><i>Rare</i></b> means it is not often found or seen.                 |   | <b><i>Rare</i></b> is like not usual.         |   |                             |
| <b>Response</b>                                                |                                                                         |   |                                               |   |                             |
| <b>P 6.</b> Tell me what <b><i>wandered</i></b> means.         | <b><i>Wandered</i></b> means to move about from place to place.         |   | <b><i>Wandered</i></b> is like walked slowly. |   |                             |
| <b>Response</b>                                                |                                                                         |   |                                               |   |                             |
| <b>Notes on extra exposure</b>                                 |                                                                         |   |                                               |   |                             |

**CONTINUE TO NEXT PAGE FOR BOOK READING**

**Book Reading (Text):**

**SAY:** “Let’s read our storybook and listen for those words!”

| <b><u>SHOW</u><br/>Book<br/>Picture</b> | <b><u>READ</u> Text</b>                                                                                                                        | √ | <b>X<br/>exposure</b> |
|-----------------------------------------|------------------------------------------------------------------------------------------------------------------------------------------------|---|-----------------------|
| <b>Page 8</b>                           | “The doctor poked, and <b><i>prodded</i></b> .”                                                                                                |   |                       |
| <b>Page 9</b>                           | “The school principal <b><i>glared</i></b> at Imogene . . .”                                                                                   |   |                       |
| <b>Page 9</b>                           | “But the principal had no <b><i>advice</i></b> to offer.”                                                                                      |   |                       |
| <b>Page 10</b>                          | “Her brother, Norman, consulted the encyclopedia, and then announced that Imogene had turned into a <b><i>rare</i></b> form of miniature elk!” |   |                       |
| <b>Page 16</b>                          | “Later, Imogene <b><i>wandered</i></b> upstairs.”                                                                                              |   |                       |
| <b>Page 25</b>                          | -“When she came down to breakfast, the family was <b><i>overjoyed</i></b> to see her back to normal...”                                        |   |                       |
| <b>Notes on extra exposure:</b>         |                                                                                                                                                |   |                       |

**CONTINUE TO NEXT PAGE FOR REVIEW**

**Review (Context):**

**SAY** “Let’s think about the different words from our storybook.”

| <b><u>SHOW</u> Context<br/>Picture and <u>SAY</u></b>      | <b><u>SAY</u> Context</b>                                                                 | √ | <b>X</b><br>exposure |
|------------------------------------------------------------|-------------------------------------------------------------------------------------------|---|----------------------|
| R 1. What did they do?                                     | [Click] While waiting for soccer practice to start, we <i>wandered</i> around the school. |   |                      |
| <b>Response (transcribe and highlight if questionable)</b> |                                                                                           |   |                      |
| R 2. What kind of elephant is this?                        | [Click] It is <i>rare</i> to see an elephant in a big city.                               |   |                      |
| <b>Response (transcribe and highlight if questionable)</b> |                                                                                           |   |                      |
| R 3. What did he do with his stick?                        | [Click] The farmer <i>prodded</i> the cow to move it into the fence.                      |   |                      |
| <b>Response (transcribe and highlight if questionable)</b> |                                                                                           |   |                      |
| R 4. How does he feel?                                     | [Click] He was <i>overjoyed</i> to get a puppy for his birthday.                          |   |                      |
| <b>Response (transcribe and highlight if questionable)</b> |                                                                                           |   |                      |
| R 5. What did she do?                                      | [Click] I <i>glared</i> at my sister after she took my toy from me.                       |   |                      |
| <b>Response (transcribe and highlight if questionable)</b> |                                                                                           |   |                      |
| R 6. What is he telling the boy?                           | [Click] Dad gave me <i>advice</i> on how to make more friends at school.                  |   |                      |
| <b>Response (transcribe and highlight if questionable)</b> |                                                                                           |   |                      |
| <b>Notes on extra exposure:</b>                            |                                                                                           |   |                      |

Participant Number: \_\_\_\_\_ Examiner: \_\_\_\_\_ Date: \_\_\_\_\_  
 Treatment Session Number: \_\_\_\_\_ Dose = 4; Dose Frequency = 9  
 Dose Frequency for this Training (circle 1): 1 2 3 4 5 6 7 8 9

Videotape Number: \_\_\_\_\_ Start time: \_\_\_\_\_ End time: \_\_\_\_\_ Session Length: \_\_\_\_\_

**Preview (Definition + Synonym):**

**SAY:** "Let's look at some of the words we'll hear in our storybook."

| <b><u>SHOW</u> Definition<br/>Picture and SAY</b>       | <b><u>SAY</u> Definition</b>                                                         | √ | <b><u>SAY</u> Synonym</b>                        | √ | <b>X<br/>exposure</b> |
|---------------------------------------------------------|--------------------------------------------------------------------------------------|---|--------------------------------------------------|---|-----------------------|
| <b>P 1.</b> Tell me what <b><i>hauled</i></b> means.    | <b><i>Hauled</i></b> means carried with force or effort.                             |   | <b><i>Hauled</i></b> is like dragged.            |   |                       |
| <b>Response</b>                                         |                                                                                      |   |                                                  |   |                       |
| <b>P 2.</b> Tell me what <b><i>hooves</i></b> means.    | <b><i>Hooves</i></b> means hard parts on the feet of animals like horses or pigs.    |   | <b><i>Hooves</i></b> are like feet.              |   |                       |
| <b>Response</b>                                         |                                                                                      |   |                                                  |   |                       |
| <b>P 3.</b> Tell me what <b><i>ripe</i></b> means.      | <b><i>Ripe</i></b> means full grown and good to pick or eat.                         |   | <b><i>Ripe</i></b> is like ready.                |   |                       |
| <b>Response</b>                                         |                                                                                      |   |                                                  |   |                       |
| <b>P 4.</b> Tell me what <b><i>sidelines</i></b> means. | <b><i>Sidelines</i></b> means lines marking the sides of fields or courts in sports. |   | <b><i>Sidelines</i></b> are like boundary lines. |   |                       |
| <b>Response</b>                                         |                                                                                      |   |                                                  |   |                       |
| <b>P 5.</b> Tell me what <b><i>silky</i></b> means.     | <b><i>Silky</i></b> means soft, like a material used to make clothes.                |   | <b><i>Silky</i></b> is like shiny.               |   |                       |
| <b>Response</b>                                         |                                                                                      |   |                                                  |   |                       |
| <b>P 6.</b> Tell me what <b><i>spotless</i></b> means.  | <b><i>Spotless</i></b> means without any dirt or spots.                              |   | <b><i>Spotless</i></b> is like very clean.       |   |                       |
| <b>Response</b>                                         |                                                                                      |   |                                                  |   |                       |
| <b>Notes on extra exposure:</b>                         |                                                                                      |   |                                                  |   |                       |

**CONTINUE TO NEXT PAGE FOR BOOK READING**

**Book Reading (Text):**

**SAY:** “Let’s read our storybook and listen for those words!”

| <b><u>SHOW</u><br/>Book<br/>Picture</b> | <b><u>READ</u> Text</b>                                                                         | √ | <b>X<br/>exposure</b> |
|-----------------------------------------|-------------------------------------------------------------------------------------------------|---|-----------------------|
| <b>Page 1</b>                           | “He had soft, <b><i>silky</i></b> hairs.”                                                       |   |                       |
| <b>Page 5</b>                           | “When his brothers played rugby in the swamp, Otis kept score on the <b><i>sidelines</i></b> .” |   |                       |
| <b>Page 9</b>                           | “Otis tried very hard to remain a <b><i>spotless</i></b> pig.”                                  |   |                       |
| <b>Page 13</b>                          | “Otis imagined mud oozing around his <b><i>hooves</i></b> .”                                    |   |                       |
| <b>Page 16</b>                          | “While his brothers weeded the corn, Otis <b><i>hauled</i></b> the weeds away.”                 |   |                       |
| <b>Page 17</b>                          | “Otis’s sisters picked the <b><i>ripe</i></b> corn.”                                            |   |                       |

**Notes on extra exposure:**

**CONTINUE TO NEXT PAGE FOR REVIEW**



**Review (Context):**

**SAY** “Let’s think about the different words from our storybook.”

| <b><u>SHOW</u> Context<br/><u>Picture and SAY</u></b>      | <b><u>SAY</u> Context</b>                                                                    | √ | <b>X</b><br>exposure |
|------------------------------------------------------------|----------------------------------------------------------------------------------------------|---|----------------------|
| R 1. How does the car look?                                | <b>[Click]</b> After washing the car with lots of soap, it looked <b>spotless</b> .          |   |                      |
| <b>Response (transcribe and highlight if questionable)</b> |                                                                                              |   |                      |
| R 2. How is the dress?                                     | <b>[Click]</b> Mom went to the store and bought a new <b>silky</b> dress.                    |   |                      |
| <b>Response (transcribe and highlight if questionable)</b> |                                                                                              |   |                      |
| R 3. Where is he sitting?                                  | <b>[Click]</b> My brother was hurt so he sat on the <b>sidelines</b> at the soccer game.     |   |                      |
| <b>Response (transcribe and highlight if questionable)</b> |                                                                                              |   |                      |
| R 4. How are the strawberries?                             | <b>[Click]</b> I like to eat <b>ripe</b> strawberries in the summertime.                     |   |                      |
| <b>Response (transcribe and highlight if questionable)</b> |                                                                                              |   |                      |
| R 5. What are these? [point to hooves]                     | <b>[Click]</b> The horses kicked each other with their <b>hooves</b> when they were playing. |   |                      |
| <b>Response (transcribe and highlight if questionable)</b> |                                                                                              |   |                      |
| R 6. What did the man do?                                  | <b>[Click]</b> Dad <b>hauled</b> all of our heavy trash to the big trash can.                |   |                      |
| <b>Response (transcribe and highlight if questionable)</b> |                                                                                              |   |                      |
| <b>Notes on extra exposure:</b>                            |                                                                                              |   |                      |

Participant Number: \_\_\_\_\_ Examiner: \_\_\_\_\_ Date: \_\_\_\_\_  
 Treatment Session Number: \_\_\_\_\_ Dose = 4; Dose Frequency = 9  
 Dose Frequency for this Training (circle 1): 1 2 3 4 5 6 7 8 9

Videotape Number: \_\_\_\_\_ Start time: \_\_\_\_\_ End time: \_\_\_\_\_ Session Length: \_\_\_\_\_

**Preview (Definition + Synonym):**

**SAY:** "Let's look at some of the words we'll hear in our storybook."

| <b><u>SHOW</u> Definition<br/>Picture and <u>SAY</u></b>  | <b><u>SAY</u> Definition</b>                                                       | √ | <b><u>SAY</u> Synonym</b>                        | √ | <b>X<br/>exposure</b> |
|-----------------------------------------------------------|------------------------------------------------------------------------------------|---|--------------------------------------------------|---|-----------------------|
| <b>P 1.</b> Tell me what <b><i>embarrassed</i></b> means. | <b><i>Embarrassed</i></b> means to have felt foolish or upset.                     |   | <b><i>Embarrassed</i></b> is like uncomfortable. |   |                       |
| <b>Response</b>                                           |                                                                                    |   |                                                  |   |                       |
| <b>P 2.</b> Tell me what <b><i>murmured</i></b> means.    | <b><i>Murmured</i></b> means to have spoken in a soft, low sound.                  |   | <b><i>Murmured</i></b> is like mumbled.          |   |                       |
| <b>Response</b>                                           |                                                                                    |   |                                                  |   |                       |
| <b>P 3.</b> Tell me what <b><i>nervous</i></b> means.     | <b><i>Nervous</i></b> means feeling scared or showing tension.                     |   | <b><i>Nervous</i></b> is like worried.           |   |                       |
| <b>Response</b>                                           |                                                                                    |   |                                                  |   |                       |
| <b>P 4.</b> Tell me what <b><i>scarlet</i></b> means.     | <b><i>Scarlet</i></b> means a bright red color.                                    |   | <b><i>Scarlet</i></b> is like very red.          |   |                       |
| <b>Response</b>                                           |                                                                                    |   |                                                  |   |                       |
| <b>P 5.</b> Tell me what <b><i>success</i></b> means.     | <b><i>Success</i></b> means a person that does well or a thing that goes well.     |   | <b><i>Success</i></b> is like a win.             |   |                       |
| <b>Response</b>                                           |                                                                                    |   |                                                  |   |                       |
| <b>P 6.</b> Tell me what <b><i>trembled</i></b> means.    | <b><i>Trembled</i></b> means to have shivered from being scared, cold, or excited. |   | <b><i>Trembled</i></b> is like shook.            |   |                       |
| <b>Response</b>                                           |                                                                                    |   |                                                  |   |                       |
| <b>Notes on extra exposure:</b>                           |                                                                                    |   |                                                  |   |                       |

**CONTINUE TO NEXT PAGE FOR BOOK READING**

**Book Reading (Text):****SAY:** “Let’s read our storybook and listen for those words!”

| <b><u>SHOW</u><br/>Book<br/>Picture</b> | <b><u>READ</u> Text</b>                                      | √ | X<br>exposure |
|-----------------------------------------|--------------------------------------------------------------|---|---------------|
| <b>Page 8</b>                           | “I’m so <b><i>embarrassed</i></b> ,’ said Charles’s mother.” |   |               |
| <b>Page 13</b>                          | “Charles was not a <b><i>success</i></b> .”                  |   |               |
| <b>Page 14</b>                          | “The shirt was <b><i>scarlet</i></b> with shoulder pads.”    |   |               |
| <b>Page 16</b>                          | “Charles <b><i>trembled</i></b> like an autumn leaf.”        |   |               |
| <b>Page 19</b>                          | “Then Charles’s father <b><i>murmured</i></b> low”           |   |               |
| <b>Page 24</b>                          | “He told her, ‘Now, don’t be <b><i>nervous!</i></b> ’”       |   |               |
| <b>Notes on extra exposure:</b>         |                                                              |   |               |

**CONTINUE TO NEXT PAGE FOR REVIEW**

**Review (Context):****SAY** "Let's think about the different words from our storybook."

| <b><u>SHOW Context</u></b><br><b><u>Picture and SAY</u></b> | <b><u>SAY Context</u></b>                                                               | √ | <b>X</b><br><b>exposure</b> |
|-------------------------------------------------------------|-----------------------------------------------------------------------------------------|---|-----------------------------|
| <b>R 1.</b> What did the mailman do?                        | <b>[Click]</b> The mailman <i>trembled</i> because a mean dog barked at him.            |   |                             |
| <b>Response (transcribe and highlight if questionable)</b>  |                                                                                         |   |                             |
| <b>R 2.</b> What did they achieve?                          | <b>[Click]</b> The game was a <i>success</i> and the team was happy they won.           |   |                             |
| <b>Response (transcribe and highlight if questionable)</b>  |                                                                                         |   |                             |
| <b>R 3.</b> What color are her clothes?                     | <b>[Click]</b> Her favorite color was <i>scarlet</i> and she wore it every day.         |   |                             |
| <b>Response (transcribe and highlight if questionable)</b>  |                                                                                         |   |                             |
| <b>R 5.</b> How does she feel?                              | <b>[Click]</b> The young girl was <i>nervous</i> about her first day at her new school. |   |                             |
| <b>Response (transcribe and highlight if questionable)</b>  |                                                                                         |   |                             |
| <b>R 6.</b> What did the girl do?                           | <b>[Click]</b> Sarah <i>murmured</i> the secret to her best friends at lunch time.      |   |                             |
| <b>Response (transcribe and highlight if questionable)</b>  |                                                                                         |   |                             |
| <b>R 7.</b> How does he feel?                               | <b>[Click]</b> The boy was <i>embarrassed</i> because a girl gave him a gift at school. |   |                             |
| <b>Response (transcribe and highlight if questionable)</b>  |                                                                                         |   |                             |
| <b>Notes on extra exposure:</b>                             |                                                                                         |   |                             |

Participant Number: \_\_\_\_\_ Examiner: \_\_\_\_\_ Date: \_\_\_\_\_  
 Treatment Session Number: \_\_\_\_\_ Dose = 4; Dose Frequency = 9  
 Dose Frequency for this Training (circle 1): 1 2 3 4 5 6 7 8 9

Videotape Number: \_\_\_\_\_ Start time: \_\_\_\_\_ End time: \_\_\_\_\_ Session Length: \_\_\_\_\_

**Preview (Definition + Synonym):**

**SAY:** "Let's look at some of the words we'll hear in our storybook."

| <b><u>SHOW</u> Definition<br/>Picture and <u>SAY</u></b> | <b><u>SAY</u> Definition</b>                                           | √ | <b><u>SAY</u> Synonym</b>           | √ | <b>X<br/>exposure</b> |
|----------------------------------------------------------|------------------------------------------------------------------------|---|-------------------------------------|---|-----------------------|
| <b>P 1.</b><br>Tell me what <b>damp</b> means.           | <b>Damp</b> means barely wet or moist.                                 |   | <b>Damp</b> is like a little soggy. |   |                       |
| <b>Response</b>                                          |                                                                        |   |                                     |   |                       |
| <b>P 2.</b><br>Tell me what <b>discovered</b> means.     | <b>Discovered</b> means to have seen something first.                  |   | <b>Discovered</b> is like found.    |   |                       |
| <b>Response</b>                                          |                                                                        |   |                                     |   |                       |
| <b>P 3.</b><br>Tell me what <b>furnace</b> means.        | <b>Furnace</b> means something used to make heat to warm buildings.    |   | A <b>furnace</b> is like a heater.  |   |                       |
| <b>Response</b>                                          |                                                                        |   |                                     |   |                       |
| <b>P 4.</b><br>Tell me what <b>gloomy</b> means.         | <b>Gloomy</b> means having very little light.                          |   | <b>Gloomy</b> is like dark.         |   |                       |
| <b>Response</b>                                          |                                                                        |   |                                     |   |                       |
| <b>P 5.</b><br>Tell me what <b>swat</b> means.           | <b>Swat</b> means to hit quickly using an open hand or something else. |   | <b>Swat</b> is like slap.           |   |                       |
| <b>Response</b>                                          |                                                                        |   |                                     |   |                       |
| <b>P 6.</b><br>Tell me what <b>swung</b> means.          | <b>Swung</b> means to have caused to move back and forth.              |   | <b>Swung</b> is like spun.          |   |                       |
| <b>Response</b>                                          |                                                                        |   |                                     |   |                       |
| <b>Notes on extra exposure:</b>                          |                                                                        |   |                                     |   |                       |

**CONTINUE TO NEXT PAGE FOR BOOK READING**

**Book Reading (Text):****SAY:** “Let’s read our storybook and listen for those words!”

| <b><u>SHOW</u><br/>Book<br/>Picture</b> | <b><u>READ</u> Text</b>                                                                  | √ | X<br>exposure |
|-----------------------------------------|------------------------------------------------------------------------------------------|---|---------------|
| <b>Page 1</b>                           | “I just knew, because the cellar was dark and <b>damp</b> and it smelled.”               |   |               |
| <b>Page 6</b>                           | “It was very black and <b>gloomy</b> .”                                                  |   |               |
| <b>Page 8</b>                           | “It was hiding behind the <b>furnace</b> .”                                              |   |               |
| <b>Page 11</b>                          | “...and I gave it a <b>swat</b> with the broom. WHAM!”                                   |   |               |
| <b>Page 13</b>                          | “I <b>swung</b> the broom again. WHAM!”                                                  |   |               |
| <b>Page 23</b>                          | “I was searching for more clues when I <b>discovered</b> the back cellar door was open.” |   |               |
| <b>Notes on extra exposure:</b>         |                                                                                          |   |               |

**CONTINUE TO NEXT PAGE FOR REVIEW**

**Review (Context):**

**SAY** “Let’s think about the different words from our storybook.”

| <b>SHOW Context<br/>Picture and SAY</b>                    | <b>SAY Context</b>                                                          | √ | <b>X<br/>exposure</b> |
|------------------------------------------------------------|-----------------------------------------------------------------------------|---|-----------------------|
| R 1. What has he done?                                     | [Click] The baseball player <i>swung</i> the bat and hit the ball.          |   |                       |
| <b>Response (transcribe and highlight if questionable)</b> |                                                                             |   |                       |
| R 2. What does the woman do?                               | [Click] I wanted to <i>swat</i> the fly so that it would go away.           |   |                       |
| <b>Response (transcribe and highlight if questionable)</b> |                                                                             |   |                       |
| R 3. How is the sky?                                       | [Click] The gray and <i>gloomy</i> sky was filled with rain clouds.         |   |                       |
| <b>Response (transcribe and highlight if questionable)</b> |                                                                             |   |                       |
| R 4. What’s this?                                          | [Click] In the farm house, Mom saw an old <i>furnace</i> that was very hot. |   |                       |
| <b>Response (transcribe and highlight if questionable)</b> |                                                                             |   |                       |
| R 5. What did he do?                                       | [Click] The boy <i>discovered</i> a secret pile of candy in the kitchen.    |   |                       |
| <b>Response (transcribe and highlight if questionable)</b> |                                                                             |   |                       |
| R 6. How are their clothes?                                | [Click] After playing in the water, our clothes were <i>damp</i> .          |   |                       |
| <b>Response (transcribe and highlight if questionable)</b> |                                                                             |   |                       |
| <b>Notes on extra exposure:</b>                            |                                                                             |   |                       |

Participant Number: \_\_\_\_\_ Examiner: \_\_\_\_\_ Date: \_\_\_\_\_  
 Treatment Session Number: \_\_\_\_\_ Dose = 4; Dose Frequency = 9  
 Dose Frequency for this Training (circle 1): 1 2 3 4 5 6 7 8 9

Videotape Number: \_\_\_\_\_ Start time: \_\_\_\_\_ End time: \_\_\_\_\_ Session Length: \_\_\_\_\_

**Preview (Definition + Synonym):**

**SAY:** "Let's look at some of the words we'll hear in our storybook."

| <b><u>SHOW</u> Definition<br/>Picture and <u>SAY</u></b> | <b><u>SAY</u> Definition</b>                                                   | √ | <b><u>SAY</u> Synonym</b>                 | √ | <b>X<br/>exposure</b> |
|----------------------------------------------------------|--------------------------------------------------------------------------------|---|-------------------------------------------|---|-----------------------|
| <b>P 1.</b> Tell me what <b><i>clamor</i></b> means.     | <b><i>Clamor</i></b> means a loud sound that goes on for some time.            |   | <b><i>Clamor</i></b> is like noise.       |   |                       |
| <b>Response</b>                                          |                                                                                |   |                                           |   |                       |
| <b>P 2.</b> Tell me what <b><i>grumbling</i></b> means.  | <b><i>Grumbling</i></b> means complaining in a low voice.                      |   | <b><i>Grumbling</i></b> is like whining.  |   |                       |
| <b>Response</b>                                          |                                                                                |   |                                           |   |                       |
| <b>P 3.</b> Tell me what <b><i>marsh</i></b> means.      | <b><i>Marsh</i></b> means a low, wet land, often thick with tall grasses.      |   | <b><i>Marsh</i></b> is like a swamp.      |   |                       |
| <b>Response</b>                                          |                                                                                |   |                                           |   |                       |
| <b>P 4.</b> Tell me what <b><i>peering</i></b> means.    | <b><i>Peering</i></b> means looking hard or closely to see something better.   |   | <b><i>Peering</i></b> is like staring.    |   |                       |
| <b>Response</b>                                          |                                                                                |   |                                           |   |                       |
| <b>P 5.</b> Tell me what <b><i>racket</i></b> means.     | <b><i>Racket</i></b> means a loud noise that bothers you.                      |   | <b><i>Racket</i></b> is like a big sound. |   |                       |
| <b>Response</b>                                          |                                                                                |   |                                           |   |                       |
| <b>P 6.</b> Tell me what <b><i>squinting</i></b> means.  | <b><i>Squinting</i></b> means looking at something through partly closed eyes. |   | <b><i>Squinting</i></b> is like peeking.  |   |                       |
| <b>Response</b>                                          |                                                                                |   |                                           |   |                       |
| <b>Notes on extra exposure</b>                           |                                                                                |   |                                           |   |                       |

**CONTINUE TO NEXT PAGE FOR BOOK READING**



**Book Reading (Text):**

**SAY:** “Let’s read our storybook and listen for those words!”

| <b><u>SHOW</u><br/>Book<br/>Picture</b> | <b><u>READ</u> Text</b>                                                                                | √ | <b>X<br/>exposure</b> |
|-----------------------------------------|--------------------------------------------------------------------------------------------------------|---|-----------------------|
| <b>Page 5</b>                           | -“We can scarcely hear ourselves sing with all that <i>clamor</i> .”                                   |   |                       |
| <b>Page 12</b>                          | -“They continued over the hill, the catbirds flying overhead, the bear <i>grumbling</i> along behind.” |   |                       |
| <b>Page 15</b>                          | -“They came down to a <i>marsh</i> .”                                                                  |   |                       |
| <b>Page 16</b>                          | -“They pressed on, following the muskrat, <i>peering</i> between new green shoots.”                    |   |                       |
| <b>Page 21</b>                          | -“AH HA!” they cried, <i>squinting</i> at a small spot on the bank.”                                   |   |                       |
| <b>Page 21</b>                          | -“How could such a speck of a thing make such a huge <i>racket</i> ?” asked the bear.”                 |   |                       |
| <b>Notes on extra exposure:</b>         |                                                                                                        |   |                       |

**CONTINUE TO NEXT PAGE FOR REVIEW**

**Review (Context):**

**SAY** “Let’s think about the different words from our storybook.”

| <b><u>SHOW Context</u><br/><u>Picture and SAY</u></b>      | <b><u>SAY Context</u></b>                                                                      | √ | X<br>exposure |
|------------------------------------------------------------|------------------------------------------------------------------------------------------------|---|---------------|
| <b>R 1.</b> What is he doing with his eyes?                | <b>[Click]</b> He was <i>squinting</i> while reading the paper because it was so small.        |   |               |
| <b>Response (transcribe and highlight if questionable)</b> |                                                                                                |   |               |
| <b>R 2.</b> What does she hear?                            | <b>[Click]</b> The teacher asked the class to stop making <i>racket</i> during silent reading. |   |               |
| <b>Response (transcribe and highlight if questionable)</b> |                                                                                                |   |               |
| <b>R 3.</b> What are they doing?                           | <b>[Click]</b> When <i>peering</i> out the window, they saw deer in the field.                 |   |               |
| <b>Response (transcribe and highlight if questionable)</b> |                                                                                                |   |               |
| <b>R 4.</b> Where are the animals?                         | <b>[Click]</b> Ducks and beavers live in a <i>marsh</i> because they like the water.           |   |               |
| <b>Response (transcribe and highlight if questionable)</b> |                                                                                                |   |               |
| <b>R 5.</b> What is he doing?                              | <b>[Click]</b> He was <i>grumbling</i> because his mother made him clean his room.             |   |               |
| <b>Response (transcribe and highlight if questionable)</b> |                                                                                                |   |               |
| <b>R 6.</b> What were the people making?                   | <b>[Click]</b> I covered my ears because the people were making a <i>clamor</i> .              |   |               |
| <b>Response (transcribe and highlight if questionable)</b> |                                                                                                |   |               |
| <b>Notes on extra exposure:</b>                            |                                                                                                |   |               |

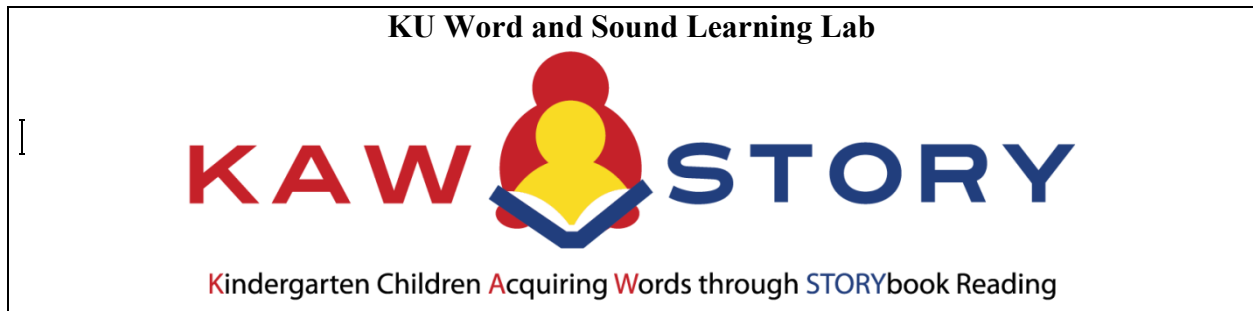

**TREATMENT INTENSITY CONDITION**  
**36 4 dose X 9 dose frequency**  
**Set B = Treated Words**

## KU Word and Sound Learning Lab

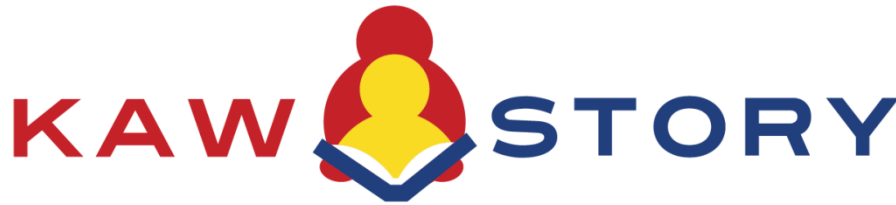

Kindergarten Children Acquiring Words through STORYbook Reading

### TREATMENT CHECKLIST

#### SUBJECT INFORMATION

KAW Number: \_\_\_\_\_

Initials: \_\_\_\_\_

Preliminary Evaluation Dates: \_\_\_\_\_

Examiner(s): \_\_\_\_\_

Pre-treatment Testing Dates: \_\_\_\_\_

Examiner(s) (blind): \_\_\_\_\_

#### INTENSITY CONDITION:

**36 4-9 (each book 9 times)**

**6-6 (each book 6 times)**

**9-4 (each book 4 times)**

VERSION CONDITION: \_\_\_\_\_

VERSION A

VERSION B

| Treatment                               | Control                                |
|-----------------------------------------|----------------------------------------|
| Book 1: Caterpillar that Roared         | Book 1: Imogene's Antlers              |
| Book 2: What do you do with a Kangaroo? | Book 2: Otis                           |
| Book 3: Bear Under the Stairs           | Book 3: Shy Charles                    |
| Book 4: Book! Book! Book!               | Book 4: Harry and the Terrible Whatzit |
| Book 5: Swimmy                          | Book 5: Possum and the Peeper          |

TREATMENT PROVIDER (LIST ALL IF MORE THAN ONE): \_\_\_\_\_

**SESSION SCHEDULE (2-3 SESSIONS PER WEEK)**

**INTENSITY 36: DOSE 4 (2 SESSIONS PER WEEK = 11 ½ WEEKS OR 3 SESSIONS PER WEEK = 7 ½ WEEKS)**

|                                                                                        |                                                                                  |
|----------------------------------------------------------------------------------------|----------------------------------------------------------------------------------|
| <b>Session 1.1:</b>                                                                    | <b>Session 1.2:</b>                                                              |
| Book 1 (1st): Caterpillar That Roared<br>Book 2 (1st): What Do You Do With a Kangaroo? | Book 3 (1st): Bear Under the Stairs<br>Book 4 (1st): Book! Book! Book!           |
| <b>Session 1.3:</b>                                                                    | <b>Session 1.4:</b>                                                              |
| Book 5 (1st): Swimmy<br>Book 1 (2nd): Caterpillar That Roared                          | Book 2 (2nd): What Do You Do With a Kangaroo?<br>Book 4 (2nd): Book! Book! Book! |
| <b>Session 1.5:</b>                                                                    | <b>Session 1.6:</b>                                                              |
| Book 3 (2nd): Bear Under the Stairs<br>Book 5 (2nd): Swimmy                            | Book 1 (3rd): Caterpillar That Roared<br>Book 4 (3rd): Book! Book! Book!         |
| <b>Session 1.7:</b>                                                                    | <b>Session 1.8:</b>                                                              |
| Book 2 (3rd): What Do You Do With a Kangaroo?<br>Book 5 (3rd): Swimmy                  | Book 3 (3rd): Bear Under the Stairs<br>Book 1 (4th): Caterpillar That Roared     |
| <b>Session 1.9:</b>                                                                    | <b>Session 1.10:</b>                                                             |
| Book 4 (4th): Book! Book! Book!<br>Book 2 (4th): What Do You Do With a Kangaroo?       | Book 5 (4th): Swimmy<br>Book 3 (4th): Bear Under the Stairs                      |
| <b>Session 1.11:</b>                                                                   | <b>Session 1.12:</b>                                                             |
| Book 2 (5th): What Do You Do With a Kangaroo?<br>Book 1 (5th): Caterpillar That Roared | Book 4 (5th): Book! Book! Book!<br>Book 3 (5th): Bear Under the Stairs           |
| <b>Session 1.13:</b>                                                                   | <b>Session 1.14:</b>                                                             |
| Book 1 (6th): Caterpillar That Roared<br>Book 5 (5th): Swimmy                          | Book 4 (6th): Book! Book! Book!<br>Book 2 (6th): What Do You Do With a Kangaroo? |
| <b>Session 1.15:</b>                                                                   | <b>Session 1.16:</b>                                                             |
| Book 5 (6th): Swimmy<br>Book 3 (6th): Bear Under the Stairs                            | Book 4 (7th): Book! Book! Book!<br>Book 1 (7th): Caterpillar That Roared         |
| <b>Session 1.17:</b>                                                                   | <b>Session 1.18:</b>                                                             |
| Book 5 (7th): Swimmy<br>Book 2 (7th): What do You Do With a Kangaroo?                  | Book 1 (8th): Caterpillar That Roared<br>Book 3 (7th): Bear Under the Stairs     |

| <b>Session 1.19:</b>                                                             | <b>Session 1.20:</b>                                        |
|----------------------------------------------------------------------------------|-------------------------------------------------------------|
| Book 2 (8th): What Do You Do With a Kangaroo?<br>Book 4 (8th): Book! Book! Book! | Book 3 (8th): Bear Under the Stairs<br>Book 5 (8th): Swimmy |

| <b>Session 1.21:</b>                                                                   | <b>Session 1.22:</b>                                                   |
|----------------------------------------------------------------------------------------|------------------------------------------------------------------------|
| Book 1 (9th): Caterpillar That Roared<br>Book 2 (9th): What Do You Do With a Kangaroo? | Book 3 (9th): Bear Under the Stairs<br>Book 4 (9th): Book! Book! Book! |

| <b>Session 1.23:</b> |
|----------------------|
| Book 5 (9th): Swimmy |

Post-treatment Testing Dates: \_\_\_\_\_ Examiner (blind): \_\_\_\_\_

Participant Number: \_\_\_\_\_ Examiner: \_\_\_\_\_ Date: \_\_\_\_\_  
 Treatment Session Number: \_\_\_\_\_ Dose = 4; Dose Frequency = 9  
 Dose Frequency for this Training (circle 1): 1 2 3 4 5 6 7 8 9

**Preview (Definition + Synonym):**

|                         |                   |                 |                       |
|-------------------------|-------------------|-----------------|-----------------------|
| Videotape Number: _____ | Start time: _____ | End time: _____ | Session Length: _____ |
|-------------------------|-------------------|-----------------|-----------------------|

**SAY:** "Let's look at some of the words we'll hear in our storybook."

| <b><u>SHOW</u> Definition<br/>Picture and <u>SAY</u></b> | <b><u>SAY</u> Definition</b>                                              | √ | <b><u>SAY</u> Synonym</b>                   | √ | <b>X<br/>exposure</b> |
|----------------------------------------------------------|---------------------------------------------------------------------------|---|---------------------------------------------|---|-----------------------|
| <b>P 1.</b> Tell me what <b><i>gaze</i></b> means.       | <b><i>Gaze</i></b> means to look at something for a long time.            |   | <b><i>Gaze</i></b> is like stare.           |   |                       |
| <b>Response</b>                                          |                                                                           |   |                                             |   |                       |
| <b>P 2.</b> Tell me what <b><i>horrified</i></b> means.  | <b><i>Horrified</i></b> means a feeling of being scared.                  |   | <b><i>Horrified</i></b> is like frightened. |   |                       |
| <b>Response</b>                                          |                                                                           |   |                                             |   |                       |
| <b>P 3.</b> Tell me what <b><i>ripples</i></b> means.    | <b><i>Ripples</i></b> mean small waves made from moving.                  |   | <b><i>Ripples</i></b> is like bumpy water.  |   |                       |
| <b>Response</b>                                          |                                                                           |   |                                             |   |                       |
| <b>P 4.</b> Tell me what <b><i>snuggled</i></b> means.   | <b><i>Snuggled</i></b> means to lay in a comfortable way next to someone. |   | <b><i>Snuggled</i></b> is like cuddled.     |   |                       |
| <b>Response</b>                                          |                                                                           |   |                                             |   |                       |
| <b>P 5.</b> Tell me what <b><i>surface</i></b> means.    | <b><i>Surface</i></b> means the outside part of something.                |   | <b><i>Surface</i></b> is like top.          |   |                       |
| <b>Response</b>                                          |                                                                           |   |                                             |   |                       |
| <b>P 6.</b> Tell me what <b><i>twitch</i></b> means.     | <b><i>Twitch</i></b> means to move quickly and suddenly.                  |   | <b><i>Twitch</i></b> is like shake.         |   |                       |
| <b>Response</b>                                          |                                                                           |   |                                             |   |                       |
| <b>Notes on extra exposure:</b>                          |                                                                           |   |                                             |   |                       |

**CONTINUE TO NEXT PAGE FOR BOOK READING**

**Book Reading (Text):****SAY:** “Let’s read our storybook and listen for those words!”

| <b><u>SHOW</u><br/>Book<br/>Picture</b> | <b><u>READ</u> Text</b>                                                                                                   | √ | <b>X<br/>exposure</b> |
|-----------------------------------------|---------------------------------------------------------------------------------------------------------------------------|---|-----------------------|
| <b>Page 2</b>                           | “Every morning when he woke up he would <b><i>gaze</i></b> at himself in the mirror.”                                     |   |                       |
| <b>Page 3</b>                           | “He would pull himself up as tall as he could, toss his imaginary mane, and <b><i>twitch</i></b> his imaginary whiskers.” |   |                       |
| <b>Page 17</b>                          | “Ferdinand the fish was preparing his dinner below the <b><i>surface</i></b> .”                                           |   |                       |
| <b>Page 17</b>                          | “Ferdinand saw a huge and fearsome creature through the <b><i>ripples</i></b> .”                                          |   |                       |
| <b>Page 21</b>                          | “Hugo was <b><i>horrified</i></b> .”                                                                                      |   |                       |
| <b>Page 24</b>                          | “That night, Hugo <b><i>snuggled</i></b> down to sleep.”                                                                  |   |                       |

**Notes on extra exposure:****CONTINUE TO NEXT PAGE FOR REVIEW**



**Review (Context):**

**SAY** “Let’s think about the different words from our storybook.”

| <b><u>SHOW</u> Context<br/>Picture and <u>SAY</u></b>      | <b><u>SAY</u> Context</b>                                                                  | √ | <b>X<br/>exposure</b> |
|------------------------------------------------------------|--------------------------------------------------------------------------------------------|---|-----------------------|
| R 1. What does the cow’s tail do?                          | <b>[Click]</b> The cow needed to <i>twitch</i> his tail to get the fly off his back.       |   |                       |
| <b>Response (transcribe and highlight if questionable)</b> |                                                                                            |   |                       |
| R 2. What part of the table did he paint?                  | <b>[Click]</b> The man painted the <i>surface</i> of the picnic table brown.               |   |                       |
| <b>Response (transcribe and highlight if questionable)</b> |                                                                                            |   |                       |
| R 3. What did the people do?                               | <b>[Click]</b> When I watched the movie, I <i>snuggled</i> next to my mom.                 |   |                       |
| <b>Response (transcribe and highlight if questionable)</b> |                                                                                            |   |                       |
| R 4. What are the bumps on the water?                      | <b>[Click]</b> My toes made small <i>ripples</i> in the swimming pool.                     |   |                       |
| <b>Response (transcribe and highlight if questionable)</b> |                                                                                            |   |                       |
| R 5. How did he feel?                                      | <b>[Click]</b> After going through the haunted house, he was <i>horrified</i> of ghosts.   |   |                       |
| <b>Response (transcribe and highlight if questionable)</b> |                                                                                            |   |                       |
| R 6. What does he do?                                      | <b>[Click]</b> The little boy likes to <i>gaze</i> at the TV when his favorite show is on. |   |                       |
| <b>Response (transcribe and highlight if questionable)</b> |                                                                                            |   |                       |
| <b>Notes on extra exposure:</b>                            |                                                                                            |   |                       |

Participant Number: \_\_\_\_\_ Examiner: \_\_\_\_\_ Date: \_\_\_\_\_  
 Treatment Session Number: \_\_\_\_\_ Dose = 4; Dose Frequency = 9  
 Dose Frequency for this Training (circle 1): 1 2 3 4 5 6

Videotape Number: \_\_\_\_\_ Start time: \_\_\_\_\_ End time: \_\_\_\_\_ Session Length: \_\_\_\_\_

**Preview (Definition + Synonym):**

**SAY:** "Let's look at some of the words we'll hear in our storybook."

| <u>SHOW</u> Definition<br>Picture and <u>SAY</u> | <u>SAY</u> Definition                                            | √ | <u>SAY</u> Synonym               | √ | X<br>exposure |
|--------------------------------------------------|------------------------------------------------------------------|---|----------------------------------|---|---------------|
| P 1. Tell me what <b>flashing</b> means.         | <b>Flashing</b> means a sudden bright light that goes away fast. |   | <b>Flashing</b> is like blazing. |   |               |
| <b>Response</b>                                  |                                                                  |   |                                  |   |               |
| P 2. Tell me what <b>frayed</b> means.           | <b>Frayed</b> means to have rubbed thin or come apart.           |   | <b>Frayed</b> is like torn.      |   |               |
| <b>Response</b>                                  |                                                                  |   |                                  |   |               |
| P 3. Tell me what <b>smooth</b> means.           | <b>Smooth</b> means flat and not rough.                          |   | <b>Smooth</b> is like even.      |   |               |
| <b>Response</b>                                  |                                                                  |   |                                  |   |               |
| P 4. Tell me what <b>stale</b> means.            | <b>Stale</b> means not fresh or not tasting good.                |   | <b>Stale</b> is like old.        |   |               |
| <b>Response</b>                                  |                                                                  |   |                                  |   |               |
| P 5. Tell me what <b>tailor</b> means.           | <b>Tailor</b> means a person who makes or fixes clothes.         |   | <b>Tailor</b> is like sew-er.    |   |               |
| <b>Response</b>                                  |                                                                  |   |                                  |   |               |
| P 6. Tell me what <b>worn</b> means.             | <b>Worn</b> means to become thin or torn from use.               |   | <b>Worn</b> is like damaged.     |   |               |
| <b>Response</b>                                  |                                                                  |   |                                  |   |               |
| <b>Notes on extra exposure:</b>                  |                                                                  |   |                                  |   |               |

**CONTINUE TO NEXT PAGE FOR BOOK READING**

**Book Reading (Text):**

**SAY:** “Let’s read our storybook and listen for those words!”

| <b><u>SHOW</u><br/>Book<br/>Picture</b> | <b><u>READ</u> Text</b>                                                                                                                          | √ | <b>X<br/>exposure</b> |
|-----------------------------------------|--------------------------------------------------------------------------------------------------------------------------------------------------|---|-----------------------|
| <b>Page 1</b>                           | “I never sleep on wrinkled sheets, so change them now and make them <b>smooth</b> .”                                                             |   |                       |
| <b>Page 4</b>                           | “He says to you, ‘This toothpaste you use is much too sweet, and your toothbrush, I’m sorry to say, is all <b>worn</b> .’”                       |   |                       |
| <b>Page 10</b>                          | “The knees are snug, and the button is gone, and the cuffs are <b>frayed</b> .”                                                                  |   |                       |
| <b>Page 10</b>                          | “For goodness sake, the seam is ripped—so send these right off to the <b>tailor</b> .”                                                           |   |                       |
| <b>Page 13</b>                          | “He says to you, ‘This cereal is <b>stale</b> .’”                                                                                                |   |                       |
| <b>Page 21</b>                          | “What do you do if you want to go riding but there on your red-painted tricycle seat sits a grown Bengal Tiger with <b>flashing</b> green eyes?” |   |                       |
| <b>Notes on extra exposure:</b>         |                                                                                                                                                  |   |                       |

**CONTINUE TO NEXT PAGE FOR REVIEW**

**Review (Context):**

**SAY** “Let’s think about the different words from our storybook.”

| <b><u>SHOW</u> Context<br/>Picture and <u>SAY</u></b>      | <b><u>SAY</u> Context</b>                                                                | √ | <b>X</b><br>exposure |
|------------------------------------------------------------|------------------------------------------------------------------------------------------|---|----------------------|
| <b>R 1.</b> How does the blanket look?                     | <b>[Click]</b> The blanket I slept with every night was <b>worn</b> .                    |   |                      |
| <b>Response (transcribe and highlight if questionable)</b> |                                                                                          |   |                      |
| <b>R 2.</b> Who is she?                                    | <b>[Click]</b> The <b>tailor</b> fixed my dress that had a big hole.                     |   |                      |
| <b>Response (transcribe and highlight if questionable)</b> |                                                                                          |   |                      |
| <b>R 3.</b> How do the chips taste?                        | <b>[Click]</b> The chips were <b>stale</b> because the bag was left open for three days. |   |                      |
| <b>Response (transcribe and highlight if questionable)</b> |                                                                                          |   |                      |
| <b>R 4.</b> How does his skin feel?                        | <b>[Click]</b> My dad's face was <b>smooth</b> because he shaved off his beard.          |   |                      |
| <b>Response (transcribe and highlight if questionable)</b> |                                                                                          |   |                      |
| <b>R 5.</b> How does the rope look?                        | <b>[Click]</b> The rope was <b>frayed</b> because many kids climbed it every day.        |   |                      |
| <b>Response (transcribe and highlight if questionable)</b> |                                                                                          |   |                      |
| <b>R 6.</b> What is the lightning doing?                   | <b>[Click]</b> The <b>flashing</b> lightning lights up the summer night sky.             |   |                      |
| <b>Response (transcribe and highlight if questionable)</b> |                                                                                          |   |                      |
| <b>Notes on extra exposure:</b>                            |                                                                                          |   |                      |

Participant Number: \_\_\_\_\_ Examiner: \_\_\_\_\_ Date: \_\_\_\_\_  
 Treatment Session Number: \_\_\_\_\_ Dose = 4; Dose Frequency = 9  
 Dose Frequency for this Training (circle 1): 1 2 3 4 5 6 7 8 9

Videotape Number: \_\_\_\_\_ Start time: \_\_\_\_\_ End time: \_\_\_\_\_ Session Length: \_\_\_\_\_

**Preview (Definition + Synonym):**

**SAY:** "Let's look at some of the words we'll hear in our storybook."

| <b><u>SHOW</u></b><br><b>Definition</b><br><b>Picture and SAY</b> | <b><u>SAY</u> Definition</b>                                | √ | <b><u>SAY</u> Synonym</b>            | √ | <b>X</b><br><b>exp.</b> |
|-------------------------------------------------------------------|-------------------------------------------------------------|---|--------------------------------------|---|-------------------------|
| <b>P 1.</b> Tell me what <b>awful</b> means.                      | <b>Awful</b> means something that is very terrible.         |   | <b>Awful</b> is like bad.            |   |                         |
| <b>Response</b>                                                   |                                                             |   |                                      |   |                         |
| <b>P 2.</b> Tell me what <b>crept</b> means.                      | <b>Crept</b> means to have moved slowly and quietly.        |   | <b>Crept</b> is like sneaked.        |   |                         |
| <b>Response</b>                                                   |                                                             |   |                                      |   |                         |
| <b>P 3.</b> Tell me what <b>decided</b> means.                    | <b>Decided</b> means to make up one's mind.                 |   | <b>Decided</b> is like chose.        |   |                         |
| <b>Response</b>                                                   |                                                             |   |                                      |   |                         |
| <b>P 4.</b> Tell me what <b>haddock</b> means.                    | <b>Haddock</b> means a fish that can be eaten as food.      |   | <b>Haddock</b> is like fish.         |   |                         |
| <b>Response</b>                                                   |                                                             |   |                                      |   |                         |
| <b>P 5.</b> Tell me what <b>noticed</b> means.                    | <b>Noticed</b> means to look or pay attention to something. |   | <b>Noticed</b> is like recognized.   |   |                         |
| <b>Response</b>                                                   |                                                             |   |                                      |   |                         |
| <b>P 6.</b> Tell me what <b>tight</b> means.                      | <b>Tight</b> means to hold closely in place.                |   | <b>Tight</b> is like close together. |   |                         |
| <b>Response</b>                                                   |                                                             |   |                                      |   |                         |
| <b>Notes on extra exposure:</b>                                   |                                                             |   |                                      |   |                         |

**CONTINUE TO NEXT PAGE FOR BOOK READING**

**Book Reading (Text):**

**SAY:** “Let’s read our storybook and listen for those words!”

| <u>SHOW</u><br>Book<br>Picture  | <u>READ</u> Text                                                                     | √ | X<br>exposure |
|---------------------------------|--------------------------------------------------------------------------------------|---|---------------|
| <b>Page 7</b>                   | “William <b>crept</b> down the hall...”                                              |   |               |
| <b>Page 9</b>                   | “William had kept his eyes shut <b>tight</b> ”                                       |   |               |
| <b>Page 16</b>                  | “He fed it hazelnuts, <b>haddock</b> , and honey.”                                   |   |               |
| <b>Page 18</b>                  | “The smell got stronger and stronger until William’s mom <b>noticed</b> it.”         |   |               |
| <b>Page 18</b>                  | “She said, ‘What’s that <b>awful</b> smell!’”                                        |   |               |
| <b>Page 21</b>                  | “Then William and Mom <b>decided</b> to scare the bear that lived under the stairs.” |   |               |
| <b>Notes on extra exposure:</b> |                                                                                      |   |               |

**CONTINUE TO NEXT PAGE FOR REVIEW**

**Review (Context):**

**SAY** “Let’s think about the different words from our storybook.”

| <b><u>SHOW</u> Context<br/>Picture and <u>SAY</u></b>      | <b><u>SAY</u> Context</b>                                                                  | √ | <b>X</b><br><br><b>exposure</b> |
|------------------------------------------------------------|--------------------------------------------------------------------------------------------|---|---------------------------------|
| <b>R 1.</b> How is she holding the ball?                   | <b>[Click]</b> She held her ball <b><i>tight</i></b> so she wouldn’t lose it at the beach. |   |                                 |
| <b>Response (transcribe and highlight if questionable)</b> |                                                                                            |   |                                 |
| <b>R 2.</b> What did her friends do?                       | <b>[Click]</b> Her friends <b><i>noticed</i></b> that she was wearing new glasses.         |   |                                 |
| <b>Response (transcribe and highlight if questionable)</b> |                                                                                            |   |                                 |
| <b>R 3.</b> What’s this?<br>[Point to fish]                | <b>[Click]</b> Yesterday, I went fishing with my dad and caught a <b><i>haddock</i></b> .  |   |                                 |
| <b>Response (transcribe and highlight if questionable)</b> |                                                                                            |   |                                 |
| <b>R 4.</b> What did he do?                                | <b>[Click]</b> The boy <b><i>decided</i></b> to play with the yellow cup.                  |   |                                 |
| <b>Response (transcribe and highlight if questionable)</b> |                                                                                            |   |                                 |
| <b>R 5.</b> What did the girl do?                          | <b>[Click]</b> My sister <b><i>crept</i></b> up behind my dad and made him laugh.          |   |                                 |
| <b>Response (transcribe and highlight if questionable)</b> |                                                                                            |   |                                 |
| <b>R 6.</b> How does the girl feel?                        | <b>[Click]</b> I felt <b><i>awful</i></b> so my mom gave me a hug.                         |   |                                 |
| <b>Response (transcribe and highlight if questionable)</b> |                                                                                            |   |                                 |
| <b>Notes on extra exposure:</b>                            |                                                                                            |   |                                 |

Participant Number \_\_\_\_\_ Examiner: \_\_\_\_\_ Date: \_\_\_\_\_

Treatment Session Number: \_\_\_\_\_ Dose = 4; Dose Frequency = 9  
 Dose Frequency for this Training (circle 1): 1 2 3 4 5 6 7 8 9

|                         |                   |                 |                       |
|-------------------------|-------------------|-----------------|-----------------------|
| Videotape Number: _____ | Start time: _____ | End time: _____ | Session Length: _____ |
|-------------------------|-------------------|-----------------|-----------------------|

**Preview (Definition + Synonym):**

**SAY:** "Let's look at some of the words we'll hear in our storybook."

| <b><u>SHOW</u><br/>Definition<br/>Picture and<br/>SAY</b> | <b><u>SAY</u> Definition</b>                                                |   | <b><u>SAY</u> Synonym</b>                  |   | <b>X<br/>exposure</b> |
|-----------------------------------------------------------|-----------------------------------------------------------------------------|---|--------------------------------------------|---|-----------------------|
| <b>P 1.</b> Tell me what <b><i>gathered</i></b> means.    | <b><i>Gathered</i></b> means to have brought together in one place.         | √ | <b><i>Gathered</i></b> is like collected.  | √ |                       |
| <b>Response</b>                                           |                                                                             |   |                                            |   |                       |
| <b>P 2.</b> Tell me what <b><i>heaved</i></b> means.      | <b><i>Heaved</i></b> means to do something with great effort.               |   | <b><i>Heaved</i></b> is like lifted.       |   |                       |
| <b>Response</b>                                           |                                                                             |   |                                            |   |                       |
| <b>P 3.</b> Tell me what <b><i>pouted</i></b> means.      | <b><i>Pouted</i></b> means to look upset by pushing out the lips.           |   | <b><i>Pouted</i></b> is like frowned.      |   |                       |
| <b>Response</b>                                           |                                                                             |   |                                            |   |                       |
| <b>P 4.</b> Tell me what <b><i>ruffle</i></b> means.      | <b><i>Ruffle</i></b> means to move something that is even to make it messy. |   | <b><i>Ruffle</i></b> is like disturb.      |   |                       |
| <b>Response</b>                                           |                                                                             |   |                                            |   |                       |
| <b>P 5.</b> Tell me what <b><i>squawked</i></b> means.    | <b><i>Squawked</i></b> means to say loudly you don't like something.        |   | <b><i>Squawked</i></b> is like complained. |   |                       |
| <b>Response</b>                                           |                                                                             |   |                                            |   |                       |
| <b>P 6.</b> Tell me what <b><i>whinnied</i></b> means.    | <b><i>Whinnied</i></b> means to make a gentle sound, usually by a horse.    |   | <b><i>Whinnied</i></b> is like neigh.      |   |                       |
| <b>Response</b>                                           |                                                                             |   |                                            |   |                       |
| <b>Notes on extra exposure:</b>                           |                                                                             |   |                                            |   |                       |

**CONTINUE TO NEXT PAGE FOR BOOK READING**



**Book Reading (Text):**

**SAY:** “Let’s read our storybook and listen for those words!”

| <b><u>SHOW</u><br/>Book<br/>Picture</b> | <b><u>READ</u> Text</b>                                                                                                                                        | √ | <b>X<br/>exposure</b> |
|-----------------------------------------|----------------------------------------------------------------------------------------------------------------------------------------------------------------|---|-----------------------|
| <b>Page 4</b>                           | “...no one to scratch behind their ears or <b>ruffle</b> their feathers.”                                                                                      |   |                       |
| <b>Page 6</b>                           | The pig <b>pouted</b> .                                                                                                                                        |   |                       |
| <b>Page 6</b>                           | “...the hen <b>heaved</b> a sigh...”                                                                                                                           |   |                       |
| <b>Page 7</b>                           | “Long about noon, with the sun high above the barnyard, the hen stood up. ‘I’m bored! And I’m heading to town to find something to do!’ she <b>squawked</b> .” |   |                       |
| <b>Page 9</b>                           | “Neigh! Neigh!” <b>whinnied</b> the horse.”                                                                                                                    |   |                       |
| <b>Page 24</b>                          | “Back at the farm, the horse, the cow, the goat, the pig, the duck, and the hen <b>gathered</b> around the books.”                                             |   |                       |

**Notes on extra exposure:**

**CONTINUE TO NEXT PAGE FOR REVIEW**

**Review (Context):**

**SAY** “Let’s think about the different words from our storybook.”

| <p><b><u>SHOW</u></b><br/> <b>Context</b><br/> <b>Picture and</b><br/> <b>SAY</b></p> | <p><b><u>SAY</u> Context</b></p>                                                              | <p>√</p> | <p><b>X</b><br/> <b>exposure</b></p> |
|---------------------------------------------------------------------------------------|-----------------------------------------------------------------------------------------------|----------|--------------------------------------|
| <p><b>R 1.</b> What did the horse do?</p>                                             | <p><b>[Click]</b> The big white horse <i>whinnied</i> when I pet his head.</p>                |          |                                      |
| <p><b>Response (transcribe and highlight if questionable)</b></p>                     |                                                                                               |          |                                      |
| <p><b>R 2.</b> What did the mom do?</p>                                               | <p><b>[Click]</b> Mom <i>squawked</i> for a long time when she saw the mess we made.</p>      |          |                                      |
| <p><b>Response (transcribe and highlight if questionable)</b></p>                     |                                                                                               |          |                                      |
| <p><b>R 3.</b> What does he do to the boy’s hair?</p>                                 | <p><b>[Click]</b> Dad likes to <i>ruffle</i> my hair and make me laugh.</p>                   |          |                                      |
| <p><b>Response (transcribe and highlight if questionable)</b></p>                     |                                                                                               |          |                                      |
| <p><b>R 4.</b> What did the girl do?</p>                                              | <p><b>[Click]</b> The girl <i>pouted</i> because she didn’t want to share her basketball.</p> |          |                                      |
| <p><b>Response (transcribe and highlight if questionable)</b></p>                     |                                                                                               |          |                                      |
| <p><b>R 5.</b> What did she do with her backpack?</p>                                 | <p><b>[Click]</b> The young girl <i>heaved</i> her heavy backpack over her shoulder.</p>      |          |                                      |
| <p><b>Response (transcribe and highlight if questionable)</b></p>                     |                                                                                               |          |                                      |
| <p><b>R 6.</b> What did he do with his toys?</p>                                      | <p><b>[Click]</b> He <i>gathered</i> all of his toys and put them in a basket.</p>            |          |                                      |
| <p><b>Response (transcribe and highlight if questionable)</b></p>                     |                                                                                               |          |                                      |
| <p><b>Notes on extra exposure:</b></p>                                                |                                                                                               |          |                                      |

Participant Number: \_\_\_\_\_ Examiner: \_\_\_\_\_ Date: \_\_\_\_\_  
 Treatment Session Number: \_\_\_\_\_ Dose = 4; Dose Frequency = 9  
 Dose Frequency for this Training (circle 1): 1 2 3 4 5 6 7 8 9

Videotape Number: \_\_\_\_\_ Start time: \_\_\_\_\_ End time: \_\_\_\_\_ Session Length: \_\_\_\_\_

**Preview (Definition + Synonym):**

**SAY:** "Let's look at some of the words we'll hear in our storybook."

| <b><u>SHOW Definition</u><br/><u>Picture and SAY</u></b> | <b><u>SAY Definition</u></b>                                             | √ | <b><u>SAY Synonym</u></b>        | √ | <b>X<br/>exposure</b> |
|----------------------------------------------------------|--------------------------------------------------------------------------|---|----------------------------------|---|-----------------------|
| <b>P 1.</b> Tell me what <b>gulp</b> means.              | <b>Gulp</b> means to quickly eat or drink big bites or sips              |   | <b>Gulp</b> is like swallow.     |   |                       |
| <b>Response</b>                                          |                                                                          |   |                                  |   |                       |
| <b>P 2.</b> Tell me what <b>invisible</b> means.         | <b>Invisible</b> means not able to be seen.                              |   | <b>Invisible</b> is like hidden. |   |                       |
| <b>Response</b>                                          |                                                                          |   |                                  |   |                       |
| <b>P 3.</b> Tell me what <b>marvel</b> means.            | <b>Marvel</b> means a person or thing that causes surprise or curiosity. |   | <b>Marvel</b> is like wonder.    |   |                       |
| <b>Response</b>                                          |                                                                          |   |                                  |   |                       |
| <b>P 4.</b> Tell me what <b>midday</b> means.            | <b>Midday</b> means the middle part of the day.                          |   | <b>Midday</b> is like afternoon. |   |                       |
| <b>Response</b>                                          |                                                                          |   |                                  |   |                       |
| <b>P 5.</b> Tell me what <b>swaying</b> means.           | <b>Swaying</b> means swinging back and forth or side to side.            |   | <b>Swaying</b> is like rocking.  |   |                       |
| <b>Response</b>                                          |                                                                          |   |                                  |   |                       |
| <b>P 6.</b> Tell me what <b>swift</b> means.             | <b>Swift</b> means moving quickly, with great speed.                     |   | <b>Swift</b> is like fast.       |   |                       |
| <b>Response</b>                                          |                                                                          |   |                                  |   |                       |
| <b>Notes on extra exposure:</b>                          |                                                                          |   |                                  |   |                       |

**CONTINUE TO NEXT PAGE FOR BOOK READING**

**Book Reading (Text):****SAY:** “Let’s read our storybook and listen for those words!”

| <b><u>SHOW</u><br/>Book<br/>Picture</b> | <b><u>READ</u> Text</b>                                                                                            | √ | <b>X</b><br>exposure |
|-----------------------------------------|--------------------------------------------------------------------------------------------------------------------|---|----------------------|
| <b>Page 3</b>                           | “One bad day, they met a tuna fish, <b><i>swift</i></b> , fierce and very hungry.”                                 |   |                      |
| <b>Page 3</b>                           | “He swallowed all the little red fish in one <b><i>gulp</i></b> .”                                                 |   |                      |
| <b>Page 6</b>                           | “But the sea was full of wonderful creatures, and as he swam to each <b><i>marvel</i></b> Swimmy was happy again.” |   |                      |
| <b>Page 10</b>                          | “...Strange fish pulled by an <b><i>invisible</i></b> thread...”                                                   |   |                      |
| <b>Page 16</b>                          | “...and sea anemones, who looked like pink palm trees <b><i>swaying</i></b> in the wind.”                          |   |                      |
| <b>Page 26</b>                          | “And so they swam in the cool morning water and the <b><i>midday</i></b> sun and chased the big fish away.”        |   |                      |

**CONTINUE TO NEXT PAGE FOR REVIEW**

**Review (Context):**

**SAY** “Let’s think about the different words from our storybook.”

| <b><u>SHOW</u> Context<br/>Picture and <u>SAY</u></b>      | <b><u>SAY</u> Context</b>                                                                                   | √ | <b>X</b><br><b>exposure</b> |
|------------------------------------------------------------|-------------------------------------------------------------------------------------------------------------|---|-----------------------------|
| <b>R 1.</b> How is the boy running?                        | <b>[Click]</b> The boy was <b><i>swift</i></b> during the race and finished in first place.                 |   |                             |
| <b>Response (transcribe and highlight if questionable)</b> |                                                                                                             |   |                             |
| <b>R 2.</b> What is the flag doing?                        | <b>[Click]</b> The flag was <b><i>swaying</i></b> in the wind on Tuesday night.                             |   |                             |
| <b>Response (transcribe and highlight if questionable)</b> |                                                                                                             |   |                             |
| <b>R 3.</b> When is it?                                    | <b>[Click]</b> At school, we eat lunch with the other kids at <b><i>midday</i></b> .                        |   |                             |
| <b>Response (transcribe and highlight if questionable)</b> |                                                                                                             |   |                             |
| <b>R 4.</b> What is the candy store?                       | <b>[Click]</b> The candy store was a <b><i>marvel</i></b> with so many different flavors!                   |   |                             |
| <b>Response (transcribe and highlight if questionable)</b> |                                                                                                             |   |                             |
| <b>R 5.</b> How does the window look?                      | <b>[Click]</b> The bird flew into the window because it was <b><i>invisible</i></b> and he couldn’t see it. |   |                             |
| <b>Response (transcribe and highlight if questionable)</b> |                                                                                                             |   |                             |
| <b>R 6.</b> What does she do with her snack?               | <b>[Click]</b> She was so hungry that she finished her snack in one big <b><i>gulp</i></b> .                |   |                             |
| <b>Response (transcribe and highlight if questionable)</b> |                                                                                                             |   |                             |
| <b>Notes on extra exposure:</b>                            |                                                                                                             |   |                             |



**TREATMENT INTENSITY CONDITION**  
**36 6 dose X 6 dose frequency**  
**Set A = Treated Words**

**KU Word and Sound Learning Lab**

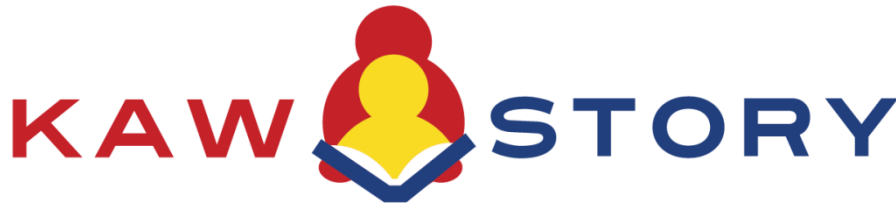

Kindergarten Children Acquiring Words through STORYbook Reading

**TREATMENT CHECKLIST**

**SUBJECT INFORMATION**

KAW Number: \_\_\_\_\_

Initials: \_\_\_\_\_

Preliminary Evaluation Dates: \_\_\_\_\_ Examiner(s): \_\_\_\_\_

Pre-treatment Testing Dates: \_\_\_\_\_ Examiner(s) (blind): \_\_\_\_\_

**INTENSITY CONDITION:**

**36 6-6 (each book 6 times)**      9-4 (each book 4 times)      4-9 (each book 9 times)

**VERSION CONDITION:** \_\_\_\_\_ **VERSION A**      VERSION B

| Treatment                              | Control                                 |
|----------------------------------------|-----------------------------------------|
| Book 1: Imogene's Antlers              | Book 1: Caterpillar that Roared         |
| Book 2: Otis                           | Book 2: What do you do with a Kangaroo? |
| Book 3: Shy Charles                    | Book 3: Bear Under the Stairs           |
| Book 4: Harry and the Terrible Whatzit | Book 4: Book! Book! Book!               |
| Book 5: Possum and the Peeper          | Book 5: Swimmy                          |

**TREATMENT PROVIDER (LIST ALL IF MORE THAN ONE):** \_\_\_\_\_

**SESSION SCHEDULE (2-3 SESSIONS PER WEEK)**

**INTENSITY 36: DOSE 6 (2 SESSIONS PER WEEK = 7 ½ WEEKS OR 3 SESSIONS PER WEEK = 5 WEEKS)**

| Session 1.1:                                                           | Session 1.2:                                                              |
|------------------------------------------------------------------------|---------------------------------------------------------------------------|
| Book 1 (1st): Imogene's Antlers<br>Book 2 (1st): Otis                  | Book 3 (1st): Shy Charles<br>Book 4 (1st): Harry and the Terrible Whatzit |
| Session 1.3:                                                           | Session 1.4:                                                              |
| Book 5 (1st): Possum and the Peeper<br>Book 1 (2nd): Imogene's Antlers | Book 2 (2nd): Otis<br>Book 4 (2nd): Harry and the Terrible Whatzit        |

|                                                                        |                                                                                 |
|------------------------------------------------------------------------|---------------------------------------------------------------------------------|
| <b>Session 1.5:</b>                                                    | <b>Session 1.6:</b>                                                             |
| Book 3 (2nd): Shy Charles<br>Book 5 (2nd): Possum and the Peeper       | Book 1 (3rd): Imogene's Antlers<br>Book 4 (3rd): Harry and the Terrible Whatzit |
| <b>Session 1.7:</b>                                                    | <b>Session 1.8:</b>                                                             |
| Book 2 (3rd): Otis<br>Book 5 (3rd): Possum and the Peeper              | Book 3 (3rd): Shy Charles<br>Book 1 (4th): Imogene's Antlers                    |
| <b>Session 1.9:</b>                                                    | <b>Session 1.10:</b>                                                            |
| Book 4 (4th): Harry and the Terrible Whatzit<br>Book 2 (4th): Otis     | Book 5 (4th): Possum and the Peeper<br>Book 3 (4th): Shy Charles                |
| <b>Session 1.11:</b>                                                   | <b>Session 1.12:</b>                                                            |
| Book 2 (5th): Otis<br>Book 1 (5th): Imogene's Antlers                  | Book 4 (5th): Harry and the Terrible Whatzit Book<br>3 (5th): Shy Charles       |
| <b>Session 1.13:</b>                                                   | <b>Session 1.14:</b>                                                            |
| Book 1 (6th): Imogene's Antlers<br>Book 5 (5th): Possum and the Peeper | Book 4 (6th): Harry and the Terrible Whatzit<br>Book 2 (6th): Otis              |
| <b>Session 1.15:</b>                                                   |                                                                                 |
| Book 5 (6th): Possum and the Peeper<br>Book 3 (6th): Shy Charles       |                                                                                 |

Post-treatment Testing Dates: \_\_\_\_\_ Examiner (blind): \_\_\_\_\_



**IMOGENE'S ANTLERS – 6-6 (VERSION A)**

Participant Number: \_\_\_\_\_ Examiner: \_\_\_\_\_ Date: \_\_\_\_\_

Treatment Session Number: \_\_\_\_\_

Dose = 6; Dose Frequency = 6      Dose Frequency for this Training (circle 1): 1 2 3 4 5 6

Videotape Number: \_\_\_\_\_ Start time: \_\_\_\_\_ End time: \_\_\_\_\_ Session Length: \_\_\_\_\_

**Preview (Definition + Synonym):**

**SAY:** "Let's look at some of the words we'll hear in our storybook."

| <b><u>SHOW</u> Definition<br/>Picture and SAY</b>       | <b><u>SAY</u> Definition</b>                                            | √ | <b><u>SAY</u> Synonym</b>                     | √ | <b>X<br/>exposure</b> |
|---------------------------------------------------------|-------------------------------------------------------------------------|---|-----------------------------------------------|---|-----------------------|
| <b>P 1.</b> Tell me what <b><i>advice</i></b> means.    | <b><i>Advice</i></b> means an idea used to help people to make choices. |   | <b><i>Advice</i></b> is like help.            |   |                       |
| <b>Response</b>                                         |                                                                         |   |                                               |   |                       |
| <b>P 2.</b> Tell me what <b><i>glared</i></b> means.    | <b><i>Glared</i></b> means to look at someone in an angry way.          |   | <b><i>Glared</i></b> is like stared.          |   |                       |
| <b>Response</b>                                         |                                                                         |   |                                               |   |                       |
| <b>P 3.</b> Tell me what <b><i>overjoyed</i></b> means. | <b><i>Overjoyed</i></b> means filled with joy; very happy.              |   | <b><i>Overjoyed</i></b> is like excited.      |   |                       |
| <b>Response</b>                                         |                                                                         |   |                                               |   |                       |
| <b>P 4.</b> Tell me what <b><i>prodded</i></b> means.   | <b><i>Prodded</i></b> means to poke someone with something pointed.     |   | <b><i>Prodded</i></b> is like pushed.         |   |                       |
| <b>Response</b>                                         |                                                                         |   |                                               |   |                       |
| <b>P 5.</b> Tell me what <b><i>rare</i></b> means.      | <b><i>Rare</i></b> means it is not often found or seen.                 |   | <b><i>Rare</i></b> is like not usual.         |   |                       |
| <b>Response</b>                                         |                                                                         |   |                                               |   |                       |
| <b>P 6.</b> Tell me what <b><i>wandered</i></b> means.  | <b><i>Wandered</i></b> means to move about from place to place.         |   | <b><i>Wandered</i></b> is like walked slowly. |   |                       |
| <b>Response</b>                                         |                                                                         |   |                                               |   |                       |
| <b>Notes on extra exposure</b>                          |                                                                         |   |                                               |   |                       |

**CONTINUE TO NEXT PAGE FOR BOOK READING**

**IMOGENE'S ANTLERS – 6-6 (VERSION A)**

**Book Reading (Text + Synonym):**

**SAY:** "Let's read our storybook and listen for those words!"

| <b><u>SHOW</u><br/>Book<br/>Picture</b> | <b><u>READ</u> Text</b>                                                                                                                 | √ | <b><u>SAY</u> Synonym</b>              | √ | <b>X<br/>exposure</b> |
|-----------------------------------------|-----------------------------------------------------------------------------------------------------------------------------------------|---|----------------------------------------|---|-----------------------|
| <b>Page 8</b>                           | "The doctor poked, and <b>prodded</b> ."                                                                                                |   | <b>Prodded</b> is like pushed.         |   |                       |
| <b>Page 9</b>                           | "The school principal <b>glared</b> at Imogene . . ."                                                                                   |   | <b>Glared</b> is like stared.          |   |                       |
| <b>Page 9</b>                           | "But the principal had no <b>advice</b> to offer."                                                                                      |   | <b>Advice</b> is like help.            |   |                       |
| <b>Page 10</b>                          | "Her brother, Norman, consulted the encyclopedia, and then announced that Imogene had turned into a <b>rare</b> form of miniature elk!" |   | <b>Rare</b> is like not usual.         |   |                       |
| <b>Page 16</b>                          | "Later, Imogene <b>wandered</b> upstairs."                                                                                              |   | <b>Wandered</b> is like walked slowly. |   |                       |
| <b>Page 25</b>                          | "When she came down to breakfast, the family was <b>overjoyed</b> to see her back to normal..."                                         |   | <b>Overjoyed</b> is like excited.      |   |                       |
| <b>Notes on extra exposure:</b>         |                                                                                                                                         |   |                                        |   |                       |

**CONTINUE TO NEXT PAGE FOR REVIEW**

## IMOGENE'S ANTLERS – 6-6 (VERSION A)

### Review (Context + Definition):

**SAY** “Let’s think about the different words from our storybook.”

| <b><u>SHOW</u> Context<br/>Picture and <u>SAY</u></b>      | <b><u>SAY</u> Context</b>                                                                        | √ | <b><u>SAY</u> Definition</b>                                     | √ | <b>X<br/>exposure</b> |
|------------------------------------------------------------|--------------------------------------------------------------------------------------------------|---|------------------------------------------------------------------|---|-----------------------|
| <b>R 1.</b> What did they do?                              | <b>[Click]</b> While waiting for soccer practice to start, we <b>wandered</b> around the school. |   | <b>Wandered</b> means to move about from place to place.         |   |                       |
| <b>Response (transcribe and highlight if questionable)</b> |                                                                                                  |   |                                                                  |   |                       |
| <b>R 2.</b> What kind of elephant is this?                 | <b>[Click]</b> It is <b>rare</b> to see an elephant in a big city.                               |   | <b>Rare</b> means not often found or seen.                       |   |                       |
| <b>Response (transcribe and highlight if questionable)</b> |                                                                                                  |   |                                                                  |   |                       |
| <b>R 3.</b> What did he do with his stick?                 | <b>[Click]</b> The farmer <b>prodded</b> the cow to move it into the fence.                      |   | <b>Prodded</b> means to poke someone with something pointed.     |   |                       |
| <b>Response (transcribe and highlight if questionable)</b> |                                                                                                  |   |                                                                  |   |                       |
| <b>R 4.</b> How does he feel?                              | <b>[Click]</b> He was <b>overjoyed</b> to get a puppy for his birthday.                          |   | <b>Overjoyed</b> means filled with joy; very happy.              |   |                       |
| <b>Response (transcribe and highlight if questionable)</b> |                                                                                                  |   |                                                                  |   |                       |
| <b>R 5.</b> What did she do?                               | <b>[Click]</b> I <b>glared</b> at my sister after she took my toy from me.                       |   | <b>Glared</b> means to look at someone in an angry way.          |   |                       |
| <b>Response (transcribe and highlight if questionable)</b> |                                                                                                  |   |                                                                  |   |                       |
| <b>R 6.</b> What is he telling the boy?                    | <b>[Click]</b> Dad gave me <b>advice</b> on how to make more friends at school.                  |   | <b>Advice</b> means an idea used to help people to make choices. |   |                       |
| <b>Response (transcribe and highlight if questionable)</b> |                                                                                                  |   |                                                                  |   |                       |
| <b>Notes on extra exposure:</b>                            |                                                                                                  |   |                                                                  |   |                       |

## OTIS – 6-6 (VERSION A)

Participant Number: \_\_\_\_\_ Examiner: \_\_\_\_\_ Date: \_\_\_\_\_

Treatment Session Number: \_\_\_\_\_

Dose = 6; Dose Frequency = 6

Dose Frequency for this Training (circle 1): 1 2 3 4 5 6

Videotape Number: \_\_\_\_\_ Start time: \_\_\_\_\_ End time: \_\_\_\_\_ Session Length: \_\_\_\_\_

**Preview (Definition + Synonym):****SAY:** "Let's look at some of the words we'll hear in our storybook."

| <b><u>SHOW Definition</u></b><br><b><u>Picture and SAY</u></b> | <b><u>SAY Definition</u></b>                                                         | √ | <b><u>SAY Synonym</u></b>                        | √ | <b>X</b><br><b>exposure</b> |
|----------------------------------------------------------------|--------------------------------------------------------------------------------------|---|--------------------------------------------------|---|-----------------------------|
| <b>P 1.</b> Tell me what <b><i>hauled</i></b> means.           | <b><i>Hauled</i></b> means carried with force or effort.                             |   | <b><i>Hauled</i></b> is like dragged.            |   |                             |
| <b>Response</b>                                                |                                                                                      |   |                                                  |   |                             |
| <b>P 2.</b> Tell me what <b><i>hooves</i></b> means.           | <b><i>Hooves</i></b> means hard parts on the feet of animals like horses or pigs.    |   | <b><i>Hooves</i></b> are like feet.              |   |                             |
| <b>Response</b>                                                |                                                                                      |   |                                                  |   |                             |
| <b>P 3.</b> Tell me what <b><i>ripe</i></b> means.             | <b><i>Ripe</i></b> means full grown and good to pick or eat.                         |   | <b><i>Ripe</i></b> is like ready.                |   |                             |
| <b>Response</b>                                                |                                                                                      |   |                                                  |   |                             |
| <b>P 4.</b> Tell me what <b><i>sidelines</i></b> means.        | <b><i>Sidelines</i></b> means lines marking the sides of fields or courts in sports. |   | <b><i>Sidelines</i></b> are like boundary lines. |   |                             |
| <b>Response</b>                                                |                                                                                      |   |                                                  |   |                             |
| <b>P 5.</b> Tell me what <b><i>silky</i></b> means.            | <b><i>Silky</i></b> means soft, like a material used to make clothes.                |   | <b><i>Silky</i></b> is like shiny.               |   |                             |
| <b>Response</b>                                                |                                                                                      |   |                                                  |   |                             |
| <b>P 6.</b> Tell me what <b><i>spotless</i></b> means.         | <b><i>Spotless</i></b> means without any dirt or spots.                              |   | <b><i>Spotless</i></b> is like very clean.       |   |                             |
| <b>Response</b>                                                |                                                                                      |   |                                                  |   |                             |
| <b>Notes on extra exposure:</b>                                |                                                                                      |   |                                                  |   |                             |

**CONTINUE TO NEXT PAGE FOR BOOK READING**

**OTIS – 6-6 (VERSION A)**

**Book Reading (Text + Synonym):**

**SAY:** “Let’s read our storybook and listen for those words!”

| <b><u>SHOW</u><br/>Book<br/>Picture</b> | <b><u>READ</u> Text</b>                                                                         | √ | <b><u>SAY</u><br/>Synonym</b>                    | √ | <b>X<br/>exposure</b> |
|-----------------------------------------|-------------------------------------------------------------------------------------------------|---|--------------------------------------------------|---|-----------------------|
| <b>Page 1</b>                           | “He had soft, <b><i>silky</i></b> hairs.”                                                       |   | <b><i>Silky</i></b> is like shiny.               |   |                       |
| <b>Page 5</b>                           | “When his brothers played rugby in the swamp, Otis kept score on the <b><i>sidelines</i></b> .” |   | <b><i>Sidelines</i></b> are like boundary lines. |   |                       |
| <b>Page 9</b>                           | “Otis tried very hard to remain a <b><i>spotless</i></b> pig.”                                  |   | <b><i>Spotless</i></b> is like very clean.       |   |                       |
| <b>Page 13</b>                          | “Otis imagined mud oozing around his <b><i>hooves</i></b> .”                                    |   | <b><i>Hooves</i></b> are like feet.              |   |                       |
| <b>Page 16</b>                          | “While his brothers weeded the corn, Otis <b><i>hauled</i></b> the weeds away.”                 |   | <b><i>Hauled</i></b> is like dragged.            |   |                       |
| <b>Page 17</b>                          | “Otis’s sisters picked the <b><i>ripe</i></b> corn.”                                            |   | <b><i>Ripe</i></b> is like ready.                |   |                       |
| <b>Notes on extra exposure:</b>         |                                                                                                 |   |                                                  |   |                       |

**CONTINUE TO NEXT PAGE FOR REVIEW**

## OTIS – 6-6 (VERSION A)

**Review (Context + Definition):****SAY** "Let's think about the different words from our storybook."

| <b><u>SHOW</u> Context<br/>Picture and <u>SAY</u></b>      | <b><u>SAY</u> Context</b>                                                                    | √ | <b><u>SAY</u> Definition</b>                                                  | √ | <b>X<br/>exposure</b> |
|------------------------------------------------------------|----------------------------------------------------------------------------------------------|---|-------------------------------------------------------------------------------|---|-----------------------|
| <b>R 1.</b> How does the car look?                         | <b>[Click]</b> After washing the car with lots of soap, it looked <b>spotless</b> .          |   | <b>Spotless</b> means without any dirt or spots.                              |   |                       |
| <b>Response (transcribe and highlight if questionable)</b> |                                                                                              |   |                                                                               |   |                       |
| <b>R 2.</b> How is the dress?                              | <b>[Click]</b> Mom went to the store and bought a new <b>silky</b> dress.                    |   | <b>Silky</b> means soft like a material used to make clothes.                 |   |                       |
| <b>Response (transcribe and highlight if questionable)</b> |                                                                                              |   |                                                                               |   |                       |
| <b>R 3.</b> Where is he sitting?                           | <b>[Click]</b> My brother was hurt so he sat on the <b>sidelines</b> at the soccer game.     |   | <b>Sidelines</b> means lines marking the sides of fields or courts in sports. |   |                       |
| <b>Response (transcribe and highlight if questionable)</b> |                                                                                              |   |                                                                               |   |                       |
| <b>R 4.</b> How are the strawberries?                      | <b>[Click]</b> I like to eat <b>ripe</b> strawberries in the summertime.                     |   | <b>Ripe</b> means full grown and good to pick or eat.                         |   |                       |
| <b>Response (transcribe and highlight if questionable)</b> |                                                                                              |   |                                                                               |   |                       |
| <b>R 5.</b> What are these? [Point to hooves]              | <b>[Click]</b> The horses kicked each other with their <b>hooves</b> when they were playing. |   | <b>Hooves</b> means hard parts on the feet of animals like horses or pigs.    |   |                       |
| <b>Response (transcribe and highlight if questionable)</b> |                                                                                              |   |                                                                               |   |                       |
| <b>R 6.</b> What did the man do?                           | <b>[Click]</b> Dad <b>hauled</b> all of our heavy trash to the big trash can.                |   | <b>Hauled</b> means carried with force or effort.                             |   |                       |
| <b>Response (transcribe and highlight if questionable)</b> |                                                                                              |   |                                                                               |   |                       |
| <b>Notes on extra exposure:</b>                            |                                                                                              |   |                                                                               |   |                       |

Participant Number: \_\_\_\_\_ Examiner: \_\_\_\_\_ Date: \_\_\_\_\_  
 Treatment Session Number: \_\_\_\_\_  
 Dose = 6; Dose Frequency = 6 Dose Frequency for this Training (circle 1): 1 2 3 4 5 6

Videotape Number: \_\_\_\_\_ Start time: \_\_\_\_\_ End time: \_\_\_\_\_ Session Length: \_\_\_\_\_

**Preview (Definition + Synonym):**

**SAY:** "Let's look at some of the words we'll hear in our storybook."

| <b><u>SHOW</u> Definition<br/>Picture and <u>SAY</u></b>  | <b><u>SAY</u> Definition</b>                                                       | ✓ | <b><u>SAY</u> Synonym</b>                        | ✓ | <b>X<br/>exposure</b> |
|-----------------------------------------------------------|------------------------------------------------------------------------------------|---|--------------------------------------------------|---|-----------------------|
| <b>P 1.</b> Tell me what <b><i>embarrassed</i></b> means. | <b><i>Embarrassed</i></b> means to have felt foolish or upset.                     |   | <b><i>Embarrassed</i></b> is like uncomfortable. |   |                       |
| <b>Response</b>                                           |                                                                                    |   |                                                  |   |                       |
| <b>P 2.</b> Tell me what <b><i>murmured</i></b> means.    | <b><i>Murmured</i></b> means to have spoken in a soft, low sound.                  |   | <b><i>Murmured</i></b> is like mumbled.          |   |                       |
| <b>Response</b>                                           |                                                                                    |   |                                                  |   |                       |
| <b>P 3.</b> Tell me what <b><i>nervous</i></b> means.     | <b><i>Nervous</i></b> means feeling scared or showing tension.                     |   | <b><i>Nervous</i></b> is like worried.           |   |                       |
| <b>Response</b>                                           |                                                                                    |   |                                                  |   |                       |
| <b>P 4.</b> Tell me what <b><i>scarlet</i></b> means.     | <b><i>Scarlet</i></b> means a bright red color.                                    |   | <b><i>Scarlet</i></b> is like very red.          |   |                       |
| <b>Response</b>                                           |                                                                                    |   |                                                  |   |                       |
| <b>P 5.</b> Tell me what <b><i>success</i></b> means.     | <b><i>Success</i></b> means a person that does well or a thing that goes well.     |   | <b><i>Success</i></b> is like a win.             |   |                       |
| <b>Response</b>                                           |                                                                                    |   |                                                  |   |                       |
| <b>P 6.</b> Tell me what <b><i>trembled</i></b> means.    | <b><i>Trembled</i></b> means to have shivered from being scared, cold, or excited. |   | <b><i>Trembled</i></b> is like shook.            |   |                       |
| <b>Response</b>                                           |                                                                                    |   |                                                  |   |                       |
| <b>Notes on extra exposure:</b>                           |                                                                                    |   |                                                  |   |                       |

**CONTINUE TO NEXT PAGE FOR BOOK READING**

**Book Reading (Text + Synonym):****SAY:** “Let’s read our storybook and listen for those words!”

| <b><u>SHOW</u><br/>Book<br/>Picture</b> | <b><u>READ</u> Text</b>                                      | √ | <b><u>SAY</u> Synonym</b>                        | √ | <b>X<br/>exposure</b> |
|-----------------------------------------|--------------------------------------------------------------|---|--------------------------------------------------|---|-----------------------|
| <b>Page 8</b>                           | “I’m so <b><i>embarrassed</i></b> ,’ said Charles’s mother.” |   | <b><i>Embarrassed</i></b> is like uncomfortable. |   |                       |
| <b>Page 13</b>                          | “Charles was not a <b><i>success</i></b> .”                  |   | <b><i>Success</i></b> is like a win.             |   |                       |
| <b>Page 14</b>                          | “The shirt was <b><i>scarlet</i></b> with shoulder pads.”    |   | <b><i>Scarlet</i></b> is like very red.          |   |                       |
| <b>Page 16</b>                          | “Charles <b><i>trembled</i></b> like an autumn leaf.”        |   | <b><i>Trembled</i></b> is like shook.            |   |                       |
| <b>Page 19</b>                          | “Then Charles’s father <b><i>murmured</i></b> low”           |   | <b><i>Murmured</i></b> is like mumbled.          |   |                       |
| <b>Page 24</b>                          | “He told her, ‘Now, don’t be <b><i>nervous!</i></b> ’”       |   | <b><i>Nervous</i></b> is like worried.           |   |                       |
| <b>Notes on extra exposure:</b>         |                                                              |   |                                                  |   |                       |

**CONTINUE TO NEXT PAGE FOR REVIEW**



**Review (Context + Definition):****SAY** "Let's think about the different words from our storybook."

| <b><u>SHOW</u> Context<br/><u>Picture and SAY</u></b>      | <b><u>SAY</u> Context</b>                                                               | √ | <b><u>SAY</u> Definition</b>                                                | √ | <b>X<br/>exposure</b> |
|------------------------------------------------------------|-----------------------------------------------------------------------------------------|---|-----------------------------------------------------------------------------|---|-----------------------|
| <b>R 1.</b> What did the mailman do?                       | <b>[Click]</b> The mailman <b>trembled</b> because a mean dog barked at him.            |   | <b>Trembled</b> means to have shivered from being scared, cold, or excited. |   |                       |
| <b>Response (transcribe and highlight if questionable)</b> |                                                                                         |   |                                                                             |   |                       |
| <b>R 2.</b> What did they achieve?                         | <b>[Click]</b> The game was a <b>success</b> and the team was happy they won.           |   | <b>Success</b> means a person or thing that does or goes well.              |   |                       |
| <b>Response (transcribe and highlight if questionable)</b> |                                                                                         |   |                                                                             |   |                       |
| <b>R 3.</b> What color are her clothes?                    | <b>[Click]</b> Her favorite color was <b>scarlet</b> and she wore it every day.         |   | <b>Scarlet</b> means a bright red color.                                    |   |                       |
| <b>Response (transcribe and highlight if questionable)</b> |                                                                                         |   |                                                                             |   |                       |
| <b>R 5.</b> How does she feel?                             | <b>[Click]</b> The young girl was <b>nervous</b> about her first day at her new school. |   | <b>Nervous</b> means feeling scared or showing tension.                     |   |                       |
| <b>Response (transcribe and highlight if questionable)</b> |                                                                                         |   |                                                                             |   |                       |
| <b>R 6.</b> What did the girl do?                          | <b>[Click]</b> Sarah <b>murmured</b> the secret to her best friends at lunch time.      |   | <b>Murmured</b> means to have spoken in a soft, low sound.                  |   |                       |
| <b>Response (transcribe and highlight if questionable)</b> |                                                                                         |   |                                                                             |   |                       |
| <b>R 7.</b> How does he feel?                              | <b>[Click]</b> The boy was <b>embarrassed</b> because a girl gave him a gift at school. |   | <b>Embarrassed</b> means to have felt foolish or upset.                     |   |                       |
| <b>Response (transcribe and highlight if questionable)</b> |                                                                                         |   |                                                                             |   |                       |

Participant Number: \_\_\_\_\_ Examiner: \_\_\_\_\_ Date: \_\_\_\_\_

Treatment Session Number: \_\_\_\_\_

Dose = 6; Dose Frequency = 6 Dose Frequency for this Training (circle 1): 1 2 3 4 5 6

Videotape Number: \_\_\_\_\_ Start time: \_\_\_\_\_ End time: \_\_\_\_\_ Session Length: \_\_\_\_\_

**Preview (Definition + Synonym):****SAY:** "Let's look at some of the words we'll hear in our storybook."

| <b><u>SHOW</u> Definition<br/>Picture and <u>SAY</u></b> | <b><u>SAY</u> Definition</b>                                                  | ✓ | <b><u>SAY</u> Synonym</b>                  | ✓ | <b>X<br/>exposure</b> |
|----------------------------------------------------------|-------------------------------------------------------------------------------|---|--------------------------------------------|---|-----------------------|
| <b>P 1.</b> Tell me what <b><i>damp</i></b> means.       | <b><i>Damp</i></b> means barely wet or moist.                                 |   | <b><i>Damp</i></b> is like a little soggy. |   |                       |
| <b>Response</b>                                          |                                                                               |   |                                            |   |                       |
| <b>P 2.</b> Tell me what <b><i>discovered</i></b> means. | <b><i>Discovered</i></b> means to have seen something first.                  |   | <b><i>Discovered</i></b> is like found.    |   |                       |
| <b>Response</b>                                          |                                                                               |   |                                            |   |                       |
| <b>P 3.</b> Tell me what <b><i>furnace</i></b> means.    | <b><i>Furnace</i></b> means something used to make heat to warm buildings.    |   | A <b><i>furnace</i></b> is like a heater.  |   |                       |
| <b>Response</b>                                          |                                                                               |   |                                            |   |                       |
| <b>P 4.</b> Tell me what <b><i>gloomy</i></b> means.     | <b><i>Gloomy</i></b> means having very little light.                          |   | <b><i>Gloomy</i></b> is like dark.         |   |                       |
| <b>Response</b>                                          |                                                                               |   |                                            |   |                       |
| <b>P 5.</b> Tell me what <b><i>swat</i></b> means.       | <b><i>Swat</i></b> means to hit quickly using an open hand or something else. |   | <b><i>Swat</i></b> is like slap.           |   |                       |
| <b>Response</b>                                          |                                                                               |   |                                            |   |                       |
| <b>P 6.</b> Tell me what <b><i>swung</i></b> means.      | <b><i>Swung</i></b> means to have caused to move back and forth.              |   | <b><i>Swung</i></b> is like spun.          |   |                       |
| <b>Response</b>                                          |                                                                               |   |                                            |   |                       |
| <b>Notes on extra exposure:</b>                          |                                                                               |   |                                            |   |                       |

**CONTINUE TO NEXT PAGE FOR BOOK READING**

**Book Reading (Text + Synonym):****SAY:** “Let’s read our storybook and listen for those words!”

| <b><u>SHOW</u><br/>Book<br/>Picture</b> | <b><u>READ</u> Text</b>                                                                  | √ | <b><u>SAY</u> Synonym</b>           | √ | <b>X<br/>exposure</b> |
|-----------------------------------------|------------------------------------------------------------------------------------------|---|-------------------------------------|---|-----------------------|
| <b>Page 1</b>                           | “I just knew, because the cellar was dark and <b>damp</b> and it smelled.”               |   | <b>Damp</b> is like a little soggy. |   |                       |
| <b>Page 6</b>                           | “It was very black and <b>gloomy</b> .”                                                  |   | <b>Gloomy</b> is like dark.         |   |                       |
| <b>Page 8</b>                           | “It was hiding behind the <b>furnace</b> .”                                              |   | A <b>furnace</b> is like a heater.  |   |                       |
| <b>Page 11</b>                          | “...and I gave it a <b>swat</b> with the broom. WHAM!”                                   |   | <b>Swat</b> is like slap.           |   |                       |
| <b>Page 13</b>                          | “I <b>swung</b> the broom again. WHAM!”                                                  |   | <b>Swung</b> is like spun.          |   |                       |
| <b>Page 23</b>                          | “I was searching for more clues when I <b>discovered</b> the back cellar door was open.” |   | <b>Discovered</b> is like found.    |   |                       |
| <b>Notes on extra exposure:</b>         |                                                                                          |   |                                     |   |                       |

**CONTINUE TO NEXT PAGE FOR REVIEW**

**Review (Context + Definition):**

**SAY** "Let's think about the different words from our storybook."

| <b><u>SHOW</u> Context<br/>Picture and SAY</b>             | <b><u>SAY</u> Context</b>                                                          | √ | <b><u>SAY</u> Definition</b>                                           | √ | <b>X<br/>exposure</b> |
|------------------------------------------------------------|------------------------------------------------------------------------------------|---|------------------------------------------------------------------------|---|-----------------------|
| <b>R 1.</b> What has he done?                              | <b>[Click]</b> The baseball player <b>swung</b> the bat and hit the ball.          |   | <b>Swung</b> means to have caused to move back and forth.              |   |                       |
| <b>Response (transcribe and highlight if questionable)</b> |                                                                                    |   |                                                                        |   |                       |
| <b>R 2.</b> What does the woman do?                        | <b>[Click]</b> I wanted to <b>swat</b> the fly so that it would go away.           |   | <b>Swat</b> means to hit quickly using an open hand or something else. |   |                       |
| <b>Response (transcribe and highlight if questionable)</b> |                                                                                    |   |                                                                        |   |                       |
| <b>R 3.</b> How is the sky?                                | <b>[Click]</b> The gray and <b>gloomy</b> sky was filled with rain clouds.         |   | <b>Gloomy</b> means having very little light.                          |   |                       |
| <b>Response (transcribe and highlight if questionable)</b> |                                                                                    |   |                                                                        |   |                       |
| <b>R 4.</b> What's this?                                   | <b>[Click]</b> In the farm house, Mom saw an old <b>furnace</b> that was very hot. |   | <b>Furnace</b> means something used to make heat to warm buildings.    |   |                       |
| <b>Response (transcribe and highlight if questionable)</b> |                                                                                    |   |                                                                        |   |                       |
| <b>R 5.</b> What did he do?                                | <b>[Click]</b> The boy <b>discovered</b> a secret pile of candy in the kitchen.    |   | <b>Discovered</b> means to have seen something first.                  |   |                       |
| <b>Response (transcribe and highlight if questionable)</b> |                                                                                    |   |                                                                        |   |                       |
| <b>R 6.</b> How are their clothes?                         | <b>[Click]</b> After playing in the water, our clothes were <b>damp</b> .          |   | <b>Damp</b> means barely wet or moist.                                 |   |                       |
| <b>Response (transcribe and highlight if questionable)</b> |                                                                                    |   |                                                                        |   |                       |
| <b>Notes on extra exposure:</b>                            |                                                                                    |   |                                                                        |   |                       |

Participant Number: \_\_\_\_\_ Examiner: \_\_\_\_\_ Date: \_\_\_\_\_  
 Treatment Session Number: \_\_\_\_\_  
 Dose = 6; Dose Frequency = 6 Dose Frequency for this Training (circle 1): 1 2 3 4 5 6

Videotape Number: \_\_\_\_\_ Start time: \_\_\_\_\_ End time: \_\_\_\_\_ Session Length: \_\_\_\_\_

**Preview (Definition + Synonym):**

**SAY:** "Let's look at some of the words we'll hear in our storybook."

| <b><u>SHOW</u> Definition<br/>Picture and <u>SAY</u></b> | <b><u>SAY</u> Definition</b>                                                   | √ | <b><u>SAY</u> Synonym</b>                 | √ | <b>X<br/>exposure</b> |
|----------------------------------------------------------|--------------------------------------------------------------------------------|---|-------------------------------------------|---|-----------------------|
| <b>P 1.</b> Tell me what <b><i>clamor</i></b> means.     | <b><i>Clamor</i></b> means a loud sound that goes on for some time.            |   | <b><i>Clamor</i></b> is like noise.       |   |                       |
| <b>Response</b>                                          |                                                                                |   |                                           |   |                       |
| <b>P 2.</b> Tell me what <b><i>grumbling</i></b> means.  | <b><i>Grumbling</i></b> means complaining in a low voice.                      |   | <b><i>Grumbling</i></b> is like whining.  |   |                       |
| <b>Response</b>                                          |                                                                                |   |                                           |   |                       |
| <b>P 3.</b> Tell me what <b><i>marsh</i></b> means.      | <b><i>Marsh</i></b> means a low, wet land, often thick with tall grasses.      |   | <b><i>Marsh</i></b> is like a swamp.      |   |                       |
| <b>Response</b>                                          |                                                                                |   |                                           |   |                       |
| <b>P 4.</b> Tell me what <b><i>peering</i></b> means.    | <b><i>Peering</i></b> means looking hard or closely to see something better.   |   | <b><i>Peering</i></b> is like staring.    |   |                       |
| <b>Response</b>                                          |                                                                                |   |                                           |   |                       |
| <b>P 5.</b> Tell me what <b><i>racket</i></b> means.     | <b><i>Racket</i></b> means a loud noise that bothers you.                      |   | <b><i>Racket</i></b> is like a big sound. |   |                       |
| <b>Response</b>                                          |                                                                                |   |                                           |   |                       |
| <b>P 6.</b> Tell me what <b><i>squinting</i></b> means.  | <b><i>Squinting</i></b> means looking at something through partly closed eyes. |   | <b><i>Squinting</i></b> is like peeking.  |   |                       |
| <b>Response</b>                                          |                                                                                |   |                                           |   |                       |
| <b>Notes on extra exposure</b>                           |                                                                                |   |                                           |   |                       |

**CONTINUE TO NEXT PAGE FOR BOOK READING**

**Book Reading (Text + Synonym):****SAY:** “Let’s read our storybook and listen for those words!”

| <b><u>SHOW</u><br/>Book<br/>Picture</b> | <b><u>READ</u> Text</b>                                                                                | √ | <b><u>SAY</u> Synonym</b>          | √ | <b>X<br/>exposure</b> |
|-----------------------------------------|--------------------------------------------------------------------------------------------------------|---|------------------------------------|---|-----------------------|
| <b>Page 5</b>                           | -“We can scarcely hear ourselves sing with all that <b>clamor</b> .”                                   |   | <b>Clamor</b> is like noise.       |   |                       |
| <b>Page 12</b>                          | -“They continued over the hill, the catbirds flying overhead, the bear <b>grumbling</b> along behind.” |   | <b>Grumbling</b> is like whining.  |   |                       |
| <b>Page 15</b>                          | -“They came down to a <b>marsh</b> .”                                                                  |   | <b>Marsh</b> is like a swamp.      |   |                       |
| <b>Page 16</b>                          | -“They pressed on, following the muskrat, <b>peering</b> between new green shoots.”                    |   | <b>Peering</b> is like staring.    |   |                       |
| <b>Page 21</b>                          | -“AH HA!” they cried, <b>squinting</b> at a small spot on the bank.”                                   |   | <b>Squinting</b> is like peeking.  |   |                       |
| <b>Page 21</b>                          | -“How could such a speck of a thing make such a huge <b>racket</b> ?” asked the bear.”                 |   | <b>Racket</b> is like a big sound. |   |                       |
| <b>Notes on extra exposure:</b>         |                                                                                                        |   |                                    |   |                       |

**CONTINUE TO NEXT PAGE FOR REVIEW**

**Review (Context + Definition):****SAY** “Let’s think about the different words from our storybook.”

| <b><u>SHOW</u> Context<br/>Picture and <u>SAY</u></b>      | <b><u>SAY</u> Context</b>                                                               | √ | <b><u>SAY</u> Definition</b>                                            | √ | <b>X<br/>exposure</b> |
|------------------------------------------------------------|-----------------------------------------------------------------------------------------|---|-------------------------------------------------------------------------|---|-----------------------|
| R 1. What is he doing with his eyes?                       | [Click] He was <b>squinting</b> while reading the paper because it was so small.        |   | <b>Squinting</b> means looking at something through partly closed eyes. |   |                       |
| <b>Response (transcribe and highlight if questionable)</b> |                                                                                         |   |                                                                         |   |                       |
| R 2. What does she hear?                                   | [Click] The teacher asked the class to stop making <b>racket</b> during silent reading. |   | <b>Racket</b> means a loud noise that bothers you.                      |   |                       |
| <b>Response (transcribe and highlight if questionable)</b> |                                                                                         |   |                                                                         |   |                       |
| R 3. What are they doing?                                  | [Click] When <b>peering</b> out the window, they saw deer in the field.                 |   | <b>Peering</b> means looking hard or closely to see something better.   |   |                       |
| <b>Response (transcribe and highlight if questionable)</b> |                                                                                         |   |                                                                         |   |                       |
| R 4. Where are the animals?                                | [Click] Ducks and beavers live in a <b>marsh</b> because they like the water.           |   | <b>Marsh</b> means a low, wet land, often thick with tall grasses.      |   |                       |
| <b>Response (transcribe and highlight if questionable)</b> |                                                                                         |   |                                                                         |   |                       |
| R 5. What is he doing?                                     | [Click] He was <b>grumbling</b> because his mother made him clean his room.             |   | <b>Grumbling</b> means complaining in a low voice.                      |   |                       |
| <b>Response (transcribe and highlight if questionable)</b> |                                                                                         |   |                                                                         |   |                       |
| R 6. What were the people making?                          | [Click] I covered my ears because the people were making a <b>clamor</b> .              |   | <b>Clamor</b> means a loud sound that goes on for some time.            |   |                       |
| <b>Response (transcribe and highlight if questionable)</b> |                                                                                         |   |                                                                         |   |                       |
| <b>Notes on extra exposure:</b>                            |                                                                                         |   |                                                                         |   |                       |



**TREATMENT INTENSITY CONDITION**  
**36 6 dose X 6 dose frequency**  
**Set B = Treated Words**



## KU Word and Sound Learning Lab



Kindergarten Children Acquiring Words through STORYbook Reading

### TREATMENT CHECKLIST

#### SUBJECT INFORMATION

KAW Number: \_\_\_\_\_

Initials: \_\_\_\_\_

Preliminary Evaluation Dates: \_\_\_\_\_

Examiner(s): \_\_\_\_\_

Pre-treatment Testing Dates: \_\_\_\_\_

Examiner(s) (blind): \_\_\_\_\_

#### INTENSITY CONDITION:

**36 6-6 (each book 6 times)**

9-4 (each book 4 times)

4-9 (each book 9 times)

VERSION CONDITION: \_\_\_\_\_

VERSION A

VERSION B

| Treatment                               | Control                                |
|-----------------------------------------|----------------------------------------|
| Book 1: Caterpillar that Roared         | Book 1: Imogene's Antlers              |
| Book 2: What do you do with a Kangaroo? | Book 2: Otis                           |
| Book 3: Bear Under the Stairs           | Book 3: Shy Charles                    |
| Book 4: Book! Book! Book!               | Book 4: Harry and the Terrible Whatzit |
| Book 5: Swimmy                          | Book 5: Possum and the Peeper          |

TREATMENT PROVIDER (LIST ALL IF MORE THAN ONE): \_\_\_\_\_

**SESSION SCHEDULE (2-3 SESSIONS PER WEEK)****INTENSITY 36: DOSE 6 (2 SESSIONS PER WEEK = 7 ½ WEEKS OR 3 SESSIONS PER WEEK = 5 WEEKS)**

|                                                                                       |                                                                                 |
|---------------------------------------------------------------------------------------|---------------------------------------------------------------------------------|
| <b>Session 1.1:</b>                                                                   | <b>Session 1.2:</b>                                                             |
| Book 1 (1st): Caterpillar that Roared<br>Book 2 (1st): What do you do with a Kangaroo | Book 3 (1st): Bear Under the Stairs<br>Book 4 (1st): Book! Book! Book!          |
| <b>Session 1.3:</b>                                                                   | <b>Session 1.4:</b>                                                             |
| Book 5 (1st): Swimmy<br>Book 1 (2nd): Caterpillar that Roared                         | Book 2 (2nd): What do you do with a Kangaroo<br>Book 4 (2nd): Book! Book! Book! |
| <b>Session 1.5:</b>                                                                   | <b>Session 1.6:</b>                                                             |
| Book 3 (2nd): Bear Under the Stairs<br>Book 5 (2nd): Swimmy                           | Book 1 (3rd): Caterpillar that Roared<br>Book 4 (3rd): Book! Book! Book!        |
| <b>Session 1.7:</b>                                                                   | <b>Session 1.8:</b>                                                             |
| Book 2 (3rd): What do you do with a Kangaroo<br>Book 5 (3rd): Swimmy                  | Book 3 (3rd): Bear Under the Stairs<br>Book 1 (4th): Caterpillar that Roared    |
| <b>Session 1.9:</b>                                                                   | <b>Session 1.10:</b>                                                            |
| Book 4 (4th): Book! Book! Book!<br>Book 2 (4th): What do you do with a Kangaroo       | Book 5 (4th): Swimmy<br>Book 3 (4th): Bear Under the Stairs                     |
| <b>Session 1.11:</b>                                                                  | <b>Session 1.12:</b>                                                            |
| Book 2 (5th): What do you do with a Kangaroo<br>Book 1 (5th): Caterpillar that Roared | Book 4 (5th): Book! Book! Book!<br>Book 3 (5th): Bear Under the Stairs          |
| <b>Session 1.13:</b>                                                                  | <b>Session 1.14:</b>                                                            |
| Book 1 (6th): Caterpillar that Roared<br>Book 5 (5th): Swimmy                         | Book 4 (6th): Book! Book! Book!<br>Book 2 (6th): What do you do with a Kangaroo |
| <b>Session 1.15:</b>                                                                  |                                                                                 |
| Book 5 (6th): Swimmy<br>Book 3 (6th): Bear Under the Stairs                           |                                                                                 |

Post-treatment Testing Dates: \_\_\_\_\_ Examiner (blind): \_\_\_\_\_

Participant Number: \_\_\_\_\_ Examiner: \_\_\_\_\_ Date: \_\_\_\_\_  
 Treatment Session Number: \_\_\_\_\_  
 Dose = 6; Dose Frequency = 6 Dose Frequency for this Training (circle 1): 1 2 3 4 5 6

Videotape Number: \_\_\_\_\_ Start time: \_\_\_\_\_ End time: \_\_\_\_\_ Session Length: \_\_\_\_\_

**Preview (Definition + Synonym):**

**SAY:** "Let's look at some of the words we'll hear in our storybook."

| <b><u>SHOW Definition</u></b><br><b><u>Picture and SAY</u></b> | <b><u>SAY Definition</u></b>                                              | √ | <b><u>SAY Synonym</u></b>                   | √ | <b>X exposure</b> |
|----------------------------------------------------------------|---------------------------------------------------------------------------|---|---------------------------------------------|---|-------------------|
| <b>P 1.</b> Tell me what <b><i>gaze</i></b> means.             | <b><i>Gaze</i></b> means to look at something for a long time.            |   | <b><i>Gaze</i></b> is like stare.           |   |                   |
| <b>Response</b>                                                |                                                                           |   |                                             |   |                   |
| <b>P 2.</b> Tell me what <b><i>horrified</i></b> means.        | <b><i>Horrified</i></b> means a feeling of being scared.                  |   | <b><i>Horrified</i></b> is like frightened. |   |                   |
| <b>Response</b>                                                |                                                                           |   |                                             |   |                   |
| <b>P 3.</b> Tell me what <b><i>ripples</i></b> means.          | <b><i>Ripples</i></b> mean small waves made from moving.                  |   | <b><i>Ripples</i></b> is like bumpy water.  |   |                   |
| <b>Response</b>                                                |                                                                           |   |                                             |   |                   |
| <b>P 4.</b> Tell me what <b><i>snuggled</i></b> means.         | <b><i>Snuggled</i></b> means to lay in a comfortable way next to someone. |   | <b><i>Snuggled</i></b> is like cuddled.     |   |                   |
| <b>Response</b>                                                |                                                                           |   |                                             |   |                   |
| <b>P 5.</b> Tell me what <b><i>surface</i></b> means.          | <b><i>Surface</i></b> means the outside part of something.                |   | <b><i>Surface</i></b> is like top.          |   |                   |
| <b>Response</b>                                                |                                                                           |   |                                             |   |                   |
| <b>P 6.</b> Tell me what <b><i>twitch</i></b> means.           | <b><i>Twitch</i></b> means to move quickly and suddenly.                  |   | <b><i>Twitch</i></b> is like shake.         |   |                   |
| <b>Response</b>                                                |                                                                           |   |                                             |   |                   |
| <b>Notes on extra exposure:</b>                                |                                                                           |   |                                             |   |                   |

**CONTINUE TO NEXT PAGE FOR BOOK READING**

**Book Reading (Text + Synonym):****SAY:** “Let’s read our storybook and listen for those words!”

| <b><u>SHOW</u><br/>Book<br/>Picture</b> | <b><u>READ</u> Text</b>                                                                                                   | √ | <b><u>SAY</u><br/>Synonym</b>               | √ | <b>X<br/>exposure</b> |
|-----------------------------------------|---------------------------------------------------------------------------------------------------------------------------|---|---------------------------------------------|---|-----------------------|
| <b>Page 2</b>                           | “Every morning when he woke up he would <b><i>gaze</i></b> at himself in the mirror.”                                     |   | <b><i>Gaze</i></b> is like stare.           |   |                       |
| <b>Page 3</b>                           | “He would pull himself up as tall as he could, toss his imaginary mane, and <b><i>twitch</i></b> his imaginary whiskers.” |   | <b><i>Twitch</i></b> is like shake.         |   |                       |
| <b>Page 17</b>                          | “Ferdinand the fish was preparing his dinner below the <b><i>surface</i></b> .”                                           |   | <b><i>Surface</i></b> is like top.          |   |                       |
| <b>Page 17</b>                          | “Ferdinand saw a huge and fearsome creature through the <b><i>ripples</i></b> .”                                          |   | <b><i>Ripples</i></b> is like bumpy water.  |   |                       |
| <b>Page 21</b>                          | “Hugo was <b><i>horrified</i></b> .”                                                                                      |   | <b><i>Horrified</i></b> is like frightened. |   |                       |
| <b>Page 24</b>                          | “That night, Hugo <b><i>snuggled</i></b> down to sleep.”                                                                  |   | <b><i>Snuggled</i></b> is like cuddled.     |   |                       |
| <b>Notes on extra exposure:</b>         |                                                                                                                           |   |                                             |   |                       |

**CONTINUE TO NEXT PAGE FOR REVIEW**

**Review (Context + Definition):**

**SAY** “Let’s think about the different words from our storybook.”

| <b><u>SHOW</u> Context<br/>Picture and<br/><u>SAY</u></b>                                             | <b><u>SAY</u> Context</b>                                                                         | √ | <b><u>SAY</u> Definition</b>                                              | √ | <b>X<br/>exposure</b> |
|-------------------------------------------------------------------------------------------------------|---------------------------------------------------------------------------------------------------|---|---------------------------------------------------------------------------|---|-----------------------|
| <b>R 1.</b> What does the cow’s tail do?                                                              | <b>[Click]</b> The cow needed to <b><i>twitch</i></b> his tail to get the fly off his back.       |   | <b><i>Twitch</i></b> means to move quickly and suddenly.                  |   |                       |
| <b>Response (transcribe and highlight if questionable) (transcribe and highlight if questionable)</b> |                                                                                                   |   |                                                                           |   |                       |
| <b>R 2.</b> What part of the table did he paint?                                                      | <b>[Click]</b> The man painted the <b><i>surface</i></b> of the picnic table brown.               |   | <b><i>Surface</i></b> means the outside part of something.                |   |                       |
| <b>Response (transcribe and highlight if questionable)</b>                                            |                                                                                                   |   |                                                                           |   |                       |
| <b>R 3.</b> What did the people do?                                                                   | <b>[Click]</b> When I watched the movie, I <b><i>snuggled</i></b> next to my mom.                 |   | <b><i>Snuggled</i></b> means to lay in a comfortable way next to someone. |   |                       |
| <b>Response (transcribe and highlight if questionable)</b>                                            |                                                                                                   |   |                                                                           |   |                       |
| <b>R 4.</b> What are the bumps on the water?                                                          | <b>[Click]</b> My toes made small <b><i>ripples</i></b> in the swimming pool.                     |   | <b><i>Ripples</i></b> mean small waves made from moving.                  |   |                       |
| <b>Response (transcribe and highlight if questionable)</b>                                            |                                                                                                   |   |                                                                           |   |                       |
| <b>R 5.</b> How did he feel?                                                                          | <b>[Click]</b> After going through the haunted house, he was <b><i>horrified</i></b> of ghosts.   |   | <b><i>Horrified</i></b> means a feeling of being scared.                  |   |                       |
| <b>Response (transcribe and highlight if questionable)</b>                                            |                                                                                                   |   |                                                                           |   |                       |
| <b>R 6.</b> What does he do?                                                                          | <b>[Click]</b> The little boy likes to <b><i>gaze</i></b> at the TV when his favorite show is on. |   | <b><i>Gaze</i></b> means to look at something for a long time.            |   |                       |
| <b>Response (transcribe and highlight if questionable)</b>                                            |                                                                                                   |   |                                                                           |   |                       |
| <b>Notes on extra exposure:</b>                                                                       |                                                                                                   |   |                                                                           |   |                       |

Participant Number: \_\_\_\_\_ Examiner: \_\_\_\_\_ Date: \_\_\_\_\_  
 Treatment Session Number: \_\_\_\_\_  
 Dose = 6; Dose Frequency = 6      Dose Frequency for this Training (circle 1): 1 2 3 4 5 6

Videotape Number: \_\_\_\_\_ Start time: \_\_\_\_\_ End time: \_\_\_\_\_ Session Length: \_\_\_\_\_

**Preview (Definition + Synonym):**

**SAY:** "Let's look at some of the words we'll hear in our storybook."

| <b><u>SHOW</u> Definition<br/>Picture and <u>SAY</u></b> | <b><u>SAY</u> Definition</b>                                            | √ | <b><u>SAY</u> Synonym</b>               | √ | <b>X<br/>exposure</b> |
|----------------------------------------------------------|-------------------------------------------------------------------------|---|-----------------------------------------|---|-----------------------|
| <b>P 1.</b> Tell me what <b><i>flashing</i></b> means.   | <b><i>Flashing</i></b> means a sudden bright light that goes away fast. |   | <b><i>Flashing</i></b> is like blazing. |   |                       |
| <b>Response</b>                                          |                                                                         |   |                                         |   |                       |
| <b>P 2.</b> Tell me what <b><i>frayed</i></b> means.     | <b><i>Frayed</i></b> means to have rubbed thin or come apart.           |   | <b><i>Frayed</i></b> is like torn.      |   |                       |
| <b>Response</b>                                          |                                                                         |   |                                         |   |                       |
| <b>P 3.</b> Tell me what <b><i>smooth</i></b> means.     | <b><i>Smooth</i></b> means flat and not rough.                          |   | <b><i>Smooth</i></b> is like even.      |   |                       |
| <b>Response</b>                                          |                                                                         |   |                                         |   |                       |
| <b>P 4.</b> Tell me what <b><i>stale</i></b> means.      | <b><i>Stale</i></b> means not fresh or not tasting good.                |   | <b><i>Stale</i></b> is like old.        |   |                       |
| <b>Response</b>                                          |                                                                         |   |                                         |   |                       |
| <b>P 5.</b> Tell me what <b><i>tailor</i></b> means.     | <b><i>Tailor</i></b> means a person who makes or fixes clothes.         |   | <b><i>Tailor</i></b> is like sew-er.    |   |                       |
| <b>Response</b>                                          |                                                                         |   |                                         |   |                       |
| <b>P 6.</b> Tell me what <b><i>worn</i></b> means.       | <b><i>Worn</i></b> means to become thin or torn from use.               |   | <b><i>Worn</i></b> is like damaged.     |   |                       |
| <b>Response</b>                                          |                                                                         |   |                                         |   |                       |
| <b>Notes on extra exposure:</b>                          |                                                                         |   |                                         |   |                       |

**CONTINUE TO NEXT PAGE FOR BOOK READING**

**Book Reading (Text + Synonym):**

**SAY:** “Let’s read our storybook and listen for those words!”

| <b><u>SHOW</u> Book<br/>Picture</b> | <b><u>READ</u> Text</b>                                                                                                                          | √ | <b><u>SAY</u><br/>Synonym</b>    | √ | <b>X<br/>exposure</b> |
|-------------------------------------|--------------------------------------------------------------------------------------------------------------------------------------------------|---|----------------------------------|---|-----------------------|
| <b>Page 1</b>                       | “I never sleep on wrinkled sheets, so change them now and make them <b>smooth</b> .”                                                             |   | <b>Smooth</b> is like even.      |   |                       |
| <b>Page 4</b>                       | “He says to you, ‘This toothpaste you use is much too sweet, and your toothbrush, I’m sorry to say, is all <b>worn</b> .’”                       |   | <b>Worn</b> is like damaged.     |   |                       |
| <b>Page 10</b>                      | “The knees are snug, and the button is gone, and the cuffs are <b>frayed</b> .”                                                                  |   | <b>Frayed</b> is like torn.      |   |                       |
| <b>Page 10</b>                      | “For goodness sake, the seam is ripped—so send these right off to the <b>tailor</b> .”                                                           |   | <b>Tailor</b> is like sew-er.    |   |                       |
| <b>Page 13</b>                      | “He says to you, ‘This cereal is <b>stale</b> .’”                                                                                                |   | <b>Stale</b> is like old.        |   |                       |
| <b>Page 21</b>                      | “What do you do if you want to go riding but there on your red-painted tricycle seat sits a grown Bengal Tiger with <b>flashing</b> green eyes?” |   | <b>Flashing</b> is like blazing. |   |                       |

**Notes on extra exposure:**

**CONTINUE TO NEXT PAGE FOR REVIEW**

**Review (Context + Definition):**

**SAY** “Let’s think about the different words from our storybook.”

| <b><u>SHOW</u> Context<br/>Picture and<br/><u>SAY</u></b>  | <b><u>SAY</u> Context</b>                                                                | <b><u>SAY</u> Definition</b>                                     | <b>X<br/>exposure</b> |
|------------------------------------------------------------|------------------------------------------------------------------------------------------|------------------------------------------------------------------|-----------------------|
| <b>R 1.</b> How does the blanket look?                     | <b>[Click]</b> The blanket I slept with every night was <b>worn</b> .                    | <b>Worn</b> means to become thin or torn from use.               |                       |
| <b>Response (transcribe and highlight if questionable)</b> |                                                                                          |                                                                  |                       |
| <b>R 2.</b> Who is she?                                    | <b>[Click]</b> The <b>tailor</b> fixed my dress that had a big hole.                     | <b>Tailor</b> means a person who makes or fixes clothes.         |                       |
| <b>Response (transcribe and highlight if questionable)</b> |                                                                                          |                                                                  |                       |
| <b>R 3.</b> How do the chips taste?                        | <b>[Click]</b> The chips were <b>stale</b> because the bag was left open for three days. | <b>Stale</b> means not fresh and not tasting good.               |                       |
| <b>Response (transcribe and highlight if questionable)</b> |                                                                                          |                                                                  |                       |
| <b>R 4.</b> How does his skin feel?                        | <b>[Click]</b> My dad's face was <b>smooth</b> because he shaved off his beard.          | <b>Smooth</b> means flat and not rough.                          |                       |
| <b>Response (transcribe and highlight if questionable)</b> |                                                                                          |                                                                  |                       |
| <b>R 5.</b> How does the rope look?                        | <b>[Click]</b> The rope was <b>frayed</b> because many kids climbed it every day.        | <b>Frayed</b> means to have rubbed thin or come apart.           |                       |
| <b>Response (transcribe and highlight if questionable)</b> |                                                                                          |                                                                  |                       |
| <b>R 6.</b> What is the lightning doing?                   | <b>[Click]</b> The <b>flashing</b> lightning lights up the summer night sky.             | <b>Flashing</b> means a sudden bright light that goes away fast. |                       |
| <b>Response (transcribe and highlight if questionable)</b> |                                                                                          |                                                                  |                       |
| <b>Notes on extra exposure:</b>                            |                                                                                          |                                                                  |                       |



Participant Number: \_\_\_\_\_ Examiner: \_\_\_\_\_ Date: \_\_\_\_\_

Treatment Session Number: \_\_\_\_\_

Dose = 6; Dose Frequency = 6      Dose Frequency for this Training (circle 1): 1 2 3 4 5 6

Videotape Number: \_\_\_\_\_ Start time: \_\_\_\_\_ End time: \_\_\_\_\_ Session Length: \_\_\_\_\_

**Preview (Definition + Synonym):****SAY:** "Let's look at some of the words we'll hear in our storybook."

| <b><u>SHOW</u> Definition<br/>Picture and <u>SAY</u></b> | <b><u>SAY</u> Definition</b>                                       | √ | <b><u>SAY</u> Synonym</b>                   | √ | <b>X<br/>exp.</b> |
|----------------------------------------------------------|--------------------------------------------------------------------|---|---------------------------------------------|---|-------------------|
| <b>P 1.</b> Tell me what <b><i>awful</i></b> means.      | <b><i>Awful</i></b> means something that is very terrible.         |   | <b><i>Awful</i></b> is like bad.            |   |                   |
| <b>Response</b>                                          |                                                                    |   |                                             |   |                   |
| <b>P 2.</b> Tell me what <b><i>crept</i></b> means.      | <b><i>Crept</i></b> means to have moved slowly and quietly.        |   | <b><i>Crept</i></b> is like sneaked.        |   |                   |
| <b>Response</b>                                          |                                                                    |   |                                             |   |                   |
| <b>P 3.</b> Tell me what <b><i>decided</i></b> means.    | <b><i>Decided</i></b> means to make up one's mind.                 |   | <b><i>Decided</i></b> is like chose.        |   |                   |
| <b>Response</b>                                          |                                                                    |   |                                             |   |                   |
| <b>P 4.</b> Tell me what <b><i>haddock</i></b> means.    | <b><i>Haddock</i></b> means a fish that can be eaten as food.      |   | <b><i>Haddock</i></b> is like fish.         |   |                   |
| <b>Response</b>                                          |                                                                    |   |                                             |   |                   |
| <b>P 5.</b> Tell me what <b><i>noticed</i></b> means.    | <b><i>Noticed</i></b> means to look or pay attention to something. |   | <b><i>Noticed</i></b> is like recognized.   |   |                   |
| <b>Response</b>                                          |                                                                    |   |                                             |   |                   |
| <b>P 6.</b> Tell me what <b><i>tight</i></b> means.      | <b><i>Tight</i></b> means to hold closely in place.                |   | <b><i>Tight</i></b> is like close together. |   |                   |
| <b>Response</b>                                          |                                                                    |   |                                             |   |                   |
| <b>Notes on extra exposure:</b>                          |                                                                    |   |                                             |   |                   |

**CONTINUE TO NEXT PAGE FOR BOOK READING**

**Book Reading (Text + Synonym):****SAY:** "Let's read our storybook and listen for those words!"

| <b><u>SHOW</u><br/>Book<br/>Picture</b> | <b><u>READ</u> Text</b>                                                              | √ | <b><u>SAY</u> Synonym</b>            | √ | <b>X<br/>exp.</b> |
|-----------------------------------------|--------------------------------------------------------------------------------------|---|--------------------------------------|---|-------------------|
| <b>Page 7</b>                           | "William <b>crept</b> down the hall..."                                              |   | <b>Crept</b> is like sneaked.        |   |                   |
| <b>Page 9</b>                           | "William had kept his eyes shut <b>tight</b> "                                       |   | <b>Tight</b> is like close together. |   |                   |
| <b>Page 16</b>                          | "He fed it hazelnuts, <b>haddock</b> , and honey."                                   |   | <b>Haddock</b> is like fish.         |   |                   |
| <b>Page 18</b>                          | "The smell got stronger and stronger until William's mom <b>noticed</b> it."         |   | <b>Noticed</b> is like recognized.   |   |                   |
| <b>Page 18</b>                          | "She said, 'What's that <b>awful</b> smell!'"                                        |   | <b>Awful</b> is like bad.            |   |                   |
| <b>Page 21</b>                          | "Then William and Mom <b>decided</b> to scare the bear that lived under the stairs." |   | <b>Decided</b> is like chose.        |   |                   |
| <b>Notes on extra exposure:</b>         |                                                                                      |   |                                      |   |                   |

**CONTINUE TO NEXT PAGE FOR REVIEW**

**Review (Naming + Context + Definition):****SAY** “Let’s think about the different words from our storybook.”

| <b><u>SHOW</u></b><br><b>Context</b><br><b>Picture and</b><br><b>SAY</b> | <b><u>SAY</u> Context</b>                                                           | √ | <b><u>SAY</u> Definition</b>                                | √ | <b>X</b><br><b>exp.</b> |
|--------------------------------------------------------------------------|-------------------------------------------------------------------------------------|---|-------------------------------------------------------------|---|-------------------------|
| <b>R 1.</b> How is she holding the ball?                                 | <b>[Click]</b> She held her ball <b>tight</b> so she wouldn’t lose it at the beach. |   | <b>Tight</b> means to hold closely in place.                |   |                         |
| <b>Response (transcribe and highlight if questionable)</b>               |                                                                                     |   |                                                             |   |                         |
| <b>R 2.</b> What did her friends do?                                     | <b>[Click]</b> Her friends <b>noticed</b> that she was wearing new glasses.         |   | <b>Noticed</b> means to look or pay attention to something. |   |                         |
| <b>Response (transcribe and highlight if questionable)</b>               |                                                                                     |   |                                                             |   |                         |
| <b>R 3.</b> What’s this? [Point to fish]                                 | <b>[Click]</b> Yesterday, I went fishing with my dad and caught a <b>haddock</b> .  |   | <b>Haddock</b> means a fish that can be eaten as food.      |   |                         |
| <b>Response (transcribe and highlight if questionable)</b>               |                                                                                     |   |                                                             |   |                         |
| <b>R 4.</b> What did he do?                                              | <b>[Click]</b> The boy <b>decided</b> to play with the yellow cup.                  |   | <b>Decided</b> means to make up one’s mind.                 |   |                         |
| <b>Response (transcribe and highlight if questionable)</b>               |                                                                                     |   |                                                             |   |                         |
| <b>R 5.</b> What did the girl do?                                        | <b>[Click]</b> My sister <b>crept</b> up behind my dad and made him laugh.          |   | <b>Crept</b> means to have moved slowly and quietly.        |   |                         |
| <b>Response (transcribe and highlight if questionable)</b>               |                                                                                     |   |                                                             |   |                         |
| <b>R 6.</b> How does the girl feel?                                      | <b>[Click]</b> I felt <b>awful</b> so my mom gave me a hug.                         |   | <b>Awful</b> means something that is very terrible.         |   |                         |
| <b>Response (transcribe and highlight if questionable)</b>               |                                                                                     |   |                                                             |   |                         |
| <b>Notes on extra exposure:</b>                                          |                                                                                     |   |                                                             |   |                         |

Participant Number \_\_\_\_\_ Examiner: \_\_\_\_\_ Date: \_\_\_\_\_

Treatment Session Number: \_\_\_\_\_

Dose = 6; Dose Frequency = 6 Dose Frequency for this Training (circle 1): 1 2 3 4 5 6

Videotape Number: \_\_\_\_\_ Start time: \_\_\_\_\_ End time: \_\_\_\_\_ Session Length: \_\_\_\_\_

**Preview (Definition + Synonym):****SAY:** "Let's look at some of the words we'll hear in our storybook."

| <b><u>SHOW</u></b><br><b>Definition</b><br><b>Picture and</b><br><b>SAY</b> | <b><u>SAY</u> Definition</b>                                                | √ | <b><u>SAY</u> Synonym</b>                  | √ | <b>X</b><br><b>exposure</b> |
|-----------------------------------------------------------------------------|-----------------------------------------------------------------------------|---|--------------------------------------------|---|-----------------------------|
| <b>P 1.</b> Tell me what <b><i>gathered</i></b> means.                      | <b><i>Gathered</i></b> means to have brought together in one place.         |   | <b><i>Gathered</i></b> is like collected.  |   |                             |
| <b>Response</b>                                                             |                                                                             |   |                                            |   |                             |
| <b>P 2.</b> Tell me what <b><i>heaved</i></b> means.                        | <b><i>Heaved</i></b> means to do something with great effort.               |   | <b><i>Heaved</i></b> is like lifted.       |   |                             |
| <b>Response</b>                                                             |                                                                             |   |                                            |   |                             |
| <b>P 3.</b> Tell me what <b><i>pouted</i></b> means.                        | <b><i>Pouted</i></b> means to look upset by pushing out the lips.           |   | <b><i>Pouted</i></b> is like frowned.      |   |                             |
| <b>Response</b>                                                             |                                                                             |   |                                            |   |                             |
| <b>P 4.</b> Tell me what <b><i>ruffle</i></b> means.                        | <b><i>Ruffle</i></b> means to move something that is even to make it messy. |   | <b><i>Ruffle</i></b> is like disturb.      |   |                             |
| <b>Response</b>                                                             |                                                                             |   |                                            |   |                             |
| <b>P 5.</b> Tell me what <b><i>squawked</i></b> means.                      | <b><i>Squawked</i></b> means to say loudly you don't like something.        |   | <b><i>Squawked</i></b> is like complained. |   |                             |
| <b>Response</b>                                                             |                                                                             |   |                                            |   |                             |
| <b>P 6.</b> Tell me what <b><i>whinnied</i></b> means.                      | <b><i>Whinnied</i></b> means to make a gentle sound, usually by a horse.    |   | <b><i>Whinnied</i></b> is like neigh.      |   |                             |
| <b>Response</b>                                                             |                                                                             |   |                                            |   |                             |
| <b>Notes on extra exposure:</b>                                             |                                                                             |   |                                            |   |                             |

**CONTINUE TO NEXT PAGE FOR BOOK READING**

**Book Reading (Text + Synonym):****SAY:** "Let's read our storybook and listen for those words!"

| <b><u>SHOW</u><br/>Book<br/>Picture</b> | <b><u>READ</u> Text</b>                                                                                                                                        | √ | <b><u>SAY</u> Synonym</b>           | √ | <b>X<br/>exposure</b> |
|-----------------------------------------|----------------------------------------------------------------------------------------------------------------------------------------------------------------|---|-------------------------------------|---|-----------------------|
| <b>Page 4</b>                           | "...no one to scratch behind their ears or <b>ruffle</b> their feathers."                                                                                      |   | <b>Ruffle</b> is like disturb.      |   |                       |
| <b>Page 6</b>                           | The pig <b>pouted</b> .                                                                                                                                        |   | <b>Pouted</b> is like frowned.      |   |                       |
| <b>Page 6</b>                           | "...the hen <b>heaved</b> a sigh..."                                                                                                                           |   | <b>Heaved</b> is like lifted.       |   |                       |
| <b>Page 7</b>                           | "Long about noon, with the sun high above the barnyard, the hen stood up. 'I'm bored! And I'm heading to town to find something to do!' she <b>squawked</b> ." |   | <b>Squawked</b> is like complained. |   |                       |
| <b>Page 9</b>                           | "Neigh! Neigh!' <b>whinnied</b> the horse."                                                                                                                    |   | <b>Whinnied</b> is like neigh.      |   |                       |
| <b>Page 24</b>                          | "Back at the farm, the horse, the cow, the goat, the pig, the duck, and the hen <b>gathered</b> around the books."                                             |   | <b>Gathered</b> is like collected.  |   |                       |
| <b>Notes on extra review:</b>           |                                                                                                                                                                |   |                                     |   |                       |

**CONTINUE TO NEXT PAGE FOR REVIEW**

**Review (Context + Definition):**

**SAY** "Let's think about the different words from our storybook."

| <b><u>SHOW</u></b><br><b>Context</b><br><b>Picture and</b><br><b>SAY</b> | <b><u>SAY</u> Context</b>                                                              | ✓ | <b><u>SAY</u> Definition</b>                                         | ✓ | <b>X</b><br><b>exposure</b> |
|--------------------------------------------------------------------------|----------------------------------------------------------------------------------------|---|----------------------------------------------------------------------|---|-----------------------------|
| <b>R 1.</b> What did the horse do?                                       | <b>[Click]</b> The big white horse <b>whinnied</b> when I pet his head.                |   | <b>Whinnied</b> means to make a gentle sound, usually by a horse.    |   |                             |
| <b>Response (transcribe and highlight if questionable)</b>               |                                                                                        |   |                                                                      |   |                             |
| <b>R 2.</b> What did the mom do?                                         | <b>[Click]</b> Mom <b>squawked</b> for a long time when she saw the mess we made.      |   | <b>Squawked</b> means to say loudly you don't like something.        |   |                             |
| <b>Response (transcribe and highlight if questionable)</b>               |                                                                                        |   |                                                                      |   |                             |
| <b>R 3.</b> What does he do to the boy's hair?                           | <b>[Click]</b> Dad likes to <b>ruffle</b> my hair and make me laugh.                   |   | <b>Ruffle</b> means to move something that is even to make it messy. |   |                             |
| <b>Response (transcribe and highlight if questionable)</b>               |                                                                                        |   |                                                                      |   |                             |
| <b>R 4.</b> What did the girl do?                                        | <b>[Click]</b> The girl <b>pouted</b> because she didn't want to share her basketball. |   | <b>Pouted</b> means to look upset by pushing out the lips.           |   |                             |
| <b>Response (transcribe and highlight if questionable)</b>               |                                                                                        |   |                                                                      |   |                             |
| <b>R 5.</b> What did she do with her backpack?                           | <b>[Click]</b> The young girl <b>heaved</b> her heavy backpack over her shoulder.      |   | <b>Heaved</b> means to do something with great effort.               |   |                             |
| <b>Response (transcribe and highlight if questionable)</b>               |                                                                                        |   |                                                                      |   |                             |
| <b>R 6.</b> What did he do with his toys?                                | <b>[Click]</b> He <b>gathered</b> all of his toys and put them in a basket.            |   | <b>Gathered</b> means to have brought together in one place.         |   |                             |
| <b>Response (transcribe and highlight if questionable)</b>               |                                                                                        |   |                                                                      |   |                             |
| <b>Notes on extra exposure:</b>                                          |                                                                                        |   |                                                                      |   |                             |

Participant Number \_\_\_\_\_ Examiner: \_\_\_\_\_ Date: \_\_\_\_\_

Treatment Session Number: \_\_\_\_\_

Dose = 6; Dose Frequency = 6

Dose Frequency for this Training (circle 1): 1 2 3 4 5 6

Videotape Number: \_\_\_\_\_ Start time: \_\_\_\_\_ End time: \_\_\_\_\_ Session Length: \_\_\_\_\_

**Preview (Definition + Synonym):****SAY:** "Let's look at some of the words we'll hear in our storybook."

| <b><u>SHOW Definition</u></b><br><b><u>Picture and SAY</u></b> | <b><u>SAY Definition</u></b>                                                    | √ | <b><u>SAY Synonym</u></b>               | √ | <b>X</b><br><b>exposure</b> |
|----------------------------------------------------------------|---------------------------------------------------------------------------------|---|-----------------------------------------|---|-----------------------------|
| <b>P 1.</b> Tell me what <b><i>gulp</i></b> means.             | <b><i>Gulp</i></b> means to quickly eat or drink big bites or sips              |   | <b><i>Gulp</i></b> is like swallow.     |   |                             |
| <b>Response</b>                                                |                                                                                 |   |                                         |   |                             |
| <b>P 2.</b> Tell me what <b><i>invisible</i></b> means.        | <b><i>Invisible</i></b> means not able to be seen.                              |   | <b><i>Invisible</i></b> is like hidden. |   |                             |
| <b>Response</b>                                                |                                                                                 |   |                                         |   |                             |
| <b>P 3.</b> Tell me what <b><i>marvel</i></b> means.           | <b><i>Marvel</i></b> means a person or thing that causes surprise or curiosity. |   | <b><i>Marvel</i></b> is like wonder.    |   |                             |
| <b>Response</b>                                                |                                                                                 |   |                                         |   |                             |
| <b>P 4.</b> Tell me what <b><i>midday</i></b> means.           | <b><i>Midday</i></b> means the middle part of the day.                          |   | <b><i>Midday</i></b> is like afternoon. |   |                             |
| <b>Response</b>                                                |                                                                                 |   |                                         |   |                             |
| <b>P 5.</b> Tell me what <b><i>swaying</i></b> means.          | <b><i>Swaying</i></b> means swinging back and forth or side to side.            |   | <b><i>Swaying</i></b> is like rocking.  |   |                             |
| <b>Response</b>                                                |                                                                                 |   |                                         |   |                             |
| <b>P 6.</b> Tell me what <b><i>swift</i></b> means.            | <b><i>Swift</i></b> means moving quickly, with great speed.                     |   | <b><i>Swift</i></b> is like fast.       |   |                             |
| <b>Response</b>                                                |                                                                                 |   |                                         |   |                             |
| <b>Notes on extra exposure:</b>                                |                                                                                 |   |                                         |   |                             |

**CONTINUE TO NEXT PAGE FOR BOOK READING**

**Book Reading (Text + Synonym):****SAY:** "Let's read our storybook and listen for those words!"

| <b><u>SHOW</u></b><br><b>Book</b><br><b>Picture</b> | <b><u>READ</u></b> Text                                                                                     | √ <b><u>SAY</u></b> Synonym      | √ <b>X</b><br>exposur<br>e |
|-----------------------------------------------------|-------------------------------------------------------------------------------------------------------------|----------------------------------|----------------------------|
| <b>Page 3</b>                                       | "One bad day, they met a tuna fish, <b>swift</b> , fierce and very hungry."                                 | <b>Swift</b> is like fast.       |                            |
| <b>Page 3</b>                                       | "He swallowed all the little red fish in one <b>gulp</b> ."                                                 | <b>Gulp</b> is like swallow.     |                            |
| <b>Page 6</b>                                       | "But the sea was full of wonderful creatures, and as he swam to each <b>marvel</b> Swimmy was happy again." | <b>Marvel</b> is like wonder.    |                            |
| <b>Page 10</b>                                      | "...Strange fish pulled by an <b>invisible</b> thread...."                                                  | <b>Invisible</b> is like hidden. |                            |
| <b>Page 16</b>                                      | "...and sea anemones, who looked like pink palm trees <b>swaying</b> in the wind."                          | <b>Swaying</b> is like rocking.  |                            |
| <b>Page 26</b>                                      | "And so they swam in the cool morning water and the <b>midday</b> sun and chased the big fish away."        | <b>Midday</b> is like afternoon. |                            |
| <b>Notes on extra exposure:</b>                     |                                                                                                             |                                  |                            |

**CONTINUE TO NEXT PAGE FOR REVIEW**



**Review (Context + Definition):****SAY** "Let's think about the different words from our storybook."

| <b><u>SHOW</u> Context<br/>Picture and <u>SAY</u></b>      | <b><u>SAY</u> Context</b>                                                                            | √ | <b><u>SAY</u> Definition</b>                                             | √ | <b>X<br/>exposure</b> |
|------------------------------------------------------------|------------------------------------------------------------------------------------------------------|---|--------------------------------------------------------------------------|---|-----------------------|
| <b>R 1.</b> How is the boy running?                        | <b>[Click]</b> The boy was <b>swift</b> during the race and finished in first place.                 |   | <b>Swift</b> means moving quickly, with great speed.                     |   |                       |
| <b>Response (transcribe and highlight if questionable)</b> |                                                                                                      |   |                                                                          |   |                       |
| <b>R 2.</b> What is the flag doing?                        | <b>[Click]</b> The flag was <b>swaying</b> in the wind on Tuesday night.                             |   | <b>Swaying</b> means swinging back and forth or side to side.            |   |                       |
| <b>Response (transcribe and highlight if questionable)</b> |                                                                                                      |   |                                                                          |   |                       |
| <b>R 3.</b> When is it?                                    | <b>[Click]</b> At school, we eat lunch with the other kids at <b>midday</b> .                        |   | <b>Midday</b> means the middle part of the day.                          |   |                       |
| <b>Response (transcribe and highlight if questionable)</b> |                                                                                                      |   |                                                                          |   |                       |
| <b>R 4.</b> What is the candy store?                       | <b>[Click]</b> The candy store was a <b>marvel</b> with so many different flavors!                   |   | <b>Marvel</b> means a person or thing that causes surprise or curiosity. |   |                       |
| <b>Response (transcribe and highlight if questionable)</b> |                                                                                                      |   |                                                                          |   |                       |
| <b>R 5.</b> How does the window look?                      | <b>[Click]</b> The bird flew into the window because it was <b>invisible</b> and he couldn't see it. |   | <b>Invisible</b> means not able to be seen.                              |   |                       |
| <b>Response (transcribe and highlight if questionable)</b> |                                                                                                      |   |                                                                          |   |                       |
| <b>R 6.</b> What does she do with her snack?               | <b>[Click]</b> She was so hungry that she finished her snack in one big <b>gulp</b> .                |   | <b>Gulp</b> means to quickly eat or drink big bites or sips.             |   |                       |
| <b>Response (transcribe and highlight if questionable)</b> |                                                                                                      |   |                                                                          |   |                       |
| <b>Notes on extra exposure:</b>                            |                                                                                                      |   |                                                                          |   |                       |



**TREATMENT INTENSITY CONDITION**  
**36 9 dose X 4 dose frequency**  
**Set A = Treated Words**

## KU Word and Sound Learning Lab



Kindergarten Children Acquiring Words through STORYbook Reading

### TREATMENT CHECKLIST

#### SUBJECT INFORMATION

KAW Number: \_\_\_\_\_

Initials: \_\_\_\_\_

Preliminary Evaluation Dates: \_\_\_\_\_ Examiner(s): \_\_\_\_\_

Pre-treatment Testing Dates: \_\_\_\_\_ Examiner(s) (blind): \_\_\_\_\_

#### INTENSITY CONDITION:

**36 9-4 (each book 4 times)**

6-6 (each book 6 times)

4-9 (each book 9 times)

VERSION CONDITION: \_\_\_\_\_ **VERSION A** \_\_\_\_\_ VERSION B \_\_\_\_\_

| Treatment                              | Control                                 |
|----------------------------------------|-----------------------------------------|
| Book 1: Imogene's Antlers              | Book 1: Caterpillar that Roared         |
| Book 2: Otis                           | Book 2: What do you do with a Kangaroo? |
| Book 3: Shy Charles                    | Book 3: Bear Under the Stairs           |
| Book 4: Harry and the Terrible Whatzit | Book 4: Book! Book! Book!               |
| Book 5: Possum and the Peeper          | Book 5: Swimmy                          |

TREATMENT PROVIDER (LIST ALL IF MORE THAN ONE): \_\_\_\_\_

#### SESSION SCHEDULE (2-3 SESSIONS PER WEEK)

INTENSITY 36: DOSE 9 (2 SESSIONS PER WEEK = 5 WEEKS OR 3 SESSIONS PER WEEK = 3 ½ WEEKS)

| Session 1.1:                                          | Session 1.2:                                                              |
|-------------------------------------------------------|---------------------------------------------------------------------------|
| Book 1 (1st): Imogene's Antlers<br>Book 2 (1st): Otis | Book 3 (1st): Shy Charles<br>Book 4 (1st): Harry and the Terrible Whatzit |

| Session 1.3:                                                           | Session 1.4:                                                       |
|------------------------------------------------------------------------|--------------------------------------------------------------------|
| Book 5 (1st): Possum and the Peeper<br>Book 1 (2nd): Imogene's Antlers | Book 2 (2nd): Otis<br>Book 4 (2nd): Harry and the Terrible Whatzit |

| Session 1.5:                                                     | Session 1.6:                                                                    |
|------------------------------------------------------------------|---------------------------------------------------------------------------------|
| Book 3 (2nd): Shy Charles<br>Book 5 (2nd): Possum and the Peeper | Book 1 (3rd): Imogene's Antlers<br>Book 4 (3rd): Harry and the Terrible Whatzit |

| <b>Session 1.7:</b>                                       | <b>Session 1.8:</b>                                          |
|-----------------------------------------------------------|--------------------------------------------------------------|
| Book 2 (3rd): Otis<br>Book 5 (3rd): Possum and the Peeper | Book 3 (3rd): Shy Charles<br>Book 1 (4th): Imogene's Antlers |

| <b>Session 1.9:</b>                                                | <b>Session 1.10:</b>                                             |
|--------------------------------------------------------------------|------------------------------------------------------------------|
| Book 4 (4th): Harry and the Terrible Whatzit<br>Book 2 (4th): Otis | Book 5 (4th): Possum and the Peeper<br>Book 3 (4th): Shy Charles |

Post-treatment Testing Dates: \_\_\_\_\_ Examiner (blind): \_\_\_\_\_

Participant Number: \_\_\_\_\_ Examiner: \_\_\_\_\_ Date: \_\_\_\_\_  
 Treatment Session Number: \_\_\_\_\_  
 Dose = 9; Dose Frequency = 4 Dose Frequency for this Training (circle 1): 1 2 3 4

Videotape Number: \_\_\_\_\_ Start time: \_\_\_\_\_ End time: \_\_\_\_\_ Session Length: \_\_\_\_\_

**Preview (Definition + Synonym + Context):**

**SAY:** "Let's look at some of the words we'll hear in our storybook."

| <b><u>SHOW</u> Definition<br/>Picture and <u>SAY</u></b> | <b><u>SAY</u> Definition</b>                                     | ✓ | <b><u>SAY</u><br/>Synonym</b>          | ✓ | <b><u>SAY</u> Context</b>                                                  | ✓ | <b>X<br/>exposure</b> |
|----------------------------------------------------------|------------------------------------------------------------------|---|----------------------------------------|---|----------------------------------------------------------------------------|---|-----------------------|
| <b>P 1.</b><br>Tell me what <b>advice</b> means.         | <b>Advice</b> means an idea used to help people to make choices. |   | <b>Advice</b> is like help.            |   | My teacher gave me <b>advice</b> about how to get better grades.           |   |                       |
| <b>Response</b>                                          |                                                                  |   |                                        |   |                                                                            |   |                       |
| <b>P 2.</b><br>Tell me what <b>glared</b> means.         | <b>Glared</b> means to look at someone in an angry way.          |   | <b>Glared</b> is like stared.          |   | The boy <b>glared</b> at me because he was in time out.                    |   |                       |
| <b>Response</b>                                          |                                                                  |   |                                        |   |                                                                            |   |                       |
| <b>P 3.</b><br>Tell me what <b>overjoyed</b> means.      | <b>Overjoyed</b> means filled with joy; very happy.              |   | <b>Overjoyed</b> is like excited.      |   | The little girl was <b>overjoyed</b> to play outside at the park.          |   |                       |
| <b>Response</b>                                          |                                                                  |   |                                        |   |                                                                            |   |                       |
| <b>P 4.</b><br>Tell me what <b>prodded</b> means.        | <b>Prodded</b> means to poke someone with something pointed.     |   | <b>Prodded</b> is like pushed.         |   | He <b>prodded</b> my arm with his finger to ask me a question.             |   |                       |
| <b>Response</b>                                          |                                                                  |   |                                        |   |                                                                            |   |                       |
| <b>P 5.</b><br>Tell me what <b>rare</b> means.           | <b>Rare</b> means it is not often found or seen.                 |   | <b>Rare</b> is like not usual.         |   | A man riding a unicycle is a <b>rare</b> thing to see.                     |   |                       |
| <b>Response</b>                                          |                                                                  |   |                                        |   |                                                                            |   |                       |
| <b>P 6.</b> Tell me what <b>wandered</b> means.          | <b>Wandered</b> means to move about from place to place.         |   | <b>Wandered</b> is like walked slowly. |   | My family <b>wandered</b> through the woods to see the plants and animals. |   |                       |
| <b>Response</b>                                          |                                                                  |   |                                        |   |                                                                            |   |                       |
| <b>Notes on extra exposure</b>                           |                                                                  |   |                                        |   |                                                                            |   |                       |

**CONTINUE TO NEXT PAGE FOR BOOK READING**

**Book Reading (Text + Synonym + Definition):**

**SAY:** “Let’s read our storybook and listen for those words!”

| <u>SHOW</u><br>Book<br>Picture  | <u>READ</u> Text                                                                                                                        | √ | <u>SAY</u><br>Synonym                  | √ | <u>SAY</u> Definition                                            | √ | X<br>exposure |
|---------------------------------|-----------------------------------------------------------------------------------------------------------------------------------------|---|----------------------------------------|---|------------------------------------------------------------------|---|---------------|
| Page 8                          | “The doctor poked, and <b>prodded</b> .”                                                                                                |   | <b>Prodded</b> is like pushed.         |   | <b>Prodded</b> means to poke someone with something pointed.     |   |               |
| Page 9                          | “The school principal <b>glared</b> at Imogene . . .”                                                                                   |   | <b>Glared</b> is like stared.          |   | <b>Glared</b> means to look at someone in an angry way.          |   |               |
| Page 9                          | “But the principal had no <b>advice</b> to offer.”                                                                                      |   | <b>Advice</b> is like help.            |   | <b>Advice</b> means an idea used to help people to make choices. |   |               |
| Page 10                         | “Her brother, Norman, consulted the encyclopedia, and then announced that Imogene had turned into a <b>rare</b> form of miniature elk!” |   | <b>Rare</b> is like not usual.         |   | <b>Rare</b> means it is not often found or seen.                 |   |               |
| Page 16                         | “Later, Imogene <b>wandered</b> upstairs.”                                                                                              |   | <b>Wandered</b> is like walked slowly. |   | <b>Wandered</b> means to move about from place to place.         |   |               |
| Page 25                         | “-When she came down to breakfast, the family was <b>overjoyed</b> to see her back to normal...”                                        |   | <b>Overjoyed</b> is like excited.      |   | <b>Overjoyed</b> means filled with joy; very happy.              |   |               |
| <b>Notes on extra exposure:</b> |                                                                                                                                         |   |                                        |   |                                                                  |   |               |

**CONTINUE TO NEXT PAGE FOR REVIEW**

**Review (Naming + Context + Synonym + Definition):**

**SAY** “Let’s think about the different words from our storybook.”

| <b><u>SHOW</u><br/>Context<br/>Picture<br/>and <u>SAY</u></b> | <b><u>SAY</u> Context</b>                                                                        | √ | <b><u>SAY</u> Synonym</b>              | √ | <b><u>SAY</u> Definition</b>                                     | √ | <b>X<br/>exposure</b> |
|---------------------------------------------------------------|--------------------------------------------------------------------------------------------------|---|----------------------------------------|---|------------------------------------------------------------------|---|-----------------------|
| <b>R 1.</b> What did they do?                                 | <b>[Click]</b> While waiting for soccer practice to start, we <b>wandered</b> around the school. |   | <b>Wandered</b> is like walked slowly. |   | <b>Wandered</b> means to move about from place to place.         |   |                       |
| <b>Response (transcribe and highlight if questionable)</b>    |                                                                                                  |   |                                        |   |                                                                  |   |                       |
| <b>R 2.</b> What kind of elephant is this?                    | <b>[Click]</b> It is <b>rare</b> to see an elephant in a big city.                               |   | <b>Rare</b> is like not usual.         |   | <b>Rare</b> means not often found or seen.                       |   |                       |
| <b>Response (transcribe and highlight if questionable)</b>    |                                                                                                  |   |                                        |   |                                                                  |   |                       |
| <b>R 3.</b> What did he do with his stick?                    | <b>[Click]</b> The farmer <b>prodded</b> the cow to move it into the fence.                      |   | <b>Prodded</b> is like pushed.         |   | <b>Prodded</b> means to poke someone with something pointed.     |   |                       |
| <b>Response (transcribe and highlight if questionable)</b>    |                                                                                                  |   |                                        |   |                                                                  |   |                       |
| <b>R 4.</b> How does he feel?                                 | <b>[Click]</b> He was <b>overjoyed</b> to get a puppy for his birthday.                          |   | <b>Overjoyed</b> is like excited       |   | <b>Overjoyed</b> means filled with joy; very happy.              |   |                       |
| <b>Response (transcribe and highlight if questionable)</b>    |                                                                                                  |   |                                        |   |                                                                  |   |                       |
| <b>R 5.</b> What did she do?                                  | <b>[Click]</b> I <b>glared</b> at my sister after she took my toy from me.                       |   | <b>Glared</b> is like stared.          |   | <b>Glared</b> means to look at someone in an angry way.          |   |                       |
| <b>Response (transcribe and highlight if questionable)</b>    |                                                                                                  |   |                                        |   |                                                                  |   |                       |
| <b>R 6.</b> What is he telling the boy?                       | <b>[Click]</b> Dad gave me <b>advice</b> on how to make more friends at school.                  |   | <b>Advice</b> is like help.            |   | <b>Advice</b> means an idea used to help people to make choices. |   |                       |
| <b>Response (transcribe and highlight if questionable)</b>    |                                                                                                  |   |                                        |   |                                                                  |   |                       |
| <b>Notes on extra exposure:</b>                               |                                                                                                  |   |                                        |   |                                                                  |   |                       |

Participant Number: \_\_\_\_\_ Examiner: \_\_\_\_\_ Date: \_\_\_\_\_  
 Treatment Session Number: \_\_\_\_\_

Dose = 9; Dose Frequency = 4      Dose Frequency for this Training (circle 1): 1 2 3 4

Videotape Number: \_\_\_\_\_ Start time: \_\_\_\_\_ End time: \_\_\_\_\_ Session Length: \_\_\_\_\_

**Preview (Definition + Synonym + Context):**

**SAY:** "Let's look at some of the words we'll hear in our storybook."

| <u>SHOW</u> Definition<br>Picture and SAY           | <u>SAY</u> Definition                                                         | √ | <u>SAY</u><br>Synonym                     | √ | <u>SAY</u> Context                                                               | √ | X<br>exposure |
|-----------------------------------------------------|-------------------------------------------------------------------------------|---|-------------------------------------------|---|----------------------------------------------------------------------------------|---|---------------|
| <b>P 1.</b><br>Tell me what <b>hauled</b> means.    | <b>Hauled</b> means carried with force or effort.                             |   | <b>Hauled</b> is like dragged.            |   | We <b>hauled</b> our camper with our truck during our vacation.                  |   |               |
| <b>Response:</b>                                    |                                                                               |   |                                           |   |                                                                                  |   |               |
| <b>P 2.</b><br>Tell me what <b>hooves</b> means.    | <b>Hooves</b> means hard parts on the feet of animals like horses or pigs.    |   | <b>Hooves</b> are like feet.              |   | The zebra stomped the dirt with his <b>hooves</b> and made a mess.               |   |               |
| <b>Response:</b>                                    |                                                                               |   |                                           |   |                                                                                  |   |               |
| <b>P 3.</b><br>Tell me what <b>ripe</b> means.      | <b>Ripe</b> means full grown and good to pick or eat.                         |   | <b>Ripe</b> is like ready.                |   | This banana is <b>ripe</b> and the others are not as good. [Point to banana # 6] |   |               |
| <b>Response:</b>                                    |                                                                               |   |                                           |   |                                                                                  |   |               |
| <b>P 4.</b><br>Tell me what <b>sidelines</b> means. | <b>Sidelines</b> means lines marking the sides of fields or courts in sports. |   | <b>Sidelines</b> are like boundary lines. |   | The football player waited on the <b>sidelines</b> for his turn to play.         |   |               |
| <b>Response:</b>                                    |                                                                               |   |                                           |   |                                                                                  |   |               |
| <b>P 5.</b><br>Tell me what <b>silky</b> means.     | <b>Silky</b> means soft, like a material used to make clothes.                |   | <b>Silky</b> is like shiny.               |   | This purple cloth will make a nice, <b>silky</b> shirt.                          |   |               |
| <b>Response:</b>                                    |                                                                               |   |                                           |   |                                                                                  |   |               |
| <b>P 6.</b><br>Tell me what <b>spotless</b> means.  | <b>Spotless</b> means without any dirt or spots.                              |   | <b>Spotless</b> is like very clean.       |   | After we cleaned the old bathroom, it was <b>spotless</b> .                      |   |               |
| <b>Response:</b>                                    |                                                                               |   |                                           |   |                                                                                  |   |               |

**Notes on extra exposure:**

**CONTINUE TO NEXT PAGE FOR BOOK READING**



**Book Reading (Text + Synonym + Definition):**

**SAY:** “Let’s read our storybook and listen for those words!”

| <b><u>SHOW</u><br/>Book<br/>Picture</b> | <b><u>READ</u> Text</b>                                                                         | √ | <b><u>SAY</u> Synonym</b>                        | √ | <b><u>SAY</u> Definition</b>                                                         | √ | <b>X<br/>exposure</b> |
|-----------------------------------------|-------------------------------------------------------------------------------------------------|---|--------------------------------------------------|---|--------------------------------------------------------------------------------------|---|-----------------------|
| <b>Page 1</b>                           | “He had soft, <b><i>silky</i></b> hairs.”                                                       |   | <b><i>Silky</i></b> is like shiny.               |   | <b><i>Silky</i></b> means soft, like a material used to make clothes.                |   |                       |
| <b>Page 5</b>                           | “When his brothers played rugby in the swamp, Otis kept score on the <b><i>sidelines</i></b> .” |   | <b><i>Sidelines</i></b> are like boundary lines. |   | <b><i>Sidelines</i></b> means lines marking the sides of fields or courts in sports. |   |                       |
| <b>Page 9</b>                           | “Otis tried very hard to remain a <b><i>spotless</i></b> pig.”                                  |   | <b><i>Spotless</i></b> is like very clean.       |   | <b><i>Spotless</i></b> means without any dirt or spots.                              |   |                       |
| <b>Page 13</b>                          | “Otis imagined mud oozing around his <b><i>hooves</i></b> .”                                    |   | <b><i>Hooves</i></b> are like feet.              |   | <b><i>Hooves</i></b> means hard parts on the feet of animals like horses or pigs.    |   |                       |
| <b>Page 16</b>                          | “While his brothers weeded the corn, Otis <b><i>hauled</i></b> the weeds away.”                 |   | <b><i>Hauled</i></b> is like dragged.            |   | <b><i>Hauled</i></b> means carried with force or effort.                             |   |                       |
| <b>Page 17</b>                          | “Otis’s sisters picked the <b><i>ripe</i></b> corn.”                                            |   | <b><i>Ripe</i></b> is like ready.                |   | <b><i>Ripe</i></b> means full grown and good to pick or eat.                         |   |                       |
| <b>Notes on extra exposure:</b>         |                                                                                                 |   |                                                  |   |                                                                                      |   |                       |

**CONTINUE TO NEXT PAGE FOR REVIEW**

**Review (Naming + Context + Synonym + Definition):**

**SAY** “Let’s think about the different words from our storybook.”

| <b><u>SHOW</u><br/>Context<br/>Picture and<br/>SAY</b>     | <b><u>SAY</u> Context</b>                                                                    | √ | <b><u>SAY</u> Synonym</b>                 | √ | <b><u>SAY</u> Definition</b>                                                  | √ | <b>X<br/>exposure</b> |
|------------------------------------------------------------|----------------------------------------------------------------------------------------------|---|-------------------------------------------|---|-------------------------------------------------------------------------------|---|-----------------------|
| <b>R 1.</b><br>How does the car look?                      | <b>[Click]</b> After washing the car with lots of soap, it looked <b>spotless</b> .          |   | <b>Spotless</b> is like very clean.       |   | <b>Spotless</b> means without any dirt or spots.                              |   |                       |
| <b>Response (transcribe and highlight if questionable)</b> |                                                                                              |   |                                           |   |                                                                               |   |                       |
| <b>R 2.</b><br>How is the dress?                           | <b>[Click]</b> Mom went to the store and bought a new <b>silky</b> dress.                    |   | <b>Silky</b> is like shiny.               |   | <b>Silky</b> means soft like a material used to make clothes.                 |   |                       |
| <b>Response (transcribe and highlight if questionable)</b> |                                                                                              |   |                                           |   |                                                                               |   |                       |
| <b>R 3.</b><br>Where is he sitting?                        | <b>[Click]</b> My brother was hurt so he sat on the <b>sidelines</b> at the soccer game.     |   | <b>Sidelines</b> are like boundary lines. |   | <b>Sidelines</b> means lines marking the sides of fields or courts in sports. |   |                       |
| <b>Response (transcribe and highlight if questionable)</b> |                                                                                              |   |                                           |   |                                                                               |   |                       |
| <b>R 4.</b><br>How are the strawberries ?                  | <b>[Click]</b> I like to eat <b>ripe</b> strawberries in the summertime.                     |   | <b>Ripe</b> is like ready.                |   | <b>Ripe</b> means full grown and good to pick or eat.                         |   |                       |
| <b>Response (transcribe and highlight if questionable)</b> |                                                                                              |   |                                           |   |                                                                               |   |                       |
| <b>R 5.</b><br>What are these?<br>[point to hooves]        | <b>[Click]</b> The horses kicked each other with their <b>hooves</b> when they were playing. |   | <b>Hooves</b> are like feet.              |   | <b>Hooves</b> means hard parts on the feet of animals like horses or pigs.    |   |                       |
| <b>Response (transcribe and highlight if questionable)</b> |                                                                                              |   |                                           |   |                                                                               |   |                       |
| <b>R 6.</b><br>What did the man do?                        | <b>[Click]</b> Dad <b>hauled</b> all of our heavy trash to the big trash can.                |   | <b>Hauled</b> is like dragged.            |   | <b>Hauled</b> means carried with force or effort.                             |   |                       |
| <b>Response (transcribe and highlight if questionable)</b> |                                                                                              |   |                                           |   |                                                                               |   |                       |
| <b>Notes on extra exposure:</b>                            |                                                                                              |   |                                           |   |                                                                               |   |                       |

Participant Number: \_\_\_\_\_ Examiner: \_\_\_\_\_ Date: \_\_\_\_\_  
 Treatment Session Number: \_\_\_\_\_  
 Dose = 9; Dose Frequency = 4      Dose Frequency for this Training (circle 1): 1 2 3 4

Videotape Number: \_\_\_\_\_ Start time: \_\_\_\_\_ End time: \_\_\_\_\_ Session Length: \_\_\_\_\_

**Preview (Definition + Synonym + Context):**

**SAY:** "Let's look at some of the words we'll hear in our storybook."

| <b><u>SHOW</u> Definition<br/>Picture and SAY</b>     | <b><u>SAY</u> Definition</b>                                                | √ | <b><u>SAY</u> Synonym</b>                 | √ | <b><u>SAY</u> Context</b>                                                          | √ | <b>X<br/>exposure</b> |
|-------------------------------------------------------|-----------------------------------------------------------------------------|---|-------------------------------------------|---|------------------------------------------------------------------------------------|---|-----------------------|
| <b>P 1.</b><br>Tell me what <b>embarrassed</b> means. | <b>Embarrassed</b> means to have felt foolish or upset.                     |   | <b>Embarrassed</b> is like uncomfortable. |   | She covered her eyes because she felt <b>embarrassed</b> about spilling her drink. |   |                       |
| <b>Response</b>                                       |                                                                             |   |                                           |   |                                                                                    |   |                       |
| <b>P 2.</b><br>Tell me what <b>murmured</b> means.    | <b>Murmured</b> means to have spoken in a soft, low sound.                  |   | <b>Murmured</b> is like mumbled.          |   | The boy <b>murmured</b> the secret to his friend at recess.                        |   |                       |
| <b>Response</b>                                       |                                                                             |   |                                           |   |                                                                                    |   |                       |
| <b>P 3.</b><br>Tell me what <b>nervous</b> means.     | <b>Nervous</b> means feeling scared or showing tension.                     |   | <b>Nervous</b> is like worried.           |   | The man chewed his fingernails because he was <b>nervous</b> .                     |   |                       |
| <b>Response</b>                                       |                                                                             |   |                                           |   |                                                                                    |   |                       |
| <b>P 4.</b><br>Tell me what <b>scarlet</b> means.     | <b>Scarlet</b> means a bright red color.                                    |   | <b>Scarlet</b> is like very red.          |   | This <b>scarlet</b> square is the girl's favorite color to wear.                   |   |                       |
| <b>Response</b>                                       |                                                                             |   |                                           |   |                                                                                    |   |                       |
| <b>P 5.</b><br>Tell me what <b>success</b> means.     | <b>Success</b> means a person that does well or a thing that goes well.     |   | <b>Success</b> is like a win.             |   | The man was a <b>success</b> because he finished the race in first place.          |   |                       |
| <b>Response</b>                                       |                                                                             |   |                                           |   |                                                                                    |   |                       |
| <b>P 6.</b><br>Tell me what <b>trembled</b> means.    | <b>Trembled</b> means to have shivered from being scared, cold, or excited. |   | <b>Trembled</b> is like shook.            |   | He <b>trembled</b> because it was a very cold day.                                 |   |                       |
| <b>Response</b>                                       |                                                                             |   |                                           |   |                                                                                    |   |                       |
| <b>Notes on extra exposure:</b>                       |                                                                             |   |                                           |   |                                                                                    |   |                       |

**CONTINUE TO NEXT PAGE FOR BOOK READING**

**Book Reading (Text + Synonym + Definition):****SAY:** “Let’s read our storybook and listen for those words!”

| <b><u>SHOW</u></b><br><b>Book<br/>Picture</b> | <b><u>READ</u></b> Text                               | √ | <b><u>SAY</u></b> Synonym                 | √ | <b><u>SAY</u></b> Definition                                                | √ | <b>X</b><br>exposure |
|-----------------------------------------------|-------------------------------------------------------|---|-------------------------------------------|---|-----------------------------------------------------------------------------|---|----------------------|
| <b>Page 8</b>                                 | “I’m so <b>embarrassed</b> ,’ said Charles’s mother.” |   | <b>Embarrassed</b> is like uncomfortable. |   | <b>Embarrassed</b> means to have felt foolish or upset.                     |   |                      |
| <b>Page 13</b>                                | “Charles was not a <b>success</b> .”                  |   | <b>Success</b> is like a win.             |   | <b>Success</b> means a person that does well or a thing that goes well.     |   |                      |
| <b>Page 14</b>                                | “The shirt was <b>scarlet</b> with shoulder pads.”    |   | <b>Scarlet</b> is like very red.          |   | <b>Scarlet</b> means a bright red color.                                    |   |                      |
| <b>Page 16</b>                                | “Charles <b>trembled</b> like an autumn leaf.”        |   | <b>Trembled</b> is like shook.            |   | <b>Trembled</b> means to have shivered from being scared, cold, or excited. |   |                      |
| <b>Page 19</b>                                | “Then Charles’s father <b>murmured</b> low.”          |   | <b>Murmured</b> is like mumbled.          |   | <b>Murmured</b> means to have spoken in a soft, low sound.                  |   |                      |
| <b>Page 24</b>                                | “He told her, ‘Now, don’t be <b>nervous</b> !’”       |   | <b>Nervous</b> is like worried.           |   | <b>Nervous</b> means feeling scared or showing tension.                     |   |                      |

**Notes on extra exposure:****CONTINUE TO NEXT PAGE FOR REVIEW**

**Review (Naming + Context + Synonym + Definition):****SAY** “Let’s think about the different words from our storybook.”

| <b><u>SHOW</u></b><br><b>Context</b><br><b>Picture and</b><br><b>SAY</b> | <b><u>SAY</u></b> Context                                                        | √ | <b><u>SAY</u></b> Synonym                 | √ | <b><u>SAY</u></b> Definition                                                | √ | <b>X</b><br>exposure |
|--------------------------------------------------------------------------|----------------------------------------------------------------------------------|---|-------------------------------------------|---|-----------------------------------------------------------------------------|---|----------------------|
| <b>R 1.</b><br>What did the mailman do?                                  | [Click] The mailman <b>trembled</b> because a mean dog barked at him.            |   | <b>Trembled</b> is like shook.            |   | <b>Trembled</b> means to have shivered from being scared, cold, or excited. |   |                      |
| <b>Response (transcribe and highlight if questionable)</b>               |                                                                                  |   |                                           |   |                                                                             |   |                      |
| <b>R 2.</b><br>What did they achieve?                                    | [Click] The game was a <b>success</b> and the team was happy they won.           |   | <b>Success</b> is like a win.             |   | <b>Success</b> means a person that does well or a thing that goes well.     |   |                      |
| <b>Response (transcribe and highlight if questionable)</b>               |                                                                                  |   |                                           |   |                                                                             |   |                      |
| <b>R 3.</b><br>What color are her clothes?                               | [Click] Her favorite color was <b>scarlet</b> and she wore it every day.         |   | <b>Scarlet</b> is like very red.          |   | <b>Scarlet</b> means a bright red color.                                    |   |                      |
| <b>Response (transcribe and highlight if questionable)</b>               |                                                                                  |   |                                           |   |                                                                             |   |                      |
| <b>R 4.</b><br>How does she feel?                                        | [Click] The young girl was <b>nervous</b> about her first day at her new school. |   | <b>Nervous</b> is like worried.           |   | <b>Nervous</b> means feeling scared or showing tension.                     |   |                      |
| <b>Response (transcribe and highlight if questionable)</b>               |                                                                                  |   |                                           |   |                                                                             |   |                      |
| <b>R 5.</b><br>What did the girl do?                                     | [Click] Sarah <b>murmured</b> the secret to her best friends at lunch time.      |   | <b>Murmured</b> is like mumbled.          |   | <b>Murmured</b> means to have spoken in a soft, low sound.                  |   |                      |
| <b>Response (transcribe and highlight if questionable)</b>               |                                                                                  |   |                                           |   |                                                                             |   |                      |
| <b>R 6.</b><br>How does he feel?                                         | [Click] The boy was <b>embarrassed</b> because a girl gave him a gift at school. |   | <b>Embarrassed</b> is like uncomfortable. |   | <b>Embarrassed</b> means to have felt foolish or upset.                     |   |                      |
| <b>Response (transcribe and highlight if questionable)</b>               |                                                                                  |   |                                           |   |                                                                             |   |                      |
| <b>Notes on extra exposure:</b>                                          |                                                                                  |   |                                           |   |                                                                             |   |                      |

Participant Number: \_\_\_\_\_ Examiner: \_\_\_\_\_ Date: \_\_\_\_\_

Treatment Session Number: \_\_\_\_\_

Dose = 9; Dose Frequency = 4 Dose Frequency for this Training (circle 1): 1 2 3 4

|                                                                                 |
|---------------------------------------------------------------------------------|
| Videotape Number: _____ Start time: _____ End time: _____ Session Length: _____ |
|---------------------------------------------------------------------------------|

**Preview (Definition + Synonym + Context):**

**SAY:** “Let’s look at some of the words we’ll hear in our storybook.”

| <b><u>SHOW</u><br/>Definition<br/>Picture and<br/>SAY</b> | <b><u>SAY</u> Definition</b>                                           | √ | <b><u>SAY</u> Synonym</b>           | √ | <b><u>SAY</u> Context</b>                                           | √ | <b>X<br/>exposure</b> |
|-----------------------------------------------------------|------------------------------------------------------------------------|---|-------------------------------------|---|---------------------------------------------------------------------|---|-----------------------|
| <b>P 1.</b><br>Tell me what <b>damp</b> means.            | <b>Damp</b> means barely wet or moist.                                 | √ | <b>Damp</b> is like a little soggy. | √ | We put the <b>damp</b> towels on the clothesline to dry in the sun. | √ | X                     |
| <b>Response</b>                                           |                                                                        |   |                                     |   |                                                                     |   |                       |
| <b>P 2.</b><br>Tell me what <b>discovered</b> means.      | <b>Discovered</b> means to have seen something first.                  | √ | <b>Discovered</b> is like found.    | √ | The man climbed to the top of the ship and <b>discovered</b> land.  | √ | X                     |
| <b>Response</b>                                           |                                                                        |   |                                     |   |                                                                     |   |                       |
| <b>P 3.</b><br>Tell me what <b>furnace</b> means.         | <b>Furnace</b> means something used to make heat to warm buildings.    | √ | A <b>furnace</b> is like a heater.  | √ | The <b>furnace</b> is in the basement of our house.                 | √ | X                     |
| <b>Response</b>                                           |                                                                        |   |                                     |   |                                                                     |   |                       |
| <b>P 4.</b><br>Tell me what <b>gloomy</b> means.          | <b>Gloomy</b> means having very little light.                          | √ | <b>Gloomy</b> is like dark.         | √ | The dark, scary forest was <b>gloomy</b> and covered in fog.        | √ | X                     |
| <b>Response</b>                                           |                                                                        |   |                                     |   |                                                                     |   |                       |
| <b>P 5.</b><br>Tell me what <b>swat</b> means.            | <b>Swat</b> means to hit quickly using an open hand or something else. | √ | <b>Swat</b> is like slap.           | √ | The playful cat gave the toy mouse a <b>swat</b> with his paw.      | √ | X                     |
| <b>Response</b>                                           |                                                                        |   |                                     |   |                                                                     |   |                       |
| <b>P 6.</b><br>Tell me what <b>swung</b> means.           | <b>Swung</b> means to have caused to move back and forth.              | √ | <b>Swung</b> is like spun.          | √ | My mom <b>swung</b> me around by my arms at the park.               | √ | X                     |
| <b>Response</b>                                           |                                                                        |   |                                     |   |                                                                     |   |                       |
| <b>Notes on extra exposure:</b>                           |                                                                        |   |                                     |   |                                                                     |   |                       |

**CONTINUE TO NEXT PAGE FOR BOOK READING**

**Book Reading (Text + Synonym + Definition):**

**SAY:** “Let’s read our storybook and listen for those words!”

| <b><u>SHOW</u> Book Picture</b> | <b><u>READ</u> Text</b>                                                                  | √ | <b><u>SAY</u> Synonym</b>           | √ | <b><u>SAY</u> Definition</b>                                           | √ | <b>X exposure</b> |
|---------------------------------|------------------------------------------------------------------------------------------|---|-------------------------------------|---|------------------------------------------------------------------------|---|-------------------|
| <b>Page 1</b>                   | “I just knew, because the cellar was dark and <b>damp</b> and it smelled.”               |   | <b>Damp</b> is like a little soggy. |   | <b>Damp</b> means barely wet or moist.                                 |   |                   |
| <b>Page 6</b>                   | “It was very black and <b>gloomy</b> .”                                                  |   | <b>Gloomy</b> is like dark.         |   | <b>Gloomy</b> means having very little light.                          |   |                   |
| <b>Page 8</b>                   | “It was hiding behind the <b>furnace</b> .”                                              |   | A <b>furnace</b> is like a heater.  |   | <b>Furnace</b> means something used to make heat to warm buildings.    |   |                   |
| <b>Page 11</b>                  | “...and I gave it a <b>swat</b> with the broom. WHAM!”                                   |   | <b>Swat</b> is like slap.           |   | <b>Swat</b> means to hit quickly using an open hand or something else. |   |                   |
| <b>Page 13</b>                  | “I <b>swung</b> the broom again. WHAM!”                                                  |   | <b>Swung</b> is like spun.          |   | <b>Swung</b> means to have caused to move back and forth.              |   |                   |
| <b>Page 23</b>                  | “I was searching for more clues when I <b>discovered</b> the back cellar door was open.” |   | <b>Discovered</b> is like found.    |   | <b>Discovered</b> means to have seen something first.                  |   |                   |
| <b>Notes on extra exposure:</b> |                                                                                          |   |                                     |   |                                                                        |   |                   |

**CONTINUE TO NEXT PAGE FOR REVIEW**

**Review (Naming + Context + Synonym + Definition):**

**SAY** “Let’s think about the different words from our storybook.”

| <b><u>SHOW</u><br/>Context<br/>Picture and<br/><u>SAY</u></b> | <b><u>SAY</u> Context</b>                                                   | √ | <b><u>SAY</u><br/>Synonym</b>       | √ | <b><u>SAY</u> Definition</b>                                           | √ | <b>X<br/>exposure</b> |
|---------------------------------------------------------------|-----------------------------------------------------------------------------|---|-------------------------------------|---|------------------------------------------------------------------------|---|-----------------------|
| <b>R 1.</b><br>What has he done?                              | [Click] The baseball player <b>swung</b> the bat and hit the ball.          |   | <b>Swung</b> is like spun.          |   | <b>Swung</b> means to have caused to move back and forth.              |   |                       |
| <b>Response (transcribe and highlight if questionable)</b>    |                                                                             |   |                                     |   |                                                                        |   |                       |
| <b>R 2.</b><br>What does the woman do?                        | [Click] I wanted to <b>swat</b> the fly so that it would go away.           |   | <b>Swat</b> is like slap.           |   | <b>Swat</b> means to hit quickly using an open hand or something else. |   |                       |
| <b>Response (transcribe and highlight if questionable)</b>    |                                                                             |   |                                     |   |                                                                        |   |                       |
| <b>R 3.</b><br>How is the sky?                                | [Click] The gray and <b>gloomy</b> sky was filled with rain clouds.         |   | <b>Gloomy</b> is like dark.         |   | <b>Gloomy</b> means having very little light.                          |   |                       |
| <b>Response (transcribe and highlight if questionable)</b>    |                                                                             |   |                                     |   |                                                                        |   |                       |
| <b>R 4.</b><br>What’s this?                                   | [Click] In the farm house, Mom saw an old <b>furnace</b> that was very hot. |   | A <b>furnace</b> is like a heater.  |   | <b>Furnace</b> means something used to make heat to warm buildings.    |   |                       |
| <b>Response (transcribe and highlight if questionable)</b>    |                                                                             |   |                                     |   |                                                                        |   |                       |
| <b>R 5.</b><br>What did he do?                                | [Click] The boy <b>discovered</b> a secret pile of candy in the kitchen.    |   | <b>Discovered</b> is like found.    |   | <b>Discovered</b> means to have seen something first.                  |   |                       |
| <b>Response (transcribe and highlight if questionable)</b>    |                                                                             |   |                                     |   |                                                                        |   |                       |
| <b>R 6.</b><br>How are their clothes?                         | [Click] After playing in the water, our clothes were <b>damp</b> .          |   | <b>Damp</b> is like a little soggy. |   | <b>Damp</b> means barely wet or moist.                                 |   |                       |
| <b>Response (transcribe and highlight if questionable)</b>    |                                                                             |   |                                     |   |                                                                        |   |                       |
| <b>Notes on extra exposure:</b>                               |                                                                             |   |                                     |   |                                                                        |   |                       |



Participant Number: \_\_\_\_\_ Examiner: \_\_\_\_\_ Date: \_\_\_\_\_  
 Treatment Session Number: \_\_\_\_\_

Dose = 9; Dose Frequency = 4      Dose Frequency for this Training (circle 1): 1 2 3 4

Videotape Number: \_\_\_\_\_ Start time: \_\_\_\_\_ End time: \_\_\_\_\_ Session Length: \_\_\_\_\_

**Preview (Definition + Synonym + Context):**

**SAY:** “Let’s look at some of the words we’ll hear in our storybook.”

| <b><u>SHOW Definition</u></b><br><b><u>Picture and SAY</u></b> | <b><u>SAY Definition</u></b>                                            | √ | <b><u>SAY Synonym</u></b>          | √ | <b><u>SAY Context</u></b>                                               | √ | <b>X</b><br><b>exposure</b> |
|----------------------------------------------------------------|-------------------------------------------------------------------------|---|------------------------------------|---|-------------------------------------------------------------------------|---|-----------------------------|
| <b>P 1.</b> Tell me what <b>clamor</b> means.                  | <b>Clamor</b> means a loud sound that goes on for some time.            |   | <b>Clamor</b> is like noise.       |   | The dog's barking made a loud <b>clamor</b> that bothered the neighbors |   |                             |
| <b>Response:</b>                                               |                                                                         |   |                                    |   |                                                                         |   |                             |
| <b>P 2.</b> Tell me what <b>grumbling</b> means.               | <b>Grumbling</b> means complaining in a low voice.                      |   | <b>Grumbling</b> is like whining.  |   | The old man was <b>grumbling</b> about the cold snowy weather.          |   |                             |
| <b>Response:</b>                                               |                                                                         |   |                                    |   |                                                                         |   |                             |
| <b>P 3.</b> Tell me what <b>marsh</b> means.                   | <b>Marsh</b> means a low, wet land, often thick with tall grasses.      |   | <b>Marsh</b> is like a swamp.      |   | The boat was stuck in the <b>marsh</b> because it was too muddy.        |   |                             |
| <b>Response:</b>                                               |                                                                         |   |                                    |   |                                                                         |   |                             |
| <b>P 4.</b> Tell me what <b>peering</b> means.                 | <b>Peering</b> means looking hard or closely to see something better.   |   | <b>Peering</b> is like staring.    |   | The man was <b>peering</b> through the window to watch the cars.        |   |                             |
| <b>Response:</b>                                               |                                                                         |   |                                    |   |                                                                         |   |                             |
| <b>P 5.</b> Tell me what <b>racket</b> means.                  | <b>Racket</b> means a loud noise that bothers you.                      |   | <b>Racket</b> is like a big sound. |   | My sister's music made a <b>racket</b> that hurt my ears.               |   |                             |
| <b>Response:</b>                                               |                                                                         |   |                                    |   |                                                                         |   |                             |
| <b>P 6.</b> Tell me what <b>squinting</b> means.               | <b>Squinting</b> means looking at something through partly closed eyes. |   | <b>Squinting</b> is like peeking.  |   | She was <b>squinting</b> at her computer to see the small letters.      |   |                             |
| <b>Response:</b>                                               |                                                                         |   |                                    |   |                                                                         |   |                             |
| <b>Notes on extra exposure:</b>                                |                                                                         |   |                                    |   |                                                                         |   |                             |

**CONTINUE TO NEXT PAGE FOR BOOK READING**

**Book Reading (Text + Synonym + Definition):**

**SAY:** “Let’s read our storybook and listen for those words!”

| <b><u>SHOW</u><br/>Book<br/>Picture</b> | <b><u>READ</u> Text</b>                                                                                | √ | <b><u>SAY</u><br/>Synonym</b>      | √ | <b><u>SAY</u> Definition</b>                                            | √ | <b>X<br/>exposure</b> |
|-----------------------------------------|--------------------------------------------------------------------------------------------------------|---|------------------------------------|---|-------------------------------------------------------------------------|---|-----------------------|
| <b>Page 5</b>                           | -“We can scarcely hear ourselves sing with all that <b>clamor</b> .”                                   |   | <b>Clamor</b> is like noise.       |   | <b>Clamor</b> means a loud sound that goes on for some time.            |   |                       |
| <b>Page 12</b>                          | -“They continued over the hill, the catbirds flying overhead, the bear <b>grumbling</b> along behind.” |   | <b>Grumbling</b> is like whining.  |   | <b>Grumbling</b> means complaining in a low voice.                      |   |                       |
| <b>Page 15</b>                          | -“They came down to a <b>marsh</b> .”                                                                  |   | <b>Marsh</b> is like a swamp.      |   | <b>Marsh</b> means a low, wet land, often thick with tall grasses.      |   |                       |
| <b>Page 16</b>                          | -“They pressed on, following the muskrat, <b>peering</b> between new green shoots.”                    |   | <b>Peering</b> is like staring.    |   | <b>Peering</b> means looking hard or closely to see something better.   |   |                       |
| <b>Page 21</b>                          | -“AH HA!” they cried, <b>squinting</b> at a small spot on the bank.”                                   |   | <b>Squinting</b> is like peeking.  |   | <b>Squinting</b> means looking at something through partly closed eyes. |   |                       |
| <b>Page 21</b>                          | -“How could such a speck of a thing make such a huge <b>racket</b> ?’ asked the bear.”                 |   | <b>Racket</b> is like a big sound. |   | <b>Racket</b> means a loud noise that bothers you.                      |   |                       |
| <b>Notes on extra exposure:</b>         |                                                                                                        |   |                                    |   |                                                                         |   |                       |

**CONTINUE TO NEXT PAGE FOR REVIEW**

**Review (Naming + Context + Synonym + Definition):**

**SAY** “Let’s think about the different words from our storybook.”

| <b><u>SHOW</u><br/>Context<br/>Picture<br/>and SAY</b>     | <b><u>SAY</u> Context</b>                                                                      | √ | <b><u>SAY</u><br/>Synonym</b>      | √ | <b><u>SAY</u> Definition</b>                                            | √ | <b>X<br/>exposure</b> |
|------------------------------------------------------------|------------------------------------------------------------------------------------------------|---|------------------------------------|---|-------------------------------------------------------------------------|---|-----------------------|
| <b>R 1.</b><br>What is he doing with his eyes?             | <b>[Click]</b> He was <b>squinting</b> while reading the paper because it was so small.        |   | <b>Squinting</b> is like peeking.  |   | <b>Squinting</b> means looking at something through partly closed eyes. |   |                       |
| <b>Response (transcribe and highlight if questionable)</b> |                                                                                                |   |                                    |   |                                                                         |   |                       |
| <b>R 2.</b><br>What does she hear?                         | <b>[Click]</b> The teacher asked the class to stop making <b>racket</b> during silent reading. |   | <b>Racket</b> is like a big sound. |   | <b>Racket</b> means a loud noise that bothers you.                      |   |                       |
| <b>Response (transcribe and highlight if questionable)</b> |                                                                                                |   |                                    |   |                                                                         |   |                       |
| <b>R 3.</b><br>What are they doing?                        | <b>[Click]</b> When <b>peering</b> out the window, they saw deer in the field.                 |   | <b>Peering</b> is like staring.    |   | <b>Peering</b> means looking hard or closely to see something better.   |   |                       |
| <b>Response (transcribe and highlight if questionable)</b> |                                                                                                |   |                                    |   |                                                                         |   |                       |
| <b>R 4.</b><br>Where are the animals?                      | <b>[Click]</b> Ducks and beavers live in a <b>marsh</b> because they like the water.           |   | <b>Marsh</b> is like a swamp.      |   | <b>Marsh</b> means a low, wet land, often thick with tall grasses.      |   |                       |
| <b>Response (transcribe and highlight if questionable)</b> |                                                                                                |   |                                    |   |                                                                         |   |                       |
| <b>R 5.</b><br>What is he doing?                           | <b>[Click]</b> He was <b>grumbling</b> because his mother made him clean his room.             |   | <b>Grumbling</b> is like whining.  |   | <b>Grumbling</b> means complaining in a low voice.                      |   |                       |
| <b>Response (transcribe and highlight if questionable)</b> |                                                                                                |   |                                    |   |                                                                         |   |                       |
| <b>R 6.</b><br>What were the people making?                | <b>[Click]</b> I covered my ears because the people were making a <b>clamor</b> .              |   | <b>Clamor</b> is like noise.       |   | <b>Clamor</b> means a loud sound that goes on for some time.            |   |                       |
| <b>Response (transcribe and highlight if questionable)</b> |                                                                                                |   |                                    |   |                                                                         |   |                       |
| <b>Notes on extra exposure:</b>                            |                                                                                                |   |                                    |   |                                                                         |   |                       |



**TREATMENT INTENSITY CONDITION**  
**36 9 dose X 4 dose frequency**  
**Set B = Treated Words**

## KU Word and Sound Learning Lab



Kindergarten Children Acquiring Words through STORYbook Reading

### TREATMENT CHECKLIST

#### SUBJECT INFORMATION

KAW Number: \_\_\_\_\_

Initials: \_\_\_\_\_

Preliminary Evaluation Dates: \_\_\_\_\_ Examiner(s): \_\_\_\_\_

Pre-treatment Testing Dates: \_\_\_\_\_ Examiner(s) (blind): \_\_\_\_\_

#### INTENSITY CONDITION:

**36 9-4 (each book 4 times)**      6-6 (each book 6 times)      4-9 (each book 9 times)

VERSION CONDITION: \_\_\_\_\_ VERSION A      **VERSION B**

| Treatment                               | Control                                |
|-----------------------------------------|----------------------------------------|
| Book 1: Caterpillar that Roared         | Book 1: Imogene's Antlers              |
| Book 2: What do you do with a Kangaroo? | Book 2: Otis                           |
| Book 3: Bear Under the Stairs           | Book 3: Shy Charles                    |
| Book 4: Book! Book! Book!               | Book 4: Harry and the Terrible Whatzit |
| Book 5: Swimmy                          | Book 5: Possum and the Peeper          |
|                                         |                                        |

#### TREATMENT PROVIDER (LIST ALL IF MORE THAN ONE):

#### SESSION SCHEDULE (2-3 SESSIONS PER WEEK)

#### INTENSITY 36: DOSE 9 (2 SESSIONS PER WEEK = 5 WEEKS OR 3 SESSIONS PER WEEK = 3 ½ WEEKS)

|                                                                                        |                                                                                  |
|----------------------------------------------------------------------------------------|----------------------------------------------------------------------------------|
| <b>Session 1.1:</b>                                                                    | <b>Session 1.2:</b>                                                              |
| Book 1 (1st): Caterpillar that Roared<br>Book 2 (1st): What do you do with a Kangaroo? | Book 3 (1st): Bear Under the Stairs<br>Book 4 (1st): Book! Book! Book!           |
| <b>Session 1.3:</b>                                                                    | <b>Session 1.4:</b>                                                              |
| Book 5 (1st): Swimmy<br>Book 1 (2nd): Caterpillar that Roared                          | Book 2 (2nd): What do you do with a Kangaroo?<br>Book 4 (2nd): Book! Book! Book! |
| <b>Session 1.5:</b>                                                                    | <b>Session 1.6:</b>                                                              |
| Book 3 (2nd): Bear Under the Stairs<br>Book 5 (2nd): Swimmy                            | Book 1 (3rd): Caterpillar that Roared<br>Book 4 (3rd): Book! Book! Book!         |

| <b>Session 1.7:</b>                                                   | <b>Session 1.8:</b>                                                          |
|-----------------------------------------------------------------------|------------------------------------------------------------------------------|
| Book 2 (3rd): What do you do with a Kangaroo?<br>Book 5 (3rd): Swimmy | Book 3 (3rd): Bear Under the Stairs<br>Book 1 (4th): Caterpillar that Roared |

| <b>Session 1.9:</b>                                                              | <b>Session 1.10:</b>                                        |
|----------------------------------------------------------------------------------|-------------------------------------------------------------|
| Book 4 (4th): Book! Book! Book!<br>Book 2 (4th): What do you do with a Kangaroo? | Book 5 (4th): Swimmy<br>Book 3 (4th): Bear Under the Stairs |

Post-treatment Testing Dates: \_\_\_\_\_ Examiner (blind): \_\_\_\_\_

Participant Number: \_\_\_\_\_ Examiner: \_\_\_\_\_ Date: \_\_\_\_\_  
 Treatment Session Number: \_\_\_\_\_  
 Dose = 9; Dose Frequency = 4 Dose Frequency for this Training (circle 1): 1 2 3 4

Videotape Number: \_\_\_\_\_ Start time: \_\_\_\_\_ End time: \_\_\_\_\_ Session Length: \_\_\_\_\_

**Preview (Definition + Synonym + Context):**

**SAY:** “Let’s look at some of the words we’ll hear in our storybook.”

| <b><u>SHOW</u> Definition<br/>Picture and <u>SAY</u></b> | <b><u>SAY</u> Definition</b>                                       | ✓ | <b><u>SAY</u><br/>Synonym</b>        | ✓ | <b><u>SAY</u><br/>Context</b>                                                | ✓ | <b>X<br/>exposure</b> |
|----------------------------------------------------------|--------------------------------------------------------------------|---|--------------------------------------|---|------------------------------------------------------------------------------|---|-----------------------|
| <b>P 1.</b><br>Tell me what <b>gaze</b> means.           | <b>Gaze</b> means to look at something for a long time.            |   | <b>Gaze</b> is like stare.           |   | He went out at night to <b>gaze</b> at the stars.                            |   |                       |
| <b>Response</b>                                          |                                                                    |   |                                      |   |                                                                              |   |                       |
| <b>P 2.</b><br>Tell me what <b>horrified</b> means.      | <b>Horrified</b> means a feeling of being scared.                  |   | <b>Horrified</b> is like frightened. |   | He was <b>horrified</b> because he heard a scary noise in his room at night. |   |                       |
| <b>Response</b>                                          |                                                                    |   |                                      |   |                                                                              |   |                       |
| <b>P 3.</b><br>Tell me what <b>ripples</b> means.        | <b>Ripples</b> means small waves made from moving.                 |   | <b>Ripples</b> is like bumpy water.  |   | The leaf touched the water and made tiny <b>ripples</b> .                    |   |                       |
| <b>Response</b>                                          |                                                                    |   |                                      |   |                                                                              |   |                       |
| <b>P 4.</b><br>Tell me what <b>snuggled</b> means.       | <b>Snuggled</b> means to lay in a comfortable way next to someone. |   | <b>Snuggled</b> is like cuddled.     |   | My teddy bear and I <b>snuggled</b> with my grandpa.                         |   |                       |
| <b>Response</b>                                          |                                                                    |   |                                      |   |                                                                              |   |                       |
| <b>P 5.</b><br>Tell me what <b>surface</b> means.        | <b>Surface</b> means the outside part of something.                |   | <b>Surface</b> is like top.          |   | The <b>surface</b> of the moon has rocks and black spots.                    |   |                       |
| <b>Response</b>                                          |                                                                    |   |                                      |   |                                                                              |   |                       |
| <b>P 6.</b><br>Tell me what <b>twitch</b> means.         | <b>Twitch</b> means to move quickly and suddenly.                  |   | <b>Twitch</b> is like shake.         |   | The smell of carrots made the bunny's nose <b>twitch</b> .                   |   |                       |
| <b>Response</b>                                          |                                                                    |   |                                      |   |                                                                              |   |                       |
| <b>Notes on extra exposure:</b>                          |                                                                    |   |                                      |   |                                                                              |   |                       |

**CONTINUE TO NEXT PAGE FOR BOOK READING**

**Book Reading (Text + Synonym + Definition):**

**SAY:** “Let’s read our storybook and listen for those words!”

| <b><u>SHOW</u><br/>Book<br/>Picture</b> | <b><u>READ</u> Text</b>                                                                                            | √ | <b><u>SAY</u><br/>Synonym</b>        | √ | <b><u>SAY</u> Definition</b>                                       | √ | <b>X<br/>exposure</b> |
|-----------------------------------------|--------------------------------------------------------------------------------------------------------------------|---|--------------------------------------|---|--------------------------------------------------------------------|---|-----------------------|
| <b>Page 2</b>                           | “Every morning when he woke up he would <b>gaze</b> at himself in the mirror.”                                     |   | <b>Gaze</b> is like stare.           |   | <b>Gaze</b> means to look at something for a long time.            |   |                       |
| <b>Page 3</b>                           | “He would pull himself up as tall as he could, toss his imaginary mane, and <b>twitch</b> his imaginary whiskers.” |   | <b>Twitch</b> is like shake.         |   | <b>Twitch</b> means to move quickly and suddenly.                  |   |                       |
| <b>Page 17</b>                          | “Ferdinand the fish was preparing his dinner below the <b>surface</b> .”                                           |   | <b>Surface</b> is like top.          |   | <b>Surface</b> means the outside part of something.                |   |                       |
| <b>Page 17</b>                          | “Ferdinand saw a huge and fearsome creature through the <b>ripples</b> .”                                          |   | <b>Ripples</b> is like bumpy water.  |   | <b>Ripples</b> means small waves made from moving.                 |   |                       |
| <b>Page 21</b>                          | “Hugo was <b>horrified</b> .”                                                                                      |   | <b>Horrified</b> is like frightened. |   | <b>Horrified</b> means a feeling of being scared.                  |   |                       |
| <b>Page 24</b>                          | “That night, Hugo <b>snuggled</b> down to sleep.”                                                                  |   | <b>Snuggled</b> is like cuddled.     |   | <b>Snuggled</b> means to lay in a comfortable way next to someone. |   |                       |

**Notes on extra exposure:**

**CONTINUE TO NEXT PAGE FOR REVIEW**



**Review (Naming + Context + Synonym + Definition):**

**SAY** “Let’s think about the different words from our storybook.”

| <b><u>SHOW</u><br/>Context<br/>Picture and<br/>SAY</b>     | <b><u>SAY</u> Context</b>                                                                  | √ | <b><u>SAY</u> Synonym</b>            | √ | <b><u>SAY</u> Definition</b>                                       | √ | <b>X<br/>exposure</b> |
|------------------------------------------------------------|--------------------------------------------------------------------------------------------|---|--------------------------------------|---|--------------------------------------------------------------------|---|-----------------------|
| <b>R 1.</b><br>What does the cow’s tail do?                | <b>[Click]</b> The cow needed to <b>twitch</b> his tail to get the fly off his back.       |   | <b>Twitch</b> is like shake.         |   | <b>Twitch</b> means to move quickly and suddenly.                  |   |                       |
| <b>Response (transcribe and highlight if questionable)</b> |                                                                                            |   |                                      |   |                                                                    |   |                       |
| <b>R 2.</b><br>What part of the table does he paint?       | <b>[Click]</b> The man painted the <b>surface</b> of the picnic table brown.               |   | <b>Surface</b> is like top.          |   | <b>Surface</b> means the outside part of something.                |   |                       |
| <b>Response (transcribe and highlight if questionable)</b> |                                                                                            |   |                                      |   |                                                                    |   |                       |
| <b>R 3.</b><br>What did the people do?                     | <b>[Click]</b> When I watched the movie, I <b>snuggled</b> next to my mom.                 |   | <b>Snuggled</b> is like cuddled      |   | <b>Snuggled</b> means to lay in a comfortable way next to someone. |   |                       |
| <b>Response (transcribe and highlight if questionable)</b> |                                                                                            |   |                                      |   |                                                                    |   |                       |
| <b>R 4.</b><br>What are the bumps on the water?            | <b>[Click]</b> My toes made small <b>ripples</b> in the swimming pool.                     |   | <b>Ripples</b> is like bumpy water.  |   | <b>Ripples</b> means small waves made from moving.                 |   |                       |
| <b>Response (transcribe and highlight if questionable)</b> |                                                                                            |   |                                      |   |                                                                    |   |                       |
| <b>R 5.</b><br>How did he feel?                            | <b>[Click]</b> After going through the haunted house, he was <b>horrified</b> of ghosts.   |   | <b>Horrified</b> is like frightened. |   | <b>Horrified</b> means a feeling of being scared.                  |   |                       |
| <b>Response (transcribe and highlight if questionable)</b> |                                                                                            |   |                                      |   |                                                                    |   |                       |
| <b>R 6.</b><br>What does he do?                            | <b>[Click]</b> The little boy likes to <b>gaze</b> at the TV when his favorite show is on. |   | <b>Gaze</b> is like stare.           |   | <b>Gaze</b> means to look at something for a long time.            |   |                       |
| <b>Response (transcribe and highlight if questionable)</b> |                                                                                            |   |                                      |   |                                                                    |   |                       |
| <b>Notes on extra exposure:</b>                            |                                                                                            |   |                                      |   |                                                                    |   |                       |

Participant Number: \_\_\_\_\_ Examiner: \_\_\_\_\_ Date: \_\_\_\_\_

Treatment Session Number: \_\_\_\_\_

Dose = 9; Dose Frequency = 4 Dose Frequency for this Training (circle 1): 1 2 3 4

Preview (Definition + Synonym + Context):

|                         |                   |                 |                       |
|-------------------------|-------------------|-----------------|-----------------------|
| Videotape Number: _____ | Start time: _____ | End time: _____ | Session Length: _____ |
|-------------------------|-------------------|-----------------|-----------------------|

**SAY:** "Let's look at some of the words we'll hear in our storybook."

| <b>SHOW</b><br>Definition<br>Picture and<br>SAY    | <b>SAY</b> Definition                                            |   | <b>SAY</b><br>Synonym            |   | <b>SAY</b><br>Context                                                          |  | <b>X</b><br>exposure |
|----------------------------------------------------|------------------------------------------------------------------|---|----------------------------------|---|--------------------------------------------------------------------------------|--|----------------------|
| <b>P 1.</b><br>Tell me what <b>flashing</b> means. | <b>Flashing</b> means a sudden bright light that goes away fast. | √ | <b>Flashing</b> is like blazing. | √ | The lights on the police car were <b>flashing</b> , so we pulled our car over. |  |                      |
| <b>Response</b>                                    |                                                                  |   |                                  |   |                                                                                |  |                      |
| <b>P 2.</b><br>Tell me what <b>frayed</b> means.   | <b>Frayed</b> means to have rubbed thin or come apart.           |   | <b>Frayed</b> is like torn.      |   | The old wire was <b>frayed</b> because I bought it a long time ago.            |  |                      |
| <b>Response</b>                                    |                                                                  |   |                                  |   |                                                                                |  |                      |
| <b>P 3.</b><br>Tell me what <b>smooth</b> means.   | <b>Smooth</b> means flat and not rough.                          |   | <b>Smooth</b> is like even.      |   | The glass was cool and <b>smooth</b> on my fingers.                            |  |                      |
| <b>Response</b>                                    |                                                                  |   |                                  |   |                                                                                |  |                      |
| <b>P 4.</b><br>Tell me what <b>stale</b> means.    | <b>Stale</b> means not fresh or not tasting good.                |   | <b>Stale</b> is like old.        |   | The bread was <b>stale</b> and had green mold on it.                           |  |                      |
| <b>Response</b>                                    |                                                                  |   |                                  |   |                                                                                |  |                      |
| <b>P 5.</b><br>Tell me what <b>tailor</b> means.   | <b>Tailor</b> means a person who makes or fixes clothes.         |   | <b>Tailor</b> is like sew-er.    |   | The <b>tailor</b> measured the coat so he could make the sleeves.              |  |                      |
| <b>Response</b>                                    |                                                                  |   |                                  |   |                                                                                |  |                      |
| <b>P 6.</b><br>Tell me what <b>worn</b> means.     | <b>Worn</b> means to become thin or torn from use.               |   | <b>Worn</b> is like damaged.     |   | My socks are <b>worn</b> because I walk on the street with them.               |  |                      |
| <b>Response</b>                                    |                                                                  |   |                                  |   |                                                                                |  |                      |
| <b>Notes on extra exposure:</b>                    |                                                                  |   |                                  |   |                                                                                |  |                      |

**CONTINUE TO NEXT PAGE FOR BOOK READING**

**Book Reading (Text + Synonym + Definition):**

**SAY:** “Let’s read our storybook and listen for those words!”

| <b><u>SHOW</u><br/>Book<br/>Picture</b> | <b><u>READ</u> Text</b>                                                                                                                          | √ | <b><u>SAY</u><br/>Synonym</b>    | √ | <b><u>SAY</u> Definition</b>                                     | √ | <b>X</b><br><br>exposure |
|-----------------------------------------|--------------------------------------------------------------------------------------------------------------------------------------------------|---|----------------------------------|---|------------------------------------------------------------------|---|--------------------------|
| <b>Page 1</b>                           | “I never sleep on wrinkled sheets, so change them now and make them <b>smooth</b> .”                                                             |   | <b>Smooth</b> is like even.      |   | <b>Smooth</b> means flat and not rough.                          |   |                          |
| <b>Page 4</b>                           | “He says to you, ‘This toothpaste you use is much too sweet, and your toothbrush, I’m sorry to say, is all <b>worn</b> .’”                       |   | <b>Worn</b> is like damaged.     |   | <b>Worn</b> means to become thin or torn from use.               |   |                          |
| <b>Page 10</b>                          | “The knees are snug, and the button is gone, and the cuffs are <b>frayed</b> .”                                                                  |   | <b>Frayed</b> is like torn.      |   | <b>Frayed</b> means to have rubbed thin or come apart.           |   |                          |
| <b>Page 10</b>                          | “For goodness sake, the seam is ripped—so send these right off to the <b>tailor</b> .”                                                           |   | <b>Tailor</b> is like sew-er.    |   | <b>Tailor</b> means a person who makes or fixes clothes.         |   |                          |
| <b>Page 13</b>                          | “He says to you, ‘This cereal is <b>stale</b> .’”                                                                                                |   | <b>Stale</b> is like old.        |   | <b>Stale</b> means not fresh or not tasting good.                |   |                          |
| <b>Page 21</b>                          | “What do you do if you want to go riding but there on your red-painted tricycle seat sits a grown Bengal Tiger with <b>flashing</b> green eyes?” |   | <b>Flashing</b> is like blazing. |   | <b>Flashing</b> means a sudden bright light that goes away fast. |   |                          |

**Notes on extra exposure:**

**CONTINUE TO NEXT PAGE FOR REVIEW**

**Review (Naming + Context + Synonym + Definition):**

**SAY** “Let’s think about the different words from our storybook.”

| <b>SHOW<br/>Context<br/>Picture and<br/>SAY</b>            | <b>SAY Context</b>                                                                       | ✓ | <b>SAY<br/>Synonym</b>           | ✓ | <b>SAY Definition</b>                                            | ✓ | <b>X<br/>exposure</b> |
|------------------------------------------------------------|------------------------------------------------------------------------------------------|---|----------------------------------|---|------------------------------------------------------------------|---|-----------------------|
| <b>R 1.</b><br>How does the blanket look?                  | <b>[Click]</b> The blanket I slept with every night was <b>worn</b> .                    |   | <b>Worn</b> is like damaged.     |   | <b>Worn</b> means to become thin or torn from use.               |   |                       |
| <b>Response (transcribe and highlight if questionable)</b> |                                                                                          |   |                                  |   |                                                                  |   |                       |
| <b>R 2.</b><br>Who is she?                                 | <b>[Click]</b> The <b>tailor</b> fixed my dress that had a big hole.                     |   | <b>Tailor</b> is like sew-er.    |   | <b>Tailor</b> means a person who makes or fixes clothes.         |   |                       |
| <b>Response (transcribe and highlight if questionable)</b> |                                                                                          |   |                                  |   |                                                                  |   |                       |
| <b>R 3.</b><br>How do the chips taste?                     | <b>[Click]</b> The chips were <b>stale</b> because the bag was left open for three days. |   | <b>Stale</b> is like old.        |   | <b>Stale</b> means not fresh or not tasting good.                |   |                       |
| <b>Response (transcribe and highlight if questionable)</b> |                                                                                          |   |                                  |   |                                                                  |   |                       |
| <b>R 4.</b><br>How does his skin feel?                     | <b>[Click]</b> My dad's face was <b>smooth</b> because he shaved off his beard.          |   | <b>Smooth</b> is like even.      |   | <b>Smooth</b> means flat and not rough.                          |   |                       |
| <b>Response (transcribe and highlight if questionable)</b> |                                                                                          |   |                                  |   |                                                                  |   |                       |
| <b>R 5.</b><br>How does the rope look?                     | <b>[Click]</b> The rope was <b>frayed</b> because many kids climbed it every day.        |   | <b>Frayed</b> is like torn.      |   | <b>Frayed</b> means to have rubbed thin or come apart.           |   |                       |
| <b>Response (transcribe and highlight if questionable)</b> |                                                                                          |   |                                  |   |                                                                  |   |                       |
| <b>R 6.</b><br>What is the lightning doing?                | <b>[Click]</b> The <b>flashing</b> lightning lights up the summer night sky.             |   | <b>Flashing</b> is like blazing. |   | <b>Flashing</b> means a sudden bright light that goes away fast. |   |                       |
| <b>Response (transcribe and highlight if questionable)</b> |                                                                                          |   |                                  |   |                                                                  |   |                       |
| <b>Notes on extra exposure:</b>                            |                                                                                          |   |                                  |   |                                                                  |   |                       |

Participant Number: \_\_\_\_\_ Examiner: \_\_\_\_\_ Date: \_\_\_\_\_

Treatment Session Number: \_\_\_\_\_

Dose = 9; Dose Frequency = 4

Dose Frequency for this Training (circle 1): 1 2 3 4

Videotape Number: \_\_\_\_\_ Start time: \_\_\_\_\_ End time: \_\_\_\_\_ Session Length: \_\_\_\_\_

**Preview (Definition + Synonym + Context):****SAY:** "Let's look at some of the words we'll hear in our storybook."

| <b><u>SHOW</u> Definition<br/>Picture and <u>SAY</u></b> | <b><u>SAY</u> Definition</b>                                       | √ | <b><u>SAY</u><br/>Synonym</b>               | √ | <b><u>SAY</u> Context</b>                                                               | √ | <b>X<br/>exposure</b> |
|----------------------------------------------------------|--------------------------------------------------------------------|---|---------------------------------------------|---|-----------------------------------------------------------------------------------------|---|-----------------------|
| <b>P 1.</b><br>Tell me what <b><i>awful</i></b> means.   | <b><i>Awful</i></b> means something that is very terrible.         |   | <b><i>Awful</i></b> is like bad.            |   | Her cup of coffee was cold and tasted <b><i>awful</i></b> .                             |   |                       |
| <b>Response</b>                                          |                                                                    |   |                                             |   |                                                                                         |   |                       |
| <b>P 2.</b><br>Tell me what <b><i>crept</i></b> means.   | <b><i>Crept</i></b> means to have moved slowly and quietly.        |   | <b><i>Crept</i></b> is like sneaked.        |   | The fox <b><i>crept</i></b> through the barn quietly so he could catch a chicken.       |   |                       |
| <b>Response</b>                                          |                                                                    |   |                                             |   |                                                                                         |   |                       |
| <b>P 3.</b><br>Tell me what <b><i>decided</i></b> means. | <b><i>Decided</i></b> means to make up one's mind.                 |   | <b><i>Decided</i></b> is like chose.        |   | The man looked both ways and <b><i>decided</i></b> which way to go.                     |   |                       |
| <b>Response</b>                                          |                                                                    |   |                                             |   |                                                                                         |   |                       |
| <b>P 4.</b><br>Tell me what <b><i>haddock</i></b> means. | <b><i>Haddock</i></b> means a fish that can be eaten as food.      |   | <b><i>Haddock</i></b> is like fish.         |   | The man loved fish, so he ordered a yummy <b><i>haddock</i></b> .                       |   |                       |
| <b>Response</b>                                          |                                                                    |   |                                             |   |                                                                                         |   |                       |
| <b>P 5.</b><br>Tell me what <b><i>noticed</i></b> means. | <b><i>Noticed</i></b> means to look or pay attention to something. |   | <b><i>Noticed</i></b> is like recognized.   |   | The kids <b><i>noticed</i></b> the bright fireworks in the late night sky.              |   |                       |
| <b>Response</b>                                          |                                                                    |   |                                             |   |                                                                                         |   |                       |
| <b>P 6.</b><br>Tell me what <b><i>tight</i></b> means.   | <b><i>Tight</i></b> means to hold strongly in place.               |   | <b><i>Tight</i></b> is like close together. |   | She had to push on her suitcase because it was packed <b><i>tight</i></b> with clothes. |   |                       |
| <b>Response</b>                                          |                                                                    |   |                                             |   |                                                                                         |   |                       |
| <b>Notes on extra exposure:</b>                          |                                                                    |   |                                             |   |                                                                                         |   |                       |

**CONTINUE TO NEXT PAGE FOR BOOK READING**

**Book Reading (Text + Synonym + Definition):****SAY:** “Let’s read our storybook and listen for those words!”

| <b><u>SHOW</u><br/>Book<br/>Picture</b> | <b><u>READ</u> Text</b>                                                              | √ | <b><u>SAY</u> Synonym</b>            | √ | <b><u>SAY</u> Definition</b>                                | √ | <b>X</b><br>exposure |
|-----------------------------------------|--------------------------------------------------------------------------------------|---|--------------------------------------|---|-------------------------------------------------------------|---|----------------------|
| <b>Page 7</b>                           | “William <b>crept</b> down the hall.”                                                |   | <b>Crept</b> is like sneaked         |   | <b>Crept</b> means to have moved slowly and quietly.        |   |                      |
| <b>Page 9</b>                           | “William had kept his eyes shut <b>tight</b> .”                                      |   | <b>Tight</b> is like close together. |   | <b>Tight</b> means to hold strongly in place.               |   |                      |
| <b>Page 16</b>                          | “He fed it hazelnuts, <b>haddock</b> , and honey.”                                   |   | <b>Haddock</b> is like fish.         |   | <b>Haddock</b> means a fish that can be eaten as food.      |   |                      |
| <b>Page 18</b>                          | “The smell got stronger and stronger until William’s mom <b>noticed</b> it.”         |   | <b>Noticed</b> is like recognized.   |   | <b>Noticed</b> means to look or pay attention to something. |   |                      |
| <b>Page 18</b>                          | “She said, ‘What’s that <b>awful</b> smell!’”                                        |   | <b>Awful</b> is like bad.            |   | <b>Awful</b> means something that is very terrible.         |   |                      |
| <b>Page 21</b>                          | “Then William and Mom <b>decided</b> to scare the bear that lived under the stairs.” |   | <b>Decided</b> is like chose.        |   | <b>Decided</b> means to make up one’s mind.                 |   |                      |

**Notes on extra exposure:****CONTINUE TO NEXT PAGE FOR REVIEW**

**Review (Naming + Context + Synonym + Definition):****SAY** “Let’s think about the different words from our storybook.”

| <b>SHOW<br/>Context<br/>Picture<br/>and SAY</b>            | <b>SAY Context</b>                                                           | √ | <b>SAY Synonym</b>                   | √ | <b>SAY Definition</b>                                       | √ | <b>X<br/>exposure</b> |
|------------------------------------------------------------|------------------------------------------------------------------------------|---|--------------------------------------|---|-------------------------------------------------------------|---|-----------------------|
| <b>R 1.</b><br>How is she holding the ball?                | [Click] She held her ball <b>tight</b> so she wouldn’t lose it at the beach. |   | <b>Tight</b> is like close together. |   | <b>Tight</b> means to hold closely in place.                |   |                       |
| <b>Response (transcribe and highlight if questionable)</b> |                                                                              |   |                                      |   |                                                             |   |                       |
| <b>R 2.</b><br>What did her friends do?                    | [Click] Her friends <b>noticed</b> that she was wearing new glasses.         |   | <b>Noticed</b> is like recognized.   |   | <b>Noticed</b> means to look or pay attention to something. |   |                       |
| <b>Response (transcribe and highlight if questionable)</b> |                                                                              |   |                                      |   |                                                             |   |                       |
| <b>R 3.</b><br>What’s this?<br>[Point to fish]             | [Click] Yesterday, I went fishing with my dad and caught a <b>haddock</b> .  |   | <b>Haddock</b> is like fish.         |   | <b>Haddock</b> means a fish that can be eaten as food.      |   |                       |
| <b>Response (transcribe and highlight if questionable)</b> |                                                                              |   |                                      |   |                                                             |   |                       |
| <b>R 4.</b><br>What did he do?                             | [Click] The boy <b>decided</b> to play with the yellow cup.                  |   | <b>Decided</b> is like chose.        |   | <b>Decided</b> means to make up one’s mind.                 |   |                       |
| <b>Response (transcribe and highlight if questionable)</b> |                                                                              |   |                                      |   |                                                             |   |                       |
| <b>R 5.</b><br>What did the girl do?                       | [Click] My sister <b>crept</b> up behind my dad and made him laugh.          |   | <b>Crept</b> is like sneaked         |   | <b>Crept</b> means to have moved slowly and quietly.        |   |                       |
| <b>Response (transcribe and highlight if questionable)</b> |                                                                              |   |                                      |   |                                                             |   |                       |
| <b>R 6.</b><br>How does the girl feel?                     | [Click] I felt <b>awful</b> so my mom gave me a hug.                         |   | <b>Awful</b> is like bad.            |   | <b>Awful</b> means something that is very terrible.         |   |                       |
| <b>Response (transcribe and highlight if questionable)</b> |                                                                              |   |                                      |   |                                                             |   |                       |
| <b>Notes on extra exposure:</b>                            |                                                                              |   |                                      |   |                                                             |   |                       |

Participant Number \_\_\_\_\_ Examiner: \_\_\_\_\_ Date: \_\_\_\_\_

Treatment Session Number: \_\_\_\_\_

Dose = 9; Dose Frequency = 4

Dose Frequency for this Training (circle 1): 1 2 3 4

Videotape Number: \_\_\_\_\_ Start time: \_\_\_\_\_ End time: \_\_\_\_\_ Session Length: \_\_\_\_\_

**Preview (Definition + Synonym + Context):****SAY:** "Let's look at some of the words we'll hear in our storybook."

| <b><u>SHOW</u> Definition<br/>Picture and <u>SAY</u></b>  | <b><u>SAY</u> Definition</b>                                                | √ | <b><u>SAY</u><br/>Synonym</b>              | √ | <b><u>SAY</u> Context</b>                                                       | √ | <b>X<br/>exposure</b> |
|-----------------------------------------------------------|-----------------------------------------------------------------------------|---|--------------------------------------------|---|---------------------------------------------------------------------------------|---|-----------------------|
| <b>P 1.</b><br>Tell me what <b><i>gathered</i></b> means. | <b><i>Gathered</i></b> means to have brought together in one place.         |   | <b><i>Gathered</i></b> is like collected.  |   | The team <b><i>gathered</i></b> in a circle to talk about the soccer game.      |   |                       |
| <b>Response</b>                                           |                                                                             |   |                                            |   |                                                                                 |   |                       |
| <b>P 2.</b><br>Tell me what <b><i>heaved</i></b> means.   | <b><i>Heaved</i></b> means to do something with great effort.               |   | <b><i>Heaved</i></b> is like lifted.       |   | The man <b><i>heaved</i></b> the heavy bar to exercise his arms.                |   |                       |
| <b>Response</b>                                           |                                                                             |   |                                            |   |                                                                                 |   |                       |
| <b>P 3.</b><br>Tell me what <b><i>pouted</i></b> means.   | <b><i>Pouted</i></b> means to look upset by pushing out the lips.           |   | <b><i>Pouted</i></b> is like frowned.      |   | The baby <b><i>pouted</i></b> because she knocked her new toy off of her chair. |   |                       |
| <b>Response</b>                                           |                                                                             |   |                                            |   |                                                                                 |   |                       |
| <b>P 4.</b><br>Tell me what <b><i>ruffle</i></b> means.   | <b><i>Ruffle</i></b> means to move something that is even to make it messy. |   | <b><i>Ruffle</i></b> is like disturb.      |   | The bird will <b><i>ruffle</i></b> his feathers to cool off his body.           |   |                       |
| <b>Response</b>                                           |                                                                             |   |                                            |   |                                                                                 |   |                       |
| <b>P 5.</b><br>Tell me what <b><i>squawked</i></b> means. | <b><i>Squawked</i></b> means to say loudly you don't like something.        |   | <b><i>Squawked</i></b> is like complained. |   | The bird <b><i>squawked</i></b> because he wanted more food to eat.             |   |                       |
| <b>Response</b>                                           |                                                                             |   |                                            |   |                                                                                 |   |                       |
| <b>P 6.</b><br>Tell me what <b><i>whinnied</i></b> means. | <b><i>Whinnied</i></b> means to make a gentle sound, usually by a horse.    |   | <b><i>Whinnied</i></b> is like neigh.      |   | The brown horse <b><i>whinnied</i></b> when I went to his pen                   |   |                       |
| <b>Response</b>                                           |                                                                             |   |                                            |   |                                                                                 |   |                       |
| <b>Notes on extra exposure:</b>                           |                                                                             |   |                                            |   |                                                                                 |   |                       |

**CONTINUE TO NEXT PAGE FOR BOOK READING**



**Book Reading (Text + Synonym + Definition):****SAY:** “Let’s read our storybook and listen for those words!”

| <b><i>SHOW</i></b><br><b><i>Book</i></b><br><b><i>Picture</i></b> | <b><i>READ</i></b> Text                                                                                                                                        | √ | <b><i>SAY</i></b> Synonym           | √ | <b><i>SAY</i></b> Definition                                         | √ | <b>X</b><br>exposure |
|-------------------------------------------------------------------|----------------------------------------------------------------------------------------------------------------------------------------------------------------|---|-------------------------------------|---|----------------------------------------------------------------------|---|----------------------|
| <b>Page 4</b>                                                     | “...no one to scratch behind their ears or <b>ruffle</b> their feathers.”                                                                                      |   | <b>Ruffle</b> is like disturb.      |   | <b>Ruffle</b> means to move something that is even to make it messy. |   |                      |
| <b>Page 6</b>                                                     | The pig <b>pouted</b> .                                                                                                                                        |   | <b>Pouted</b> is like frowned.      |   | <b>Pouted</b> means to look upset by pushing out the lips.           |   |                      |
| <b>Page 6</b>                                                     | “...the hen <b>heaved</b> a sigh...”                                                                                                                           |   | <b>Heaved</b> is like lifted.       |   | <b>Heaved</b> means to do something with great effort.               |   |                      |
| <b>Page 7</b>                                                     | “Long about noon, with the sun high above the barnyard, the hen stood up. ‘I’m bored! And I’m heading to town to find something to do!’ she <b>squawked</b> .” |   | <b>Squawked</b> is like complained. |   | <b>Squawked</b> means to say loudly you don’t like something.        |   |                      |
| <b>Page 9</b>                                                     | “Neigh! Neigh!’ <b>whinnied</b> the horse.”                                                                                                                    |   | <b>Whinnied</b> is like neigh.      |   | <b>Whinnied</b> means to make a gentle sound, usually by a horse.    |   |                      |
| <b>Page 24</b>                                                    | “Back at the farm, the horse, the cow, the goat, the pig, the duck, and the hen <b>gathered</b> around the books.”                                             |   | <b>Gathered</b> is like collected.  |   | <b>Gathered</b> means to have brought together in one place.         |   |                      |
| <b>Notes on extra review:</b>                                     |                                                                                                                                                                |   |                                     |   |                                                                      |   |                      |

**CONTINUE TO NEXT PAGE FOR REVIEW**

**Review (Naming + Context + Synonym + Definition):****SAY** “Let’s think about the different words from our storybook.”

| <b><u>SHOW</u><br/>Context<br/>Picture and<br/><u>SAY</u></b> | <b><u>SAY</u> Context</b>                                                              | √ | <b><u>SAY</u> Synonym</b>           | √ | <b><u>SAY</u> Definition</b>                                         | √ | <b>X<br/>exposure</b> |
|---------------------------------------------------------------|----------------------------------------------------------------------------------------|---|-------------------------------------|---|----------------------------------------------------------------------|---|-----------------------|
| <b>R 1.</b><br>What did the horse do?                         | <b>[Click]</b> The big white horse <b>whinnied</b> when I pet his head.                |   | <b>Whinnied</b> is like neigh.      |   | <b>Whinnied</b> means to make a gentle sound, usually by a horse.    |   |                       |
| <b>Response (transcribe and highlight if questionable)</b>    |                                                                                        |   |                                     |   |                                                                      |   |                       |
| <b>R 2.</b><br>What did the mom do?                           | <b>[Click]</b> Mom <b>squawked</b> for a long time when she saw the mess we made.      |   | <b>Squawked</b> is like complained. |   | <b>Squawked</b> means to say loudly you don't like something         |   |                       |
| <b>Response (transcribe and highlight if questionable)</b>    |                                                                                        |   |                                     |   |                                                                      |   |                       |
| <b>R 3.</b><br>What does he do to the boy's hair?             | <b>[Click]</b> Dad likes to <b>ruffle</b> my hair and make me laugh.                   |   | <b>Ruffle</b> is like disturb.      |   | <b>Ruffle</b> means to move something that is even to make it messy. |   |                       |
| <b>Response (transcribe and highlight if questionable)</b>    |                                                                                        |   |                                     |   |                                                                      |   |                       |
| <b>R 4.</b><br>What did the girl do?                          | <b>[Click]</b> The girl <b>pouted</b> because she didn't want to share her basketball. |   | <b>Pouted</b> is like frowned.      |   | <b>Pouted</b> means to look upset by pushing out the lips.           |   |                       |
| <b>Response (transcribe and highlight if questionable)</b>    |                                                                                        |   |                                     |   |                                                                      |   |                       |
| <b>R 5.</b><br>What did she do with her backpack?             | <b>[Click]</b> The young girl <b>heaved</b> her heavy backpack over her shoulder.      |   | <b>Heaved</b> is like lifted.       |   | <b>Heaved</b> means to do something with great effort.               |   |                       |
| <b>Response (transcribe and highlight if questionable)</b>    |                                                                                        |   |                                     |   |                                                                      |   |                       |
| <b>R 6.</b><br>What did he do with his toys?                  | <b>[Click]</b> He <b>gathered</b> all of his toys and put them in a basket.            |   | <b>Gathered</b> is like collected.  |   | <b>Gathered</b> means to have brought together in one place.         |   |                       |
| <b>Response (transcribe and highlight if questionable)</b>    |                                                                                        |   |                                     |   |                                                                      |   |                       |
| <b>Notes on extra exposure:</b>                               |                                                                                        |   |                                     |   |                                                                      |   |                       |

Participant Number: \_\_\_\_\_ Examiner: \_\_\_\_\_ Date: \_\_\_\_\_

Treatment Session Number: \_\_\_\_\_

Dose = 9; Dose Frequency = 4      Dose Frequency for this Training (circle 1): 1 2 3 4

Videotape Number: \_\_\_\_\_ Start time: \_\_\_\_\_ End time: \_\_\_\_\_ Session Length: \_\_\_\_\_

**Preview (Definition + Synonym + Context):****SAY:** "Let's look at some of the words we'll hear in our storybook."

| <b><u>SHOW Definition</u></b><br><b><u>Picture and SAY</u></b> | <b><u>SAY Definition</u></b>                                                    | √ | <b><u>SAY</u></b><br><b><u>Synonym</u></b> | √ | <b><u>SAY</u></b><br><b><u>Context</u></b>                                  | √ | <b><u>X</u></b><br><b><u>exposure</u></b> |
|----------------------------------------------------------------|---------------------------------------------------------------------------------|---|--------------------------------------------|---|-----------------------------------------------------------------------------|---|-------------------------------------------|
| <b>P 1.</b><br>Tell me what <b><i>gulp</i></b> means.          | <b><i>Gulp</i></b> means to quickly eat or drink big bites or sips.             |   | <b><i>Gulp</i></b> is like swallow.        |   | Each man took a big <b><i>gulp</i></b> of his hot dog.                      |   |                                           |
| <b>Response</b>                                                |                                                                                 |   |                                            |   |                                                                             |   |                                           |
| <b>P 2.</b><br>Tell me what <b><i>invisible</i></b> means.     | <b><i>Invisible</i></b> means not able to be seen.                              |   | <b><i>Invisible</i></b> is like hidden.    |   | The man's body was <b><i>invisible</i></b> and all we saw were his clothes. |   |                                           |
| <b>Response</b>                                                |                                                                                 |   |                                            |   |                                                                             |   |                                           |
| <b>P 3.</b><br>Tell me what <b><i>marvel</i></b> means.        | <b><i>Marvel</i></b> means a person or thing that causes surprise or curiosity. |   | <b><i>Marvel</i></b> is like wonder.       |   | The stars were a <b><i>marvel</i></b> and the boy looked at them for hours. |   |                                           |
| <b>Response</b>                                                |                                                                                 |   |                                            |   |                                                                             |   |                                           |
| <b>P 4.</b><br>Tell me what <b><i>midday</i></b> means.        | <b><i>Midday</i></b> means the middle part of the day.                          |   | <b><i>Midday</i></b> is like afternoon.    |   | The sun was high in the sky at <b><i>midday</i></b> .                       |   |                                           |
| <b>Response</b>                                                |                                                                                 |   |                                            |   |                                                                             |   |                                           |
| <b>P 5.</b><br>Tell me what <b><i>swaying</i></b> means.       | <b><i>Swaying</i></b> means swinging back and forth or side to side.            |   | <b><i>Swaying</i></b> is like rocking.     |   | The trees were <b><i>swaying</i></b> in the wind during the rain storm.     |   |                                           |
| <b>Response</b>                                                |                                                                                 |   |                                            |   |                                                                             |   |                                           |
| <b>P 6.</b><br>Tell me what <b><i>swift</i></b> means.         | <b><i>Swift</i></b> means moving quickly, with great speed.                     |   | <b><i>Swift</i></b> is like fast.          |   | The cheetah was <b><i>swift</i></b> when he ran through the field           |   |                                           |
| <b>Response</b>                                                |                                                                                 |   |                                            |   |                                                                             |   |                                           |
| <b>Notes on extra exposure:</b>                                |                                                                                 |   |                                            |   |                                                                             |   |                                           |

**CONTINUE TO NEXT PAGE FOR BOOK READING**

**Book Reading (Text + Synonym + Definition):****SAY:** “Let’s read our storybook and listen for those words!”

| <b><u>SHOW</u><br/>Book<br/>Picture</b> | <b><u>READ</u> Text</b>                                                                                     | √ | <b><u>SAY</u> Synonym</b>        | √ | <b><u>SAY</u> Definition</b>                                             | √ | <b>X</b><br>exposure |
|-----------------------------------------|-------------------------------------------------------------------------------------------------------------|---|----------------------------------|---|--------------------------------------------------------------------------|---|----------------------|
| <b>Page 3</b>                           | “One bad day, they met a tuna fish, <b>swift</b> , fierce and very hungry.”                                 |   | <b>Swift</b> is like fast.       |   | <b>Swift</b> means moving quickly, with great speed.                     |   |                      |
| <b>Page 3</b>                           | “He swallowed all the little red fish in one <b>gulp</b> .”                                                 |   | <b>Gulp</b> is like swallow.     |   | <b>Gulp</b> means to quickly eat or drink big bites or sips.             |   |                      |
| <b>Page 6</b>                           | “But the sea was full of wonderful creatures, and as he swam to each <b>marvel</b> Swimmy was happy again.” |   | <b>Marvel</b> is like wonder.    |   | <b>Marvel</b> means a person or thing that causes surprise or curiosity. |   |                      |
| <b>Page 10</b>                          | “...Strange fish pulled by an <b>invisible</b> thread....”                                                  |   | <b>Invisible</b> is like hidden. |   | <b>Invisible</b> means not able to be seen.                              |   |                      |
| <b>Page 16</b>                          | “...and sea anemones, who looked like pink palm trees <b>swaying</b> in the wind.”                          |   | <b>Swaying</b> is like rocking.  |   | <b>Swaying</b> means swinging back and forth or side to side.            |   |                      |
| <b>Page 26</b>                          | “And so they swam in the cool morning water and the <b>midday</b> sun and chased the big fish away.”        |   | <b>Midday</b> is like afternoon. |   | <b>Midday</b> means the middle part of the day.                          |   |                      |
| <b>Notes on extra exposure:</b>         |                                                                                                             |   |                                  |   |                                                                          |   |                      |

**CONTINUE TO NEXT PAGE FOR REVIEW**

**Review (Naming + Context + Synonym + Definition):****SAY** “Let’s think about the different words from our storybook.”

| <b><u>SHOW</u></b><br>Context<br>Picture and<br><b><u>SAY</u></b> | <b><u>SAY</u></b> Context                                                                            | √ | <b><u>SAY</u></b> Synonym        | √ | <b><u>SAY</u></b> Definition                                             | √ | <b>X</b><br>exposure |
|-------------------------------------------------------------------|------------------------------------------------------------------------------------------------------|---|----------------------------------|---|--------------------------------------------------------------------------|---|----------------------|
| <b>R 1.</b><br>How is the boy running?                            | <b>[Click]</b> The boy was <b>swift</b> during the race and finished in first place.                 |   | <b>Swift</b> is like fast.       |   | <b>Swift</b> means moving quickly, with great speed.                     |   |                      |
| <b>Response (transcribe and highlight if questionable)</b>        |                                                                                                      |   |                                  |   |                                                                          |   |                      |
| <b>R 2.</b><br>What is the flag doing?                            | <b>[Click]</b> The flag was <b>swaying</b> in the wind on Tuesday night.                             |   | <b>Swaying</b> is like rocking.  |   | <b>Swaying</b> means swinging back and forth or side to side.            |   |                      |
| <b>Response (transcribe and highlight if questionable)</b>        |                                                                                                      |   |                                  |   |                                                                          |   |                      |
| <b>R 3.</b><br>When is it?                                        | <b>[Click]</b> At school, we eat lunch with the other kids at <b>midday</b> .                        |   | <b>Midday</b> is like afternoon. |   | <b>Midday</b> means the middle part of the day.                          |   |                      |
| <b>Response (transcribe and highlight if questionable)</b>        |                                                                                                      |   |                                  |   |                                                                          |   |                      |
| <b>R 4.</b><br>What is the candy store?                           | <b>[Click]</b> The candy store was a marvel with so many different flavors!                          |   | <b>Marvel</b> is like wonder.    |   | <b>Marvel</b> means a person or thing that causes surprise or curiosity. |   |                      |
| <b>Response (transcribe and highlight if questionable)</b>        |                                                                                                      |   |                                  |   |                                                                          |   |                      |
| <b>R 5.</b><br>How does the window look?                          | <b>[Click]</b> The bird flew into the window because it was <b>invisible</b> and he couldn’t see it. |   | <b>Invisible</b> is like hidden. |   | <b>Invisible</b> means not able to be seen.                              |   |                      |
| <b>Response (transcribe and highlight if questionable)</b>        |                                                                                                      |   |                                  |   |                                                                          |   |                      |
| <b>R 6.</b><br>What does she do with her snack?                   | <b>[Click]</b> She was so hungry that she finished her snack in one big <b>gulp</b> .                |   | <b>Gulp</b> is like swallow.     |   | <b>Gulp</b> means to quickly eat or drink big bites or sips.             |   |                      |
| <b>Response (transcribe and highlight if questionable)</b>        |                                                                                                      |   |                                  |   |                                                                          |   |                      |
| <b>Notes on extra exposure:</b>                                   |                                                                                                      |   |                                  |   |                                                                          |   |                      |
