# Supplementary material for: The Impact of Dose and Dose Frequency on Word Learning by Kindergarten Children With Developmental Language Disorder During Interactive Book Reading
Source: PubMed Central journal article supplement — Lang Speech Hear Serv Sch. 2019 Oct 10;50(4):518–39. doi: 10.1044/2019_LSHSS-VOIA-18-0131 (PMC7210430; doi:10.1044/2019_lshss-voia-18-0131), 2019-10-10
Supplement: LSHSS-50-518-s006.pdf [file LSHSS-50-518-s006.pdf]

**Method: Outcome Measure**

Supplemental Material S6 includes information on the delay (in days) between children’s last treatment session and the first session of the immediate or 2-week post-treatment definition task for each of the four treatment conditions. Each variable also includes a Kruskal-Wallis test. None of the variables showed a significant effect for treatment arm, indicating no significant differences between groups on the delay between treatment and the posttest.

**Supplemental Material S6.** *Days between treatment and the immediate and 2-week post-treatment tests for each of the four treatment arms.*

| Event                                                                               |           | Arm 1: 6x6 – 9x4<br>(n = 8) | Arm 2: 9x4 – 6x6<br>(n = 9) | Arm 3: 4x9 – 6x6<br>(n = 9) | Arm 4: 6x6 – 4x9<br>(n = 8) |
|-------------------------------------------------------------------------------------|-----------|-----------------------------|-----------------------------|-----------------------------|-----------------------------|
| <b>Immediate posttest after Treatment 1</b><br>$\chi^2 (3, N = 34) = 4.13, p = .25$ | <i>M</i>  | 4                           | 4                           | 4                           | 7                           |
|                                                                                     | <i>SD</i> | 2                           | 2                           | 2                           | 5                           |
|                                                                                     | Range     | 1-7                         | 1-7                         | 1-7                         | 2-19                        |
| <b>2-week posttest after Treatment 1</b><br>$\chi^2 (3, N = 34) = 1.16, p = .76$    | <i>M</i>  | 17                          | 21                          | 28                          | 18                          |
|                                                                                     | <i>SD</i> | 3                           | 11                          | 24                          | 3                           |
|                                                                                     | Range     | 15-21                       | 9-45                        | 14-90                       | 14-23                       |
| <b>Immediate posttest after Treatment 2</b><br>$\chi^2 (3, N = 34) = 4.58, p = .21$ | <i>M</i>  | 6                           | 7                           | 7                           | 4                           |
|                                                                                     | <i>SD</i> | 5                           | 8                           | 3                           | 4                           |
|                                                                                     | Range     | 2-14                        | 2-27                        | 3-15                        | 1-14                        |
| <b>2-week posttest after Treatment 2</b><br>$\chi^2 (3, N = 34) = 2.72, p = .44$    | <i>M</i>  | 21                          | 20                          | 25                          | 18                          |
|                                                                                     | <i>SD</i> | 7                           | 5                           | 12                          | 5                           |
|                                                                                     | Range     | 12-35                       | 14-26                       | 14-49                       | 13-26                       |
