# Supplementary material for: The Impact of Dose and Dose Frequency on Word Learning by Kindergarten Children With Developmental Language Disorder During Interactive Book Reading
Source: PubMed Central journal article supplement — Lang Speech Hear Serv Sch. 2019 Oct 10;50(4):518–39. doi: 10.1044/2019_LSHSS-VOIA-18-0131 (PMC7210430; doi:10.1044/2019_lshss-voia-18-0131), 2019-10-10
Supplement: LSHSS-50-518-s008.pdf [file LSHSS-50-518-s008.pdf]

**Results: Final Piecewise Growth Model**

Supplemental Material S8 shows the parameter estimates for the final piecewise growth model. Relevant effects (i.e., slope estimates) for the research questions are described and interpreted in the text of the main manuscript.

**Supplemental Material S8.** *Parameter estimates for the final piecewise growth model for Set 1 and Set 2 words.*

| Model Effects                  | Set 1 Words |     |            | Set 2 Words |     |            |
|--------------------------------|-------------|-----|------------|-------------|-----|------------|
|                                | Estimate    | SE  | <i>p</i> < | Estimate    | SE  | <i>p</i> < |
| <b>Fixed Effects</b>           |             |     |            |             |     |            |
| <i>Intercept</i>               | .87         | .14 | .0001      | .41         | .14 | .002       |
| <i>Slope Treatment Phase 1</i> | .26         | .09 | .003       | .14         | .08 | .065       |
| <i>Slope Treatment Phase 2</i> | -.28        | .07 | .0001      | .48         | .06 | .001       |
| <b>Random Effects</b>          |             |     |            |             |     |            |
| <i>Intercept Variance</i>      | .10         | .05 | .038       | .06         | .04 | .074       |
| <i>Residual Variance</i>       | .68         | .07 | .0001      | .56         | .06 | .0001      |
