# Supplementary material for: The Impact of Dose and Dose Frequency on Word Learning by Kindergarten Children With Developmental Language Disorder During Interactive Book Reading
Source: PubMed Central journal article supplement — Lang Speech Hear Serv Sch. 2019 Oct 10;50(4):518–39. doi: 10.1044/2019_LSHSS-VOIA-18-0131 (PMC7210430; doi:10.1044/2019_lshss-voia-18-0131), 2019-10-10
Supplement: LSHSS-50-518-s010.pdf [file LSHSS-50-518-s010.pdf]

**Results: Items Analysis**

**Supplemental Material S10.** Correlation (*r*) between the percent of children who defined the target word correctly at the final treatment session (column 2) or the immediate post-test (column 3) and various word or exposure characteristics (listed in column 1).

|                                                                                                                 | % of children who defined the target word correctly at final treatment session | % of children who defined the target word correctly at immediate post-test |
|-----------------------------------------------------------------------------------------------------------------|--------------------------------------------------------------------------------|----------------------------------------------------------------------------|
| % of children who defined word correctly at immediate post-test                                                 | .47**                                                                          |                                                                            |
| % of children who defined word correctly at immediate post-test in PRIOR study (Storkel, Voelmle, et al., 2017) | .23~                                                                           | .56**                                                                      |
| # of words in the book text for the exposure sentence                                                           | -.24~                                                                          | -.01                                                                       |
| Average frequency of the content words in the book text exposure sentence                                       | <.01                                                                           | .08                                                                        |
| # of words in the definition used for training                                                                  | -.12                                                                           | -.10                                                                       |
| Average frequency of the content words in the definition used for training                                      | -.05                                                                           | -.14                                                                       |
| # of words in the context sentence                                                                              | -.06                                                                           | .11                                                                        |
| Average frequency of the content words in the context sentence used for training                                | -.26* <sup>1</sup>                                                             | .05                                                                        |
| Frequency of the synonym used for training                                                                      | -.10                                                                           | -.06                                                                       |
| Frequency of the target word                                                                                    | -.16                                                                           | .01                                                                        |

\*\*p < .001, \*p < .05, ~p < .10

<sup>1</sup>This correlation becomes non-significant when two outliers are removed.

Effect of Part of Speech (noun, verb, adjective) on % of children who defined word correctly at final treatment session: F (2, 57) = .21, p = .82, non-significant

Effect of Part of Speech (noun, verb, adjective) on % of children who defined word correctly at immediate post-test: F (2, 57) = .81, p = .45, non-significant
